# Supplementary material for: Optogenetic manipulation of lysosomal physiology and autophagy-dependent clearance of amyloid beta
Source: PLoS Biol. 2024 Apr 23;22(4):e3002591. doi: 10.1371/journal.pbio.3002591 (PMC11068202; doi:10.1371/journal.pbio.3002591)
Supplement: S1 Data — Excel spreadsheet containing, in separate sheets, the underlying numerical data and statistical analysis for Figs 1d, 2b, 2d, 2f, 2h, 2j, 2l, 3a, 3b, 3c, 3d, 3e, 3f, 4b, 4d, 4f, 4g, 4h, 5b, 5d, 5e, 5g, 5i, 5k, 5m, 6e, 6g, 6j, 6k, S3a, S3b, S3c, S3d, S3e, S3f, S3g, S3h, S3i, S3j, S3k, S3l, S3m, S3n, S3o, S4a, S4b, S5d, S6b, S8b, S8c, and S9b. (XLSX) [file pbio.3002591.s012.xlsx]

## Sheet: Fig 1d
Lyso-NpHR3.0 lysosomal membrane current			Lyso-NpHR3.0 lysosomal membrane potential			Lyso-ArchT lysosomal membrane current			Lyso-ArchT lysosomal membrane potential			Lyso-ChR2 lysosomal membrane current			Lyso-ChR2 lysosomal membrane potential
Time	Current (pA)		Time	Membrane potential (mV)		Time	Current (pA)		Time	Membrane potential (mV)		Time	Current (pA)		Time	Membrane potential (mV)
0	10.3599		0	-5.96137		0	36.0439		0	-4.67526		0	4.17519		0	-27.6454
1	10.5411		1	-5.94552		1	35.9597		1	-4.65981		1	4.22218		1	-27.624
2	10.6908		2	-5.92183		2	35.8949		2	-4.64535		2	4.41251		2	-27.6027
3	10.7505		3	-5.89102		3	35.9711		3	-4.63517		3	4.56639		3	-27.5816
4	10.7021		4	-5.85443		4	36.104		4	-4.62843		4	4.64198		4	-27.5608
5	10.722		5	-5.81605		5	36.1502		5	-4.6231		5	4.7289		5	-27.5404
6	10.983		6	-5.78479		6	36.144		6	-4.6182		6	4.8044		6	-27.5205
7	11.3242		7	-5.76639		7	36.1469		7	-4.61209		7	4.80012		7	-27.5011
8	11.4599		8	-5.75856		8	36.1316		8	-4.60478		8	4.79995		8	-27.4824
9	11.2789		9	-5.75924		9	36.1177		9	-4.60004		9	4.86368		9	-27.4643
10	10.805		10	-5.76844		10	36.1562		10	-4.60231		10	4.91809		10	-27.4469
11	10.274		11	-5.77743		11	36.2241		11	-4.61312		11	4.86658		11	-27.4303
12	9.98827		12	-5.76956		12	36.2528		12	-4.62992		12	4.6853		12	-27.4145
13	10.0007		13	-5.7401		13	36.2202		13	-4.64633		13	4.49927		13	-27.3996
14	10.2506		14	-5.70955		14	36.2038		14	-4.65501		14	4.44267		14	-27.3855
15	10.6533		15	-5.70311		15	36.264		15	-4.65323		15	4.4508		15	-27.3723
16	10.939		16	-5.72104		16	36.3069		16	-4.64304		16	4.37013		16	-27.36
17	10.9302		17	-5.74773		17	36.2632		17	-4.62745		17	4.23472		17	-27.3486
18	10.7104		18	-5.7726		18	36.2563		18	-4.60904		18	4.26768		18	-27.3381
19	10.3937		19	-5.78302		19	36.3913		19	-4.5877		19	4.48241		19	-27.3284
20	10.1166		20	-5.76031		20	36.5775		20	-4.56189		20	4.65049		20	-27.3196
21	10.0312		21	-5.69909		21	36.6455		21	-4.53512		21	4.701		21	-27.3117
22	10.1694		22	-5.61793		22	36.5324		22	-4.51467		22	4.72246		22	-27.3046
23	10.3879		23	-5.549		23	36.3064		23	-4.50333		23	4.72818		23	-27.2982
24	10.5397		24	-5.51632		24	36.0691		24	-4.50066		24	4.68717		24	-27.2927
25	10.567		25	-5.51666		25	35.9529		25	-4.50662		25	4.64114		25	-27.2879
26	10.4375		26	-5.53076		26	36.0065		26	-4.51964		26	4.66452		26	-27.2838
27	10.2703		27	-5.54946		27	36.1276		27	-4.53767		27	4.69173		27	-27.2804
28	10.2723		28	-5.5753		28	36.2533		28	-4.55804		28	4.58514		28	-27.2777
29	10.3877		29	-5.60888		29	36.357		29	-4.5762		29	4.38492		29	-27.2757
30	10.378		30	-5.64653		30	36.3834		30	-4.59059		30	4.27117		30	-27.2742
31	10.2273		31	-5.68721		31	36.3661		31	-4.60114		31	4.33737		31	-27.2733
32	10.0764		32	-5.73337		32	36.3448		32	-4.60758		32	4.4911		32	-27.2731
33	9.96326		33	-5.78686		33	36.3113		33	-4.6121		33	4.60376		33	-27.2733
34	9.88363		34	-5.8469		34	36.3193		34	-4.6145		34	4.61575		34	-27.2741
35	9.83283		35	-5.90854		35	36.4231		35	-4.61313		35	4.57661		35	-27.2753
36	9.76584		36	-5.96272		36	36.5694		36	-4.60791		36	4.5889		36	-27.277
37	9.7268		37	-6.0037		37	36.6495		37	-4.59746		37	4.64784		37	-27.2792
38	9.81691		38	-6.03148		38	36.5968		38	-4.58131		38	4.71408		38	-27.2817
39	10.0387		39	-6.04774		39	36.4437		39	-4.562		39	4.79895		39	-27.2847
40	10.3534		40	-6.05073		40	36.2903		40	-4.53998		40	4.86416		40	-27.288
41	10.6894		41	-6.02973		41	36.2163		41	-4.51683		41	4.82643		41	-27.2917
42	10.9185		42	-5.97681		42	36.2691		42	-4.49833		42	4.73818		42	-27.2956
43	10.9921		43	-5.89922		43	36.4081		43	-4.48512		43	4.73066		43	-27.2999
44	10.9824		44	-5.8076		44	36.4986		44	-4.47635		44	4.79461		44	-27.3044
45	10.9372		45	-5.70765		45	36.4403		45	-4.47687		45	4.83339		45	-27.3091
46	10.8164		46	-5.60199		46	36.289		46	-4.48599		46	4.81615		46	-27.314
47	10.6213		47	-5.48195		47	36.18		47	-4.4936		47	4.77425		47	-27.3191
48	10.4981		48	-5.33474		48	36.1399		48	-4.49344		48	4.74544		48	-27.3244
49	10.6259		49	-5.16697		49	36.1155		49	-4.491		49	4.75968		49	-27.3297
50	11.0379		50	-4.99524		50	36.1422		50	-4.49456		50	4.78503		50	-27.3352
51	11.6022		51	-4.82519		51	36.2805		51	-4.50337		51	4.73176		51	-27.3407
52	12.0706		52	-4.65934		52	36.4616		52	-4.51263		52	4.6112		52	-27.3462
53	12.174		53	-4.50494		53	36.5651		53	-4.52285		53	4.53602		53	-27.3518
54	11.9449		54	-4.36305		54	36.5572		54	-4.53461		54	4.57081		54	-27.3573
55	11.6706		55	-4.22235		55	36.4778		55	-4.54342		55	4.64696		55	-27.3629
56	11.3811		56	-4.07209		56	36.3847		56	-4.54516		56	4.65253		56	-27.3684
57	10.9938		57	-3.91263		57	36.2916		57	-4.53914		57	4.62969		57	-27.3738
58	10.7421		58	-3.74943		58	36.1673		58	-4.52718		58	4.68459		58	-27.3792
59	10.8447		59	-3.5862		59	36.0476		59	-4.50962		59	4.79471		59	-27.3845
60	11.1276		60	-3.42216		60	35.989		60	-4.48696		60	4.87327		60	-27.3897
61	11.3438		61	-3.25422		61	36.0306		61	-4.4666		61	4.89181		61	-27.3948
62	11.5321		62	-3.07886		62	36.1513		62	-4.45649		62	4.85442		62	-27.3998
63	11.7573		63	-2.89082		63	36.2554		63	-4.45425		63	4.76421		63	-27.4047
64	11.9353		64	-2.68849		64	36.2871		64	-4.45095		64	4.6475		64	-27.4095
65	12.0802		65	-2.47533		65	36.2451		65	-4.44449		65	4.51834		65	-27.4143
66	12.2168		66	-2.2541		66	36.2036		66	-4.44229		66	4.38203		66	-27.4189
67	12.2002		67	-2.02988		67	36.2468		67	-4.44909		67	4.26107		67	-27.4235
68	11.8986		68	-1.81519		68	36.296		68	-4.46256		68	4.20631		68	-27.4281
69	11.431		69	-1.62625		69	36.2149		69	-4.48035		69	4.24902		69	-27.4326
70	11.1451		70	-1.47552		70	36.0938		70	-4.50392		70	4.32908		70	-27.4371
71	11.284		71	-1.36237		71	36.1226		71	-4.53486		71	4.37392		71	-27.4416
72	11.6855		72	-1.27355		72	36.2668		72	-4.57015		72	4.36862		72	-27.4461
73	11.9254		73	-1.20163		73	36.3527		73	-4.60508		73	4.40057		73	-27.4506
74	11.8569		74	-1.14862		74	36.3277		74	-4.63868		74	4.52772		74	-27.4552
75	11.6833		75	-1.10751		75	36.2721		75	-4.66844		75	4.67456		75	-27.4599
76	11.5289		76	-1.0652		76	36.2509		76	-4.6857		76	4.76321		76	-27.4647
77	11.312		77	-1.02272		77	36.2405		77	-4.68482		77	4.74673		77	-27.4696
78	10.9638		78	-0.99201		78	36.2164		78	-4.67069		78	4.63714		78	-27.4747
79	10.5786		79	-0.9801		79	36.2445		79	-4.65121		79	4.51494		79	-27.48
80	10.2883		80	-0.97838		80	36.3747		80	-4.62756		80	4.45943		80	-27.4855
81	10.1421		81	-0.96725		81	36.5463		81	-4.59862		81	4.51939		81	-27.4912
82	10.1685		82	-0.93543		82	36.6436		82	-4.5689		82	4.66678		82	-27.4972
83	10.4485		83	-0.88403		83	36.6327		83	-4.54461		83	4.79253		83	-27.5035
84	10.9907		84	-0.81768		84	36.5636		84	-4.52733		84	4.84249		84	-27.5101
85	11.5593		85	-0.74103		85	36.4541		85	-4.5166		85	4.86471		85	-27.517
86	11.8845		86	-0.66297		86	36.3388		86	-4.51194		86	4.89089		86	-27.5242
87	12.0021		87	-0.59892		87	36.3013		87	-4.51284		87	4.88336		87	-27.5318
88	12.138		88	-0.56716		88	36.3879		88	-4.52119		88	4.82969		88	-27.5397
89	12.3765		89	-0.58315		89	36.5931		89	-4.53956		89	4.74711		89	-27.5481
90	12.5169		90	-0.64864		90	36.8163		90	-4.56601		90	4.62566		90	-27.5568
91	12.3344		91	-0.74581		91	36.8725		91	-4.59324		91	4.49077		91	-27.5659
92	11.9489		92	-0.85108		92	36.7112		92	-4.6157		92	4.43139		92	-27.5754
93	11.7438		93	-0.95522		93	36.4961		93	-4.63505		93	4.50086		93	-27.5852
94	11.8426		94	-1.06244		94	36.4316		94	-4.65433		94	4.63223		94	-27.5955
95	11.8739		95	-1.17466		95	36.561		95	-4.67191		95	4.69734		95	-27.606
96	11.535		96	-1.28967		96	36.7084		96	-4.68409		96	4.62552		96	-27.6172
97	11.0182		97	-1.40647		97	36.7209		97	-4.69086		97	4.43337		97	-27.6284
98	10.623		98	-1.51986		98	36.6472		98	-4.6948		98	4.25952		98	-27.6399
99	10.3717		99	-1.62142		99	36.5678		99	-4.69334		99	4.27128		99	-27.6516
100	10.1366		100	-1.71002		100	36.471		100	-4.68008		100	4.43296		100	-27.6635
101	9.92628		101	-1.79251		101	36.3361		101	-4.6556		101	4.60579		101	-27.6756
102	9.87626		102	-1.87999		102	36.1989		102	-4.63105		102	4.78485		102	-27.6878
103	10.0614		103	-1.98537		103	36.1286		103	-4.61705		103	4.98778		103	-27.7
104	10.4253		104	-2.11533		104	36.184		104	-4.61273		104	5.15804		104	-27.7122
105	10.828		105	-2.26519		105	36.3572		105	-4.61163		105	5.2235		105	-27.7244
106	11.1188		106	-2.42566		106	36.5651		106	-4.61226		106	5.16226		106	-27.7364
107	11.252		107	-2.5876		107	36.7028		107	-4.61617		107	5.08678		107	-27.7483
108	11.3171		108	-2.74483		108	36.6949		108	-4.62268		108	5.08114		108	-27.76
109	11.3274		109	-2.90096		109	36.5768		109	-4.6288		109	5.08805		109	-27.7714
110	11.1651		110	-3.06429		110	36.4667		110	-4.63459		110	5.01797		110	-27.7825
111	10.8818		111	-3.23687		111	36.4209		111	-4.64364		111	4.85482		111	-27.7932
112	10.6979		112	-3.41617		112	36.4161		112	-4.65451		112	4.67698		112	-27.8035
113	10.6582		113	-3.59902		113	36.4036		113	-4.6628		113	4.54751		113	-27.8134
114	10.6214		114	-3.78308		114	36.4053		114	-4.6705		114	4.50775		114	-27.8228
115	10.4567		115	-3.96698		115	36.4782		115	-4.68089		115	4.54773		115	-27.8316
116	10.0973		116	-4.14754		116	36.5949		116	-4.68969		116	4.57976		116	-27.8399
117	9.63135		117	-4.32005		117	36.7152		117	-4.6933		117	4.58747		117	-27.8477
118	9.29089		118	-4.48264		118	36.8108		118	-4.69474		118	4.57472		118	-27.8549
119	9.17244		119	-4.63759		119	36.8312		119	-4.69343		119	4.52533		119	-27.8615
120	9.16249		120	-4.78561		120	36.7569		120	-4.68405		120	4.50508		120	-27.8675
121	9.27188		121	-4.92528		121	36.6447		121	-4.66963		121	4.622		121	-27.873
122	9.68724		122	-5.06139		122	36.5856		122	-4.65855		122	4.84921		122	-27.878
123	10.3768		123	-5.20174		123	36.5937		123	-4.65038		123	4.99998		123	-27.8824
124	11.0563		124	-5.34635		124	36.5701		124	-4.64178		124	5.00806		124	-27.8864
125	11.5328		125	-5.48917		125	36.5039		125	-4.63451		125	4.96029		125	-27.8899
126	11.8119		126	-5.62856		126	36.5283		126	-4.62967		126	4.89631		126	-27.8929
127	11.9889		127	-5.76878		127	36.6072		127	-4.62621		127	4.79574		127	-27.8955
128	12.1005		128	-5.9139		128	36.5559		128	-4.62509		128	4.63857		128	-27.8978
129	12.1106		129	-6.06518		129	36.3653		129	-4.62817		129	4.46597		129	-27.8997
130	12.0494		130	-6.22114		130	36.2168		130	-4.63591		130	4.4019		130	-27.9013
131	12.0497		131	-6.38069		131	36.2296		131	-4.6476		131	4.4729		131	-27.9027
132	12.1555		132	-6.54401		132	36.3289		132	-4.66109		132	4.57181		132	-27.9038
133	12.1055		133	-6.70899		133	36.3842		133	-4.6718		133	4.63404		133	-27.9047
134	11.7158		134	-6.87338		134	36.3855		134	-4.67583		134	4.66921		134	-27.9055
135	11.2604		135	-7.0378		135	36.4229		135	-4.67458		135	4.70598		135	-27.9062
136	10.9595		136	-7.20134		136	36.541		136	-4.67004		136	4.68678		136	-27.9067
137	10.7005		137	-7.35828		137	36.701		137	-4.6601		137	4.51304		137	-27.9073
138	10.4788		138	-7.50426		138	36.7862		138	-4.64264		138	4.31048		138	-27.9077
139	10.4698		139	-7.64368		139	36.6679		139	-4.62004		139	4.26283		139	-27.9081
140	10.6842		140	-7.78387		140	36.3763		140	-4.5978		140	4.28725		140	-27.9085
141	10.8947		141	-7.92236		141	36.1162		141	-4.5807		141	4.2702		141	-27.909
142	10.9312		142	-8.05083		142	36.0343		142	-4.56968		142	4.28583		142	-27.9094
143	10.8451		143	-8.16776		143	36.0899		143	-4.56212		143	4.45046		143	-27.9099
144	10.7204		144	-8.2752		144	36.1804		144	-4.55697		144	4.74748		144	-27.9104
145	10.5731		145	-8.37021		145	36.2288		145	-4.55406		145	5.0549		145	-27.911
146	10.4727		146	-8.44356		146	36.1983		146	-4.55273		146	5.27354		146	-27.9116
147	10.5308		147	-8.48435		147	36.138		147	-4.55639		147	5.33171		147	-27.9123
148	10.7134		148	-8.49693		148	36.0911		148	-4.56892		148	5.22689		148	-27.9131
149	10.853		149	-8.50958		149	36.0218		149	-4.5896		149	5.05349		149	-27.7724
150	10.8333		150	-8.55114		150	35.9593		150	-4.61634		150	4.85492		150	-27.762
151	10.6949		151	-8.62565		151	36.0034		151	-4.64513		151	4.65261		151	-27.7511
152	10.5825		152	-8.71827		152	36.1487		152	-4.66923		152	4.57439		152	-27.7395
153	10.5395		153	-8.81935		153	36.262		153	-4.68417		153	4.63471		153	-27.7274
154	10.4981		154	-8.92939		154	36.2999		154	-4.69014		154	4.71258		154	-27.7146
155	10.4587		155	-9.04703		155	36.3397		155	-4.68945		155	4.74302		155	-27.7012
156	10.4113		156	-9.16126		156	36.3726		156	-4.68533		156	4.69552		156	-27.687
157	10.3425		157	-9.25285		157	36.3277		157	-4.68222		157	4.62087		157	-27.6722
158	10.3547		158	-9.3048		158	36.2025		158	-4.68109		158	4.57933		158	-27.6566
159	10.4872		159	-9.3159		159	36.1		159	-4.67582		159	4.58383		159	-27.6403
160	10.6563		160	-9.29792		160	36.1476		160	-4.65981		160	4.64376		160	-27.6232
161	10.8008		161	-9.26245		161	36.3258		161	-4.63848		161	4.76309		161	-27.6053
162	10.8799		162	-9.21716		162	36.4869		162	-4.62355		162	4.9231		162	-27.5866
163	10.8853		163	-9.16941		163	36.5597		163	-4.61445		163	4.99034		163	-27.5672
164	10.8173		164	-9.1265		164	36.5888		164	-4.60305		164	4.87853		164	-27.5469
165	10.6872		165	-9.09132		165	36.6086		165	-4.58937		165	4.71845		165	-27.5259
166	10.5755		166	-9.05957		166	36.6044		166	-4.58238		166	4.67748		166	-27.504
167	10.5687		167	-9.01535		167	36.5194		167	-4.58929		167	4.73634		167	-27.4815
168	10.6705		168	-8.94114		168	36.3355		168	-4.60678		168	4.77539		168	-27.4582
169	10.7395		169	-8.8394		169	36.1403		169	-4.6252		169	4.76495		169	-27.4343
170	10.5966		170	-8.7271		170	36.0089		170	-4.63861		170	4.70215		170	-27.4097
171	10.3385		171	-8.61535		171	35.9468		171	-4.64768		171	4.54459		171	-27.3845
172	10.2819		172	-8.50793		172	35.9794		172	-4.65697		172	4.36891		172	-27.3589
173	10.4282		173	-8.41535		173	36.1289		173	-4.66901		173	4.30874		173	-27.3328
174	10.4612		174	-8.35998		174	36.3347		174	-4.6806		174	4.32231		174	-27.3063
175	10.305		175	-8.35242		175	36.4874		175	-4.68807		175	4.3632		175	-27.2796
176	10.1495		176	-8.37684		176	36.5532		176	-4.69215		176	4.48918		176	-27.2527
177	10.0897		177	-8.41945		177	36.6203		177	-4.6945		177	4.67827		177	-27.2258
178	10.0479		178	-8.48786		178	36.6924		178	-4.69435		178	4.81798		178	-27.1988
179	9.94251		179	-8.58845		179	36.6197		179	-4.68912		179	4.86044		179	-27.172
180	9.87331		180	-8.70808		180	36.3772		180	-4.67662		180	4.85703		180	-27.1455
181	10.0312		181	-8.82806		181	36.1446		181	-4.66093		181	4.87177		181	-27.1193
182	10.3958		182	-8.94149		182	36.0638		182	-4.64939		182	4.93268		182	-27.0936
183	10.7659		183	-9.05087		183	36.1862		183	-4.64215		183	5.02529		183	-27.0684
184	11.0607		184	-9.15781		184	36.4332		184	-4.6341		184	5.0342		184	-27.0439
185	11.3797		185	-9.26318		185	36.5575		185	-4.62268		185	4.88828		185	-27.0203
186	11.6718		186	-9.36866		186	36.4513		186	-4.61126		186	4.75261		186	-26.9975
187	11.694		187	-9.47334		187	36.2871		187	-4.60873		187	4.75582		187	-26.9757
188	11.4568		188	-9.5758		188	36.2354		188	-4.61994		188	4.7974		188	-26.955
189	11.1938		189	-9.67716		189	36.3052		189	-4.63751		189	4.75481		189	-26.9354
190	10.9677		190	-9.77718		190	36.4493		190	-4.65301		190	4.65127		190	-26.917
191	10.7214		191	-9.87393		191	36.5724		191	-4.667		191	4.60031		191	-26.9
192	10.5286		192	-9.96836		192	36.5465		192	-4.68133		192	4.64072		192	-26.8842
193	10.4855		193	-10.0628		193	36.3888		193	-4.69389		193	4.69107		193	-26.8698
194	10.511		194	-10.1574		194	36.2575		194	-4.70288		194	4.65586		194	-26.8568
195	10.4985		195	-10.2506		195	36.2575		195	-4.7082		195	4.56309		195	-26.8453
196	10.4198		196	-10.3406		196	36.3287		196	-4.7076		196	4.49943		196	-26.8351
197	10.1994		197	-10.427		197	36.3295		197	-4.69905		197	4.43249		197	-26.8264
198	9.85967		198	-10.5099		198	36.2739		198	-4.68708		198	4.32622		198	-26.819
199	9.65232		199	-10.5871		199	36.3149		199	-4.67667		199	4.26518		199	-26.813
200	9.69228		200	-10.6577		200	36.4454		200	-4.66449		200	4.27134		200	-26.8084
201	9.85302		201	-10.7209		201	36.493		201	-4.64488		201	4.24967		201	-26.805
202	10.0682		202	-10.7756		202	36.3779		202	-4.61935		202	4.2442		202	-26.8026
203	10.3158		203	-10.8226		203	36.2287		203	-4.59545		203	4.43817		203	-26.8016
204	10.4995		204	-10.8668		204	36.2456		204	-4.58044		204	4.76588		204	-26.8018
205	10.5591		205	-10.91		205	36.4153		205	-4.57713		205	4.9612		205	-26.8029
206	10.5608		206	-10.9479		206	36.4926		206	-4.58242		206	4.9594		206	-26.8051
207	10.5428		207	-10.9804		207	36.3794		207	-4.58881		207	4.80681		207	-26.8081
208	10.3655		208	-11.0153		208	36.2035		208	-4.5893		208	4.55687		208	-26.8119
209	9.97916		209	-11.0598		209	36.0855		209	-4.58448		209	4.4057		209	-26.8165
210	9.67332		210	-11.1147		210	36.0702		210	-4.58325		210	4.46749		210	-26.8218
211	9.74826		211	-11.1789		211	36.1434		211	-4.59023		211	4.61885		211	-26.8276
212	10.0649		212	-11.2525		212	36.2465		212	-4.60045		212	4.73473		212	-26.8339
213	10.2174		213	-11.3342		213	36.3159		213	-4.60885		213	4.78601		213	-26.8407
214	10.1126		214	-11.4224		214	36.3661		214	-4.61353		214	4.7951		214	-26.8479
215	9.98096		215	-11.5164		215	36.4528		215	-4.61171		215	4.7912		215	-26.8555
216	9.91378		216	-11.6133		216	36.5419		216	-4.60114		216	4.78364		216	-26.8633
217	9.80665		217	-11.7094		217	36.5661		217	-4.58578		217	4.73992		217	-26.8713
218	9.54932		218	-11.8034		218	36.5132		218	-4.57431		218	4.64555		218	-26.8796
219	9.15977		219	-11.8958		219	36.3742		219	-4.57233		219	4.58494		219	-26.888
220	8.83586		220	-11.9863		220	36.1768		220	-4.57383		220	4.61297		220	-26.8966
221	8.7463		221	-12.0734		221	36.0523		221	-4.56601		221	4.69358		221	-26.9053
222	8.93259		222	-12.1584		222	36.0706		222	-4.54746		222	4.7616		222	-26.9141
223	9.38532		223	-12.2411		223	36.1432		223	-4.52898		223	4.76735		223	-26.9229
224	10.0594		224	-12.3191		224	36.215		224	-4.51688		224	4.74501		224	-26.9318
225	10.809		225	-12.3938		225	36.3107		225	-4.50845		225	4.77319		225	-26.9407
226	11.3384		226	-12.4685		226	36.4031		226	-4.50138		226	4.79406		226	-26.9496
227	11.4824		227	-12.5445		227	36.3797		227	-4.49656		227	4.70724		227	-26.9586
228	11.2734		228	-12.6231		228	36.1965		228	-4.49458		228	4.59836		228	-26.9675
229	10.8462		229	-12.7028		229	35.9817		229	-4.49748		229	4.58559		229	-26.9765
230	10.4959		230	-12.7808		230	35.9063		230	-4.50908		230	4.60063		230	-26.9854
231	10.4025		231	-12.8598		231	35.9763		231	-4.52626		231	4.52544		231	-26.9942
232	10.4211		232	-12.9419		232	36.0704		232	-4.53829		232	4.44255		232	-27.003
233	10.3453		233	-13.0233		233	36.1787		233	-4.54127		233	4.47668		233	-27.0117
234	10.2119		234	-13.1033		234	36.3712		234	-4.54277		234	4.53892		234	-27.0203
235	10.2495		235	-13.1869		235	36.5844		235	-4.54876		235	4.53633		235	-27.0287
236	10.6576		236	-13.2737		236	36.6575		236	-4.55792		236	4.53621		236	-27.037
237	11.3231		237	-13.3578		237	36.5604		237	-4.56702		237	4.5976		237	-27.0451
238	11.6808		238	-13.435		238	36.4121		238	-4.5726		238	4.65682		238	-27.053
239	11.3218		239	-13.5043		239	36.3034		239	-4.57242		239	4.68419		239	-27.0606
240	10.6382		240	-13.5693		240	36.2398		240	-4.56842		240	4.75582		240	-27.0679
241	10.2248		241	-13.6336		241	36.2013		241	-4.56373		241	4.84283		241	-27.0749
242	10.1291		242	-13.695		242	36.2136		242	-4.55816		242	4.8282		242	-27.0815
243	10.1385		243	-13.7446		243	36.3218		243	-4.55105		243	4.71344		243	-27.0877
244	10.1897		244	-13.7679		244	36.4709		244	-4.54537		244	4.59226		244	-27.0934
245	10.2605		245	-13.7546		245	36.5449		245	-4.54601		245	4.54588		245	-27.0986
246	10.2549		246	-13.7138		246	36.5221		246	-4.55338		246	4.5826		246	-27.1033
247	10.1037		247	-13.6636		247	36.4376		247	-4.56302		247	4.62962		247	-27.1074
248	9.87266		248	-13.6188		248	36.3159		248	-4.57053		248	4.62562		248	-27.1108
249	9.74788		249	-13.5895		249	36.2297		249	-4.57478		249	4.56699		249	-27.1136
250	9.84384		250	-13.5755		250	36.215		250	-4.57915		250	4.47486		250	-27.1156
251	10.1698		251	-13.567		251	36.2004		251	-4.58742		251	4.34413		251	-27.117
252	10.6654		252	-13.5554		252	36.1902		252	-4.60135		252	4.20243		252	-27.1176
253	11.1339		253	-13.5351		253	36.3008		253	-4.62132		253	4.13092		253	-27.1174
254	11.3646		254	-13.5054		254	36.5219		254	-4.64459		254	4.15325		254	-27.1163
255	11.3502		255	-13.4711		255	36.6919		255	-4.66697		255	4.27837		255	-27.1145
256	11.2656		256	-13.4353		256	36.741		256	-4.68394		256	4.52275		256	-27.1119
257	11.2345		257	-13.3921		257	36.7723		257	-4.69229		257	4.77428		257	-27.1084
258	11.2638		258	-13.3348		258	36.8671		258	-4.69256		258	4.89223		258	-27.1042
259	11.3692		259	-13.2629		259	36.9593		259	-4.68347		259	4.9124		259	-27.0991
260	11.5355		260	-13.179		260	36.9381		260	-4.66218		260	4.92218		260	-27.0933
261	11.672		261	-13.0854		261	36.7984		261	-4.63416		261	4.89112		261	-27.0868
262	11.7562		262	-12.9838		262	36.6446		262	-4.61144		262	4.7645		262	-27.0796
263	11.8313		263	-12.8745		263	36.5806		263	-4.59979		263	4.62356		263	-27.0717
264	11.8971		264	-12.7567		264	36.6282		264	-4.5969		264	4.59446		264	-27.0633
265	11.9052		265	-12.6337		265	36.6827		265	-4.59864		265	4.70517		265	-27.0544
266	11.7304		266	-12.5155		266	36.6213		266	-4.60023		266	4.91887		266	-27.045
267	11.3108		267	-12.4082		267	36.4639		267	-4.59971		267	5.17547		267	-27.0353
268	10.9265		268	-12.3128		268	36.3349		268	-4.60248		268	5.4322		268	-27.0253
269	10.8853		269	-12.2336		269	36.3612		269	-4.61606		269	5.50654		269	-27.0151
270	11.0792		270	-12.1724		270	36.5322		270	-4.64045		270	5.22291		270	-27.0049
271	11.2281		271	-12.123		271	36.6925		271	-4.66734		271	4.7864		271	-26.9946
272	11.2572		272	-12.0776		272	36.7771		272	-4.68704		272	4.53285		272	-26.9844
273	11.27		273	-12.0228		273	36.8066		273	-4.69475		273	4.55325		273	-26.9744
274	11.3482		274	-11.9421		274	36.7867		274	-4.69474		274	4.71516		274	-26.9647
275	11.4278		275	-11.8331		275	36.7593		275	-4.69692		275	4.84006		275	-26.9553
276	11.381		276	-11.7077		276	36.7651		276	-4.70337		276	4.84958		276	-26.9465
277	11.1908		277	-11.5769		277	36.8146		277	-4.70378		277	4.78895		277	-26.9382
278	10.9786		278	-11.4446		278	36.885		278	-4.68816		278	4.7483		278	-26.9305
279	10.8315		279	-11.3101		279	36.9165		279	-4.65712		279	4.75467		279	-26.9236
280	10.7454		280	-11.1681		280	36.8849		280	-4.62103		280	4.75324		280	-26.9174
281	10.7313		281	-11.0127		281	36.8109		281	-4.59365		281	4.7311		281	-26.9121
282	10.7566		282	-10.8435		282	36.7362		282	-4.58006		282	4.74424		282	-26.9077
283	10.7899		283	-10.6675		283	36.7129		283	-4.57459		283	4.80767		283	-26.9042
284	10.8587		284	-10.4915		284	36.7142		284	-4.57313		284	4.88071		284	-26.9018
285	10.9188		285	-10.3164		285	36.6989		285	-4.57514		285	4.90027		285	-26.9003
286	10.9012		286	-10.1432		286	36.7159		286	-4.57789		286	4.83665		286	-26.8999
287	10.7833		287	-9.97665		287	36.819		287	-4.5791		287	4.75776		287	-26.9005
288	10.5107		288	-9.82377		288	36.9621		288	-4.58091		288	4.72559		288	-26.9022
289	10.1387		289	-9.68836		289	37.024		289	-4.58614		289	4.69922		289	-26.9048
290	9.86549		290	-9.5692		290	36.9667		290	-4.5943		290	4.64664		290	-26.9085
291	9.80935		291	-9.4638		291	36.8984		291	-4.60187		291	4.61067		291	-26.9132
292	10.019		292	-9.36683		292	36.9199		292	-4.60582		292	4.61516		292	-26.9187
293	10.545		293	-9.27109		293	36.9595		293	-4.60712		293	4.56852		293	-26.9252
294	11.3256		294	-9.17702		294	36.8797		294	-4.60975		294	4.39003		294	-26.9325
295	12.0989		295	-9.09066		295	36.6937		295	-4.6159		295	4.2239		295	-26.9406
296	12.5004		296	-9.01304		296	36.5749		296	-4.62123		296	4.24359		296	-26.9494
297	12.3145		297	-8.93944		297	36.618		297	-4.61857		297	4.35488		297	-26.9589
298	11.7155		298	-8.86509		298	36.742		298	-4.60605		298	4.36981		298	-26.9689
299	11.0801		299	-8.79003		299	36.8635		299	-4.58763		299	4.33979		299	-26.9795
300	10.5725		300	-8.71427		300	36.9215		300	-4.56555		300	4.43917		300	-26.9905
301	10.1782		301	-8.63322		301	36.877		301	-4.53971		301	4.66425		301	-27.0019
302	9.95418		302	-8.54183		302	36.8124		302	-4.51457		302	4.86187		302	-27.0136
303	9.96076		303	-8.42825		303	36.8085		303	-4.49727		303	4.89448		303	-27.0255
304	10.1725		304	-8.27355		304	36.8312		304	-4.49205		304	4.78932		304	-27.0377
305	10.5956		305	-8.0764		305	36.8262		305	-4.49861		305	4.73575		305	-27.05
306	11.0921		306	-7.85972		306	36.7629		306	-4.50963		306	4.80572		306	-27.0623
307	11.2356		307	-7.64233		307	36.6262		307	-4.51692		307	4.86915		307	-27.0747
308	10.8489		308	-7.42893		308	36.4627		308	-4.52447		308	4.87748		308	-27.0871
309	10.3258		309	-7.22628		309	36.3964		309	-4.54084		309	4.88531		309	-27.0995
310	10.0946		310	-7.0418		310	36.5528		310	-4.56291		310	4.85287		310	-27.1117
311	10.1404		311	-6.87122		311	36.8605		311	-4.58079		311	4.69692		311	-27.1239
312	10.2631		312	-6.70454		312	37.0877		312	-4.59274		312	4.47901		312	-27.136
313	10.4673		313	-6.53874		313	37.1961		313	-4.6022		313	4.36694		313	-27.1479
314	10.7854		314	-6.37743		314	37.2658		314	-4.60672		314	4.36358		314	-27.1597
315	10.9832		315	-6.2208		315	37.2538		315	-4.60196		315	4.35483		315	-27.1713
316	10.8882		316	-6.06186		316	37.1545		316	-4.58849		316	4.39233		316	-27.1828
317	10.6703		317	-5.89286		317	37.0294		317	-4.57153		317	4.55419		317	-27.1941
318	10.5158		318	-5.71127		318	36.8879		318	-4.55914		318	4.68896		318	-27.2053
319	10.4294		319	-5.52095		319	36.7501		319	-4.55367		319	4.63373		319	-27.2163
320	10.3999		320	-5.32544		320	36.6541		320	-4.54721		320	4.43908		320	-27.2272
321	10.5018		321	-5.12467		321	36.6006		321	-4.53475		321	4.26841		321	-27.2379
322	10.7637		322	-4.919		322	36.5947		322	-4.52136		322	4.22608		322	-27.2486
323	11.0666		323	-4.70569		323	36.6131		323	-4.51204		323	4.29186		323	-27.2591
324	11.2294		324	-4.47757		324	36.5509		324	-4.50696		324	4.39775		324	-27.2694
325	11.1497		325	-4.23464		325	36.366		325	-4.50651		325	4.5039		325	-27.2798
326	10.8669		326	-3.98675		326	36.2016		326	-4.5117		326	4.60144		326	-27.29
327	10.6048		327	-3.74462		327	36.153		327	-4.52047		327	4.67614		327	-27.3001
328	10.5125		328	-3.51961		328	36.0923		328	-4.53051		328	4.69314		328	-27.3102
329	10.5074		329	-3.32173		329	35.9785		329	-4.5418		329	4.65572		329	-27.3203
330	10.522		330	-3.1543		330	36.0136		330	-4.55479		330	4.62686		330	-27.3303
331	10.4801		331	-3.01931		331	36.2908		331	-4.56966		331	4.6074		331	-27.3403
332	10.2903		332	-2.91474		332	36.6031		332	-4.58465		332	4.52322		332	-27.3503
333	10.1438		333	-2.82655		333	36.7292		333	-4.59803		333	4.42589		333	-27.3604
334	10.2547		334	-2.73974		334	36.6815		334	-4.60798		334	4.44456		334	-27.3704
335	10.5343		335	-2.64826		335	36.6116		335	-4.61041		335	4.56179		335	-27.3806
336	10.8484		336	-2.54996		336	36.5751		336	-4.60574		336	4.6452		336	-27.3908
337	11.0888		337	-2.4488		337	36.5102		337	-4.60005		337	4.61327		337	-27.4011
338	11.1559		338	-2.3574		338	36.4023		338	-4.59548		338	4.49923		338	-27.4115
339	11.0291		339	-2.28589		339	36.2947		339	-4.58587		339	4.39937		339	-27.4221
340	10.7114		340	-2.23372		340	36.2086		340	-4.56629		340	4.38755		340	-27.4328
341	10.3406		341	-2.18778		341	36.1472		341	-4.54258		341	4.50122		341	-27.4437
342	10.2327		342	-2.13289		342	36.1397		342	-4.52321		342	4.64156		342	-27.4548
343	10.4823		343	-2.06991		343	36.2281		343	-4.51178		343	4.62437		343	-27.4662
344	10.8056		344	-2.01041		344	36.3775		344	-4.50992		344	4.48492		344	-27.4778
345	11.0188		345	-1.95948		345	36.4978		345	-4.51583		345	4.40611		345	-27.4896
346	11.2324		346	-1.9163		346	36.5656		346	-4.52111		346	4.45735		346	-27.5017
347	11.4795		347	-1.87941		347	36.614		347	-4.51738		347	4.56225		347	-27.5142
348	11.6586		348	-1.84597		348	36.686		348	-4.50629		348	4.62447		348	-27.5269
349	11.7099		349	-1.81761		349	36.799		349	-4.4996		349	4.68413		349	-27.5399
350	11.6166		350	-1.80178		350	36.8927		350	-4.50787		350	4.77826		350	-27.5533
351	11.5083		351	-1.80198		351	36.867		351	-4.53054		351	4.78712		351	-27.5669
352	11.5817		352	-1.82063		352	36.726		352	-4.55883		352	4.66357		352	-27.5809
353	11.8419		353	-1.8663		353	36.6166		353	-4.58522		353	4.55272		353	-27.5952
354	12.1639		354	-1.94387		354	36.6601		354	-4.60597		354	4.54673		354	-27.6098
355	12.4956		355	-2.04696		355	36.784		355	-4.61766		355	4.53224		355	-27.6247
356	12.8461		356	-2.16203		356	36.8401		356	-4.62154		356	4.42995		356	-27.6399
357	13.0544		357	-2.27769		357	36.8042		357	-4.6242		357	4.3528		357	-27.6554
358	12.8107		358	-2.39023		358	36.7145		358	-4.62748		358	4.36754		358	-27.6711
359	12.1119		359	-2.49745		359	36.6046		359	-4.62836		359	4.41056		359	-27.6871
360	11.3727		360	-2.5933		360	36.4897		360	-4.62602		360	4.47128		360	-27.7033
361	10.9504		361	-2.67325		361	36.3263		361	-4.62235		361	4.55874		361	-27.7197
362	10.9034		362	-2.741		362	36.1144		362	-4.61766		362	4.64585		362	-27.7363
363	11.0128		363	-2.80992		363	35.9967		363	-4.61103		363	4.74236		363	-27.753
364	10.9664		364	-2.89722		364	36.0578		364	-4.60826		364	4.82601		364	-27.7699
365	10.6382		365	-3.01087		365	36.156		365	-4.61854		365	4.79597		365	-27.7869
366	10.1367		366	-3.14368		366	36.1603		366	-4.63905		366	4.66389		366	-27.804
367	9.72009		367	-3.28623		367	36.1429		367	-4.65605		367	4.58894		367	-27.8212
368	9.57303		368	-3.44018		368	36.2304		368	-4.66221		368	4.62466		368	-27.8385
369	9.63018		369	-3.60785		369	36.4004		369	-4.66207		369	4.65883		369	-27.8558
370	9.69843		370	-3.78033		370	36.5192		370	-4.66258		370	4.59596		370	-27.8731
371	9.68524		371	-3.94882		371	36.5209		371	-4.66585		371	4.45434		371	-27.8905
372	9.66815		372	-4.11477		372	36.4687		372	-4.66868		372	4.33713		372	-27.9078
373	9.78563		373	-4.28247		373	36.4364		373	-4.66743		373	4.32405		373	-27.9252
374	10.0434		374	-4.45371		374	36.4122		374	-4.66302		374	4.3823		374	-27.9427
375	10.2625		375	-4.63126		375	36.3965		375	-4.65813		375	4.4316		375	-27.96
376	10.2204		376	-4.8148		376	36.4207		376	-4.65172		376	4.43495		376	-27.9774
377	9.85161		377	-4.99769		377	36.448		377	-4.64059		377	4.41245		377	-27.9948
378	9.39885		378	-5.17476		378	36.4312		378	-4.62295		378	4.3913		378	-28.0121
379	9.23259		379	-5.3455		379	36.377		379	-4.59947		379	4.43404		379	-28.0294
380	9.44207		380	-5.50798		380	36.2932		380	-4.57354		380	4.58573		380	-28.0467
381	9.79833		381	-5.6584		381	36.1923		381	-4.5517		381	4.71666		381	-28.0639
382	10.1407		382	-5.79589		382	36.1086		382	-4.53959		382	4.70882		382	-28.0811
383	10.4836		383	-5.92368		383	36.0799		383	-4.5359		383	4.67135		383	-28.0982
384	10.8117		384	-6.04504		384	36.1227		384	-4.53717		384	4.73446		384	-28.1151
385	10.9823		385	-6.16003		385	36.2092		385	-4.54164		385	4.79929		385	-28.132
386	10.8978		386	-6.27092		386	36.2846		386	-4.54711		386	4.71261		386	-28.1487
387	10.7229		387	-6.38641		387	36.3316		387	-4.55272		387	4.51953		387	-28.1653
388	10.5748		388	-6.51427		388	36.3369		388	-4.55953		388	4.36777		388	-28.1817
389	10.4001		389	-6.65357		389	36.2692		389	-4.57031		389	4.35749		389	-28.1978
390	10.3084		390	-6.79895		390	36.1828		390	-4.58768		390	4.4684		390	-28.2136
391	10.4284		391	-6.94595		391	36.1949		391	-4.60927		391	4.56996		391	-28.2292
392	10.5756		392	-7.09039		392	36.3013		392	-4.62999		392	4.57726		392	-28.2443
393	10.4947		393	-7.23172		393	36.3651		393	-4.64684		393	4.50612		393	-28.2591
394	10.2186		394	-7.3772		394	36.3695		394	-4.65799		394	4.40124		394	-28.2734
395	10.0027		395	-7.53503		395	36.3883		395	-4.66114		395	4.33545		395	-28.2872
396	10.0118		396	-7.7019		396	36.3994		396	-4.65486		396	4.33547		396	-28.3004
397	10.106		397	-7.86557		397	36.3765		397	-4.64238		397	4.33578		397	-28.313
398	10.1031		398	-8.01911		398	36.2846		398	-4.63012		398	4.28276		398	-28.3249
399	10.0318		399	-8.16297		399	36.0894		399	-4.61873		399	4.24019		399	-28.3361
400	10.0221		400	-8.29631		400	35.8917		400	-4.6037		400	4.33858		400	-28.3465
401	10.2052		401	-8.41356		401	35.8067		401	-4.5847		401	4.53117		401	-28.356
402	10.6111		402	-8.51355		402	35.7984		402	-4.56442		402	4.62829		402	-28.3647
403	11.0638		403	-8.60576		403	35.8095		403	-4.54675		403	4.61169		403	-28.3724
404	11.4071		404	-8.69789		404	35.8673		404	-4.53871		404	4.61789		404	-28.3791
405	11.7296		405	-8.78618		405	35.9829		405	-4.54189		405	4.64541		405	-28.3848
406	12.019		406	-8.86729		406	36.092		406	-4.54887		406	4.65037		406	-28.3895
407	11.9884		407	-8.94591		407	36.108		407	-4.5525		407	4.67355		407	-28.393
408	11.4935		408	-9.02826		408	35.9941		408	-4.55285		408	4.68384		408	-28.3954
409	10.7995		409	-9.12065		409	35.7926		409	-4.55627		409	4.62021		409	-28.3966
410	10.2897		410	-9.22825		410	35.652		410	-4.56779		410	4.4922		410	-28.3967
411	10.0649		411	-9.34982		411	35.7004		411	-4.58634		411	4.33287		411	-28.3956
412	9.97337		412	-9.47921		412	35.8663		412	-4.60706		412	4.20168		412	-28.3933
413	9.93984		413	-9.61169		413	35.9897		413	-4.62612		413	4.14194		413	-28.3898
414	10.0048		414	-9.74663		414	36.0608		414	-4.6436		414	4.12256		414	-28.3852
415	10.1558		415	-9.88471		415	36.15		415	-4.66086		415	4.13482		415	-28.3793
416	10.3346		416	-10.0184		416	36.238		416	-4.6759		416	4.21232		416	-28.3723
417	10.4776		417	-10.1278		417	36.2671		417	-4.68261		417	4.349		417	-28.3641
418	10.5335		418	-10.197		418	36.1812		418	-4.6745		418	4.50856		418	-28.3548
419	10.5499		419	-10.2378		419	35.9954		419	-4.65126		419	4.6328		419	-28.3444
420	10.5982		420	-10.2846		420	35.8195		420	-4.61994		420	4.71602		420	-28.3329
421	10.5859		421	-10.3584		421	35.7011		421	-4.5893		421	4.79132		421	-28.3203
422	10.5066		422	-10.4527		422	35.6193		422	-4.56471		422	4.74659		422	-28.3068
423	10.5742		423	-10.5471		423	35.6147		423	-4.54758		423	4.52644		423	-28.2922
424	10.7702		424	-10.6213		424	35.7338		424	-4.53993		424	4.34471		424	-28.2767
425	10.8939		425	-10.6634		425	35.9104		425	-4.54173		425	4.37429		425	-28.2602
426	10.9871		426	-10.6749		426	36.0725		426	-4.54646		426	4.51657		426	-28.2429
427	11.245		427	-10.6662		427	36.1813		427	-4.5495		427	4.65208		427	-28.2248
428	11.6364		428	-10.6502		428	36.2046		428	-4.55373		428	4.82292		428	-28.2059
429	11.8619		429	-10.6384		429	36.2131		429	-4.56269		429	4.97228		429	-28.1863
430	11.7457		430	-10.6366		430	36.2794		430	-4.57676		430	4.92246		430	-28.166
431	11.3752		431	-10.6451		431	36.3426		431	-4.59433		431	4.72142		431	-28.1451
432	10.9459		432	-10.6596		432	36.3431		432	-4.61261		432	4.58351		432	-28.1236
433	10.6992		433	-10.675		433	36.3048		433	-4.62938		433	4.57074		433	-28.1016
434	10.7717		434	-10.6895		434	36.2686		434	-4.64187		434	4.62649		434	-28.0792
435	11.0623		435	-10.7001		435	36.2612		435	-4.64544		435	4.71377		435	-28.0563
436	11.2825		436	-10.704		436	36.2567		436	-4.63663		436	4.80225		436	-28.0332
437	11.2092		437	-10.7058		437	36.2298		437	-4.61566		437	4.86923		437	-28.0098
438	10.9794		438	-10.7163		438	36.2166		438	-4.58702		438	4.92444		438	-27.9861
439	10.8995		439	-10.75		439	36.2305		439	-4.55739		439	4.9373		439	-27.9624
440	10.9971		440	-10.8195		440	36.2032		440	-4.53113		440	4.83707		440	-27.9385
441	11.1053		441	-10.9204		441	36.1		441	-4.50881		441	4.67706		441	-27.9147
442	11.1985		442	-11.0311		442	36.0052		442	-4.49068		442	4.59313		442	-27.8909
443	11.2786		443	-11.1339		443	35.9883		443	-4.47661		443	4.59385		443	-27.8672
444	11.295		444	-11.2265		444	36.0099		444	-4.46651		444	4.60477		444	-27.8437
445	11.2882		445	-11.3136		445	36.0698		445	-4.46494		445	4.57352		445	-27.8204
446	11.2627		446	-11.397		446	36.195		446	-4.47577		446	4.54459		446	-27.7975
447	11.1701		447	-11.4778		447	36.3024		447	-4.49563		447	4.62262		447	-27.7749
448	11.0943		448	-11.5574		448	36.349		448	-4.52026		448	4.75175		448	-27.7527
449	11.1366		449	-11.6293		449	36.4136		449	-4.54703		449	4.81929		449	-27.7309
450	11.195		450	-11.6791		450	36.5491		450	-4.57112		450	4.82865		450	-27.7097
451	11.1407		451	-11.7005		451	36.6906		451	-4.58828		451	4.78347		451	-27.6891
452	11.0157		452	-11.7064		452	36.7193		452	-4.5996		452	4.64243		452	-27.6691
453	10.8599		453	-11.7125		453	36.595		453	-4.60796		453	4.46589		453	-27.6499
454	10.7109		454	-11.7219		454	36.4144		454	-4.61306		454	4.40136		454	-27.6313
455	10.723		455	-11.7335		455	36.3178		455	-4.6141		455	4.47583		455	-27.6135
456	10.835		456	-11.7574		456	36.331		456	-4.61066		456	4.57397		456	-27.5966
457	10.7275		457	-11.8145		457	36.3482		457	-4.60341		457	4.58574		457	-27.5805
458	10.3795		458	-11.9126		458	36.273		458	-4.59509		458	4.53136		458	-27.5653
459	10.1073		459	-12.034		459	36.1804		459	-4.58645		459	4.51579		459	-27.5512
460	10.1608		460	-12.1556		460	36.1808		460	-4.57522		460	4.55551		460	-27.538
461	10.5486		461	-12.2645		461	36.1886		461	-4.56093		461	4.56701		461	-27.5259
462	11.0676		462	-12.3591		462	36.1003		462	-4.54741		462	4.56481		462	-27.5149
463	11.4676		463	-12.4437		463	36.0386		463	-4.53983		463	4.6719		463	-27.505
464	11.6325		464	-12.5219		464	36.1603		464	-4.54056		464	4.85881		464	-27.4963
465	11.6351		465	-12.5984		465	36.3824		465	-4.54657		465	4.97051		465	-27.4887
466	11.4757		466	-12.6791		466	36.5344		466	-4.5536		466	4.98503		466	-27.4824
467	11.0587		467	-12.7634		467	36.5654		467	-4.56048		467	4.97317		467	-27.4772
468	10.5801		468	-12.848		468	36.5245		468	-4.56703		468	4.94929		468	-27.4733
469	10.4168		469	-12.938		469	36.4943		469	-4.57356		469	4.87524		469	-27.4707
470	10.6302		470	-13.0417		470	36.5358		470	-4.58041		470	4.73764		470	-27.4693
471	10.861		471	-13.1601		471	36.6271		471	-4.58584		471	4.61653		471	-27.4691
472	10.7941		472	-13.2863		472	36.6672		472	-4.5877		472	4.60454		472	-27.4701
473	10.6041		473	-13.4104		473	36.5487		473	-4.58776		473	4.64851		473	-27.4724
474	10.6335		474	-13.5272		474	36.3413		474	-4.58946		474	4.5704		474	-27.4758
475	10.8481		475	-13.6352		475	36.2645		475	-4.59216		475	4.36123		475	-27.4803
476	11.0003		476	-13.7316		476	36.3449		476	-4.59351		476	4.22763		476	-27.486
477	10.9433		477	-13.8123		477	36.3932		477	-4.59313		477	4.26893		477	-27.4927
478	10.7176		478	-13.8787		478	36.3002		478	-4.5902		478	4.4089		478	-27.5005
479	10.5406		479	-13.938		479	36.1273		479	-4.58204		479	4.52699		479	-27.5091
480	10.545		480	-13.9956		480	35.9813		480	-4.56942		480	4.65295		480	-27.5187
481	10.6765		481	-14.0492		481	35.9317		481	-4.55632		481	4.94621		481	-27.5292
482	10.8403		482	-14.0927		482	35.9661		482	-4.54142		482	5.29204		482	-27.5404
483	10.9702		483	-14.114		483	35.9964		483	-4.51987		483	5.36368		483	-27.5523
484	11.0631		484	-14.0958		484	35.9792		484	-4.49677		484	5.15542		484	-27.5649
485	11.2256		485	-14.0331		485	35.9506		485	-4.48432		485	4.95363		485	-27.5781
486	11.5201		486	-13.942		486	35.9792		486	-4.48634		486	4.86254		486	-27.5918
487	11.8478		487	-13.8413		487	36.1138		487	-4.49872		487	4.79788		487	-27.606
488	12.2408		488	-13.7374		488	36.3246		488	-4.51788		488	4.71193		488	-27.6206
489	12.7854		489	-13.6243		489	36.5433		489	-4.53982		489	4.61395		489	-27.6356
490	13.2457		490	-13.4957		490	36.7242		490	-4.56016		490	4.56906		490	-27.6509
491	13.393		491	-13.3563		491	36.7932		491	-4.5777		491	4.62076		491	-27.6665
492	13.288		492	-13.2124		492	36.664		492	-4.59254		492	4.68678		492	-27.6823
493	13.0798		493	-13.0602		493	36.3842		493	-4.6041		493	4.66432		493	-27.6983
494	12.9454		494	-12.8926		494	36.1422		494	-4.61111		494	4.54675		494	-27.7145
495	12.9749		495	-12.7098		495	36.0759		495	-4.61066		495	4.42098		495	-27.7308
496	13.0093		496	-12.5192		496	36.1188		496	-4.60163		496	4.37247		496	-27.7472
497	12.7958		497	-12.329		497	36.0748		497	-4.58697		497	4.37555		497	-27.7637
498	12.3816		498	-12.1417		498	35.8924		498	-4.56977		498	4.38592		498	-27.7803
499	12.1133		499	-11.9486		499	35.7597		499	-4.55004		499	4.45395		499	-27.7969
500	12.1378		500	-11.7374		500	35.8188		500	-4.5278		500	4.5513		500	-27.8135
501	12.3142		501	-11.5066		501	35.9672		501	-4.50786		501	4.57866		501	-27.8302
502	12.6316		502	-11.2711		502	36.052		502	-4.49512		502	4.5904		502	-27.8468
503	13.1485		503	-11.0575		503	36.0418		503	-4.48756		503	4.6884		503	-27.8634
504	13.6825		504	-10.8886		504	35.9891		504	-4.48196		504	4.83598		504	-27.88
505	13.9521		505	-10.7627		505	35.9503		505	-4.48109		505	4.90185		505	-27.8965
506	13.8334		506	-10.6599		506	35.9129		506	-4.4898		506	4.86078		506	-27.9129
507	13.4352		507	-10.5653		507	35.8307		507	-4.50785		507	4.82431		507	-27.9293
508	12.9237		508	-10.4754		508	35.7384		508	-4.52911		508	4.87145		508	-27.9457
509	12.4029		509	-10.3957		509	35.6922		509	-4.54798		509	4.96457		509	-27.9619
510	11.9135		510	-10.3391		510	35.6847		510	-4.56589		510	5.02147		510	-27.978
511	11.4224		511	-10.3176		511	35.7313		511	-4.58448		511	5.00497		511	-27.994
512	10.9817		512	-10.3325		512	35.9053		512	-4.59789		512	4.90919		512	-28.0099
513	10.7091		513	-10.3678		513	36.2409		513	-4.60193		513	4.74819		513	-28.0256
514	10.5847		514	-10.3994		514	36.6589		514	-4.60376		514	4.54929		514	-28.0412
515	10.5523		515	-10.4117		515	36.9729		515	-4.6116		515	4.38787		515	-28.0566
516	10.6037		516	-10.405		516	37.0871		516	-4.62243		516	4.33593		516	-28.0719
517	10.7011		517	-10.3884		517	37.011		517	-4.62656		517	4.36542		517	-28.087
518	10.8234		518	-10.3689		518	36.6352		518	-4.6194		518	4.46181		518	-28.1018
519	10.9412		519	-10.3451		519	35.877		519	-4.60571		519	4.6496		519	-28.1165
520	10.968		520	-10.3103		520	35.042		520	-4.5919		520	4.86503		520	-28.131
521	10.8845		521	-10.2584		521	34.66		521	-4.58117		521	5.02256		521	-28.1452
522	10.8359		522	-10.1908		522	34.874		522	-4.57458		522	5.09303		522	-28.1591
523	11.0108		523	-10.1177		523	35.3213		523	-4.56974		523	5.09368		523	-28.1728
524	11.4644		524	-10.0459		524	35.6387		524	-4.56428		524	5.08817		524	-28.1862
525	12.1158		525	-9.97345		525	35.7793		525	-4.56113		525	5.14367		525	-28.1992
526	12.7425		526	-9.90017		526	35.8969		526	-4.56466		526	5.29054		526	-28.212
527	13.0412		527	-9.83288		527	36.0798		527	-4.57375		527	5.39195		527	-28.2244
528	12.9375		528	-9.77881		528	36.2386		528	-4.58335		528	5.2311		528	-28.2364
529	12.5911		529	-9.74307		529	36.3127		529	-4.59124		529	4.9034		529	-28.248
530	12.1815		530	-9.72979		530	36.4273		530	-4.59748		530	4.66182		530	-28.2591
531	11.8366		531	-9.73159		531	36.6853		531	-4.60194		531	4.55083		531	-28.2698
532	11.5225		532	-9.72732		532	37.0031		532	-4.60539		532	4.47315		532	-28.2799
533	11.1881		533	-9.70302		533	37.2073		533	-4.60988		533	4.4033		533	-28.2896
534	10.9774		534	-9.66398		534	37.2397		534	-4.61572		534	4.42768		534	-28.2986
535	11.0538		535	-9.62413		535	37.2212		535	-4.61951		535	4.56082		535	-28.3071
536	11.3459		536	-9.59042		536	37.2203		536	-4.61702		536	4.68395		536	-28.3149
537	11.5834		537	-9.55861		537	37.2309		537	-4.60721		537	4.69821		537	-28.322
538	11.544		538	-9.523		538	37.2634		538	-4.59345		538	4.65934		538	-28.3284
539	11.1911		539	-9.48291		539	37.2581		539	-4.57915		539	4.67161		539	-28.3341
540	10.7146		540	-9.43845		540	37.1464		540	-4.56381		540	4.72823		540	-28.339
541	10.4219		541	-9.39026		541	37.003		541	-4.54634		541	4.76284		541	-28.3431
542	10.3604		542	-9.34344		542	36.9316		542	-4.52969		542	4.73163		542	-28.3464
543	10.3027		543	-9.30371		543	36.9374		543	-4.51829		543	4.65241		543	-28.3489
544	10.1914		544	-9.27006		544	36.9291		544	-4.51347		544	4.56383		544	-28.3505
545	10.1738		545	-9.23639		545	36.8478		545	-4.51523		545	4.4761		545	-28.3513
546	10.2517		546	-9.19782		546	36.7696		546	-4.5235		546	4.43605		546	-28.3513
547	10.2758		547	-9.15006		547	36.797		547	-4.53638		547	4.45562		547	-28.3504
548	10.2843		548	-9.09212		548	36.9307		548	-4.55155		548	4.46024		548	-28.3487
549	10.5016		549	-9.03428		549	37.078		549	-4.56877		549	4.41125		549	-28.3463
550	10.9453		550	-8.98949		550	37.1657		550	-4.58818		550	4.38592		550	-28.343
551	11.3515		551	-8.95824		551	37.2027		551	-4.60508		551	4.50556		551	-28.339
552	11.5032		552	-8.93368		552	37.2274		552	-4.6133		552	4.77386		552	-28.3343
553	11.4339		553	-8.91418		553	37.1741		553	-4.61261		553	5.06108		553	-28.3288
554	11.2472		554	-8.90102		554	36.9347		554	-4.60551		554	5.22415		554	-28.3228
555	11.0384		555	-8.89013		555	36.5725		555	-4.59473		555	5.23337		555	-28.3161
556	10.9662		556	-8.8715		556	36.2757		556	-4.58579		556	5.19025		556	-28.3088
557	11.0073		557	-8.8368		557	36.1266		557	-4.58288		557	5.13948		557	-28.301
558	10.9109		558	-8.7881		558	36.0707		558	-4.58227		558	5.03683		558	-28.2926
559	10.6251		559	-8.73729		559	36.07		559	-4.57551		559	4.88772		559	-28.2837
560	10.3905		560	-8.6951		560	36.1227		560	-4.55947		560	4.77491		560	-28.2744
561	10.3757		561	-8.65952		561	36.164		561	-4.53841		561	4.80005		561	-28.2646
562	10.6664		562	-8.61959		562	36.1652		562	-4.51676		562	4.9539		562	-28.2545
563	11.3049		563	-8.57002		563	36.2304		563	-4.49624		563	5.11101		563	-28.2439
564	12.0329		564	-8.51571		564	36.4141		564	-4.47932		564	5.21422		564	-28.2329
565	12.5777		565	-8.46495		565	36.5792		565	-4.46797		565	5.2747		565	-28.2215
566	12.9299		566	-8.4247		566	36.5399		566	-4.4622		566	5.29821		566	-28.2098
567	13.0376		567	-8.39681		567	36.2844		567	-4.46245		567	5.32374		567	-28.1978
568	12.7826		568	-8.37639		568	35.9612		568	-4.4694		568	5.33841		568	-28.1853
569	12.2202		569	-8.35813		569	35.7288		569	-4.48411		569	5.30837		569	-28.1726
570	11.5006		570	-8.33989		570	35.7077		570	-4.50661		570	5.33401		570	-28.1594
571	10.7428		571	-8.32325		571	35.8806		571	-4.53059		571	5.48461		571	-28.146
572	10.1576		572	-8.31232		572	36.0608		572	-4.54418		572	5.58035		572	-28.1322
573	9.9981		573	-8.31042		573	36.1279		573	-4.54283		573	5.49829		573	-28.1181
574	10.2847		574	-8.31748		574	36.1257		574	-4.53546		574	5.37799		574	-28.1037
575	10.7524		575	-8.32895		575	36.1248		575	-4.53299		575	5.32708		575	-28.0889
576	11.1157		576	-8.3403		576	36.1223		576	-4.53739		576	5.30452		576	-28.0739
577	11.3317		577	-8.35445		577	36.0606		577	-4.54334		577	5.19334		577	-28.0586
578	11.4241		578	-8.37927		578	35.9214		578	-4.54559		578	4.98977		578	-28.0431
579	11.2528		579	-8.42018		579	35.7538		579	-4.54103		579	4.86932		579	-28.0274
580	10.7733		580	-8.48233		580	35.6435		580	-4.52852		580	4.91244		580	-28.0114
581	10.3064		581	-8.56983		581	35.6356		581	-4.51139		581	4.98125		581	-27.9953
582	10.2072		582	-8.67877		582	35.7211		582	-4.49581		582	4.9399		582	-27.9791
583	10.5143		583	-8.80039		583	35.8845		583	-4.48557		583	4.84624		583	-27.9628
584	11.067		584	-8.9276		584	36.0335		584	-4.48185		584	4.83018		584	-27.9465
585	11.6178		585	-9.05599		585	36.0646		585	-4.48658		585	4.86268		585	-27.9302
586	11.9214		586	-9.18523		586	36.0005		586	-4.49858		586	4.83343		586	-27.9139
587	11.9113		587	-9.31658		587	35.8921		587	-4.51031		587	4.78814		587	-27.8978
588	11.682		588	-9.4498		588	35.7819		588	-4.51774		588	4.80101		588	-27.8818
589	11.405		589	-9.5863		589	35.7202		589	-4.52556		589	4.80864		589	-27.866
590	11.2		590	-9.72752		590	35.6915		590	-4.53934		590	4.77401		590	-27.8505
591	11.0134		591	-9.86949		591	35.6688		591	-4.55929		591	4.74539		591	-27.8353
592	10.8027		592	-10.0071		592	35.6972		592	-4.58249		592	4.71495		592	-27.8205
593	10.6809		593	-10.1402		593	35.8087		593	-4.60351		593	4.64431		593	-27.8061
594	10.7552		594	-10.2717		594	35.9613		594	-4.61422		594	4.573		594	-27.7922
595	10.9127		595	-10.4037		595	36.1055		595	-4.61561		595	4.52965		595	-27.7788
596	10.8974		596	-10.5367		596	36.2143		596	-4.61768		596	4.49783		596	-27.766
597	10.6325		597	-10.6718		597	36.2605		597	-4.62223		597	4.45986		597	-27.7538
598	10.2558		598	-10.8101		598	36.2234		598	-4.62108		598	4.44383		598	-27.7423
599	9.84595		599	-10.9504		599	36.1133		599	-4.60879		599	4.50793		599	-27.7314
600	9.48711		600	-11.0922		600	35.9592		600	-4.58755		600	4.65391		600	-27.7213
601	9.41921		601	-11.235		601	35.7708		601	-4.5622		601	4.79261		601	-27.712
602	9.71779		602	-11.3746		602	35.582		602	-4.53597		602	4.83951		602	-27.7035
603	10.1844		603	-11.5068		603	35.4836		603	-4.51366		603	4.85707		603	-27.6957
604	10.5565		604	-11.6313		604	35.5404		604	-4.50255		604	4.95199		604	-27.6888
605	10.6133		605	-11.7501		605	35.7408		605	-4.50345		605	5.06246		605	-27.6827
606	10.4596		606	-11.864		606	35.996		606	-4.51014		606	5.02685		606	-27.6775
607	10.5225		607	-11.9733		607	36.1556		607	-4.51967		607	4.86597		607	-27.6731
608	10.9136		608	-12.0828		608	36.1405		608	-4.53091		608	4.78837		608	-27.6696
609	11.3043		609	-12.1987		609	36.0481		609	-4.54204		609	4.88081		609	-27.6668
610	11.4137		610	-12.3203		610	36.0352		610	-4.55504		610	4.97833		610	-27.6648
611	11.242		611	-12.4415		611	36.0888		611	-4.57003		611	4.92024		611	-27.6637
612	10.9992		612	-12.5605		612	36.0874		612	-4.58069		612	4.78745		612	-27.6632
613	10.8185		613	-12.6817		613	36.0538		613	-4.58283		613	4.69441		613	-27.6634
614	10.6531		614	-12.8091		614	36.1192		614	-4.5775		614	4.5896		614	-27.6643
615	10.5752		615	-12.9422		615	36.3387		615	-4.56771		615	4.43246		615	-27.6658
616	10.6166		616	-13.0761		616	36.6002		616	-4.55907		616	4.33975		616	-27.6678
617	10.5669		617	-13.2064		617	36.7026		617	-4.55542		617	4.42007		617	-27.6704
618	10.3393		618	-13.3316		618	36.5331		618	-4.55511		618	4.55879		618	-27.6733
619	10.0558		619	-13.4528		619	36.1309		619	-4.5526		619	4.57594		619	-27.6767
620	9.81595		620	-13.5723		620	35.6614		620	-4.54069		620	4.52		620	-27.6803
621	9.69584		621	-13.6875		621	35.3269		621	-4.52092		621	4.55045		621	-27.6842
622	9.82271		622	-13.7835		622	35.2302		622	-4.50801		622	4.64447		622	-27.6883
623	10.2285		623	-13.8374		623	35.3057		623	-4.51106		623	4.68507		623	-27.6925
624	10.7395		624	-13.8393		624	35.4194		624	-4.52322		624	4.67656		624	-27.6968
625	11.1686		625	-13.8032		625	35.5384		625	-4.53329		625	4.67107		625	-27.701
626	11.4387		626	-13.7522		626	35.7067		626	-4.53551		626	4.70864		626	-27.7052
627	11.5165		627	-13.703		627	35.9281		627	-4.53131		627	4.7737		627	-27.7092
628	11.5005		628	-13.6635		628	36.1261		628	-4.52667		628	4.81209		628	-27.7131
629	11.5606		629	-13.634		629	36.2162		629	-4.52719		629	4.81576		629	-27.7167
630	11.6796		630	-13.6086		630	36.2168		630	-4.53554		630	4.78055		630	-27.7201
631	11.7254		631	-13.5803		631	36.2017		631	-4.55124		631	4.68473		631	-27.7231
632	11.6956		632	-13.548		632	36.2263		632	-4.57258		632	4.58607		632	-27.7257
633	11.6652		633	-13.5166		633	36.3445		633	-4.59648		633	4.57942		633	-27.728
634	11.6278		634	-13.4893		634	36.5176		634	-4.61628		634	4.60997		634	-27.7298
635	11.5423		635	-13.4654		635	36.6315		635	-4.62639		635	4.57681		635	-27.7312
636	11.4016		636	-13.4403		636	36.6977		636	-4.62703		636	4.47335		636	-27.7322
637	11.178		637	-13.4087		637	36.7432		637	-4.62516		637	4.31754		637	-27.7326
638	10.8604		638	-13.3708		638	36.6796		638	-4.62771		638	4.14829		638	-27.7326
639	10.5005		639	-13.3228		639	36.4933		639	-4.6342		639	4.08069		639	-27.7321
640	10.1362		640	-13.247		640	36.2805		640	-4.63989		640	4.17835		640	-27.7312
641	9.81666		641	-13.1228		641	36.1035		641	-4.63976		641	4.3552		641	-27.7298
642	9.64193		642	-12.9539		642	35.9796		642	-4.63074		642	4.5383		642	-27.7279
643	9.64678		643	-12.7742		643	35.9314		643	-4.61468		643	4.7314		643	-27.7257
644	9.80922		644	-12.6227		644	35.9235		644	-4.60019		644	4.90466		644	-27.7231
645	10.1838		645	-12.5239		645	35.8631		645	-4.59456		645	4.97105		645	-27.7202
646	10.7173		646	-12.4839		646	35.7645		646	-4.59459		646	4.90148		646	-27.717
647	11.1065		647	-12.4921		647	35.7896		647	-4.59441		647	4.787		647	-27.7135
648	11.1014		648	-12.5311		648	35.9965		648	-4.59538		648	4.70698		648	-27.7098
649	10.7837		649	-12.5875		649	36.2013		649	-4.60093		649	4.65562		649	-27.7061
650	10.4502		650	-12.6508		650	36.2592		650	-4.60988		650	4.60149		650	-27.7022
651	10.3453		651	-12.7128		651	36.2659		651	-4.61814		651	4.52535		651	-27.6984
652	10.4557		652	-12.7718		652	36.351		652	-4.62426		652	4.46161		652	-27.6947
653	10.5837		653	-12.8292		653	36.4525		653	-4.62996		653	4.44185		653	-27.6911
654	10.6477		654	-12.8886		654	36.4658		654	-4.63512		654	4.39214		654	-27.6878
655	10.6661		655	-12.9541		655	36.4521		655	-4.63699		655	4.27698		655	-27.6847
656	10.6228		656	-13.0251		656	36.4884		656	-4.63297		656	4.20265		656	-27.682
657	10.5792		657	-13.0956		657	36.5296		657	-4.62251		657	4.24193		657	-27.6798
658	10.577		658	-13.1533		658	36.5257		658	-4.61058		658	4.32104		658	-27.6782
659	10.5529		659	-13.1849		659	36.4878		659	-4.60539		659	4.33051		659	-27.6771
660	10.5116		660	-13.1894		660	36.4216		660	-4.60797		660	4.32745		660	-27.6767
661	10.5435		661	-13.1769		661	36.3001		661	-4.60992		661	4.46643		661	-27.677
662	10.7139		662	-13.1619		662	36.1522		662	-4.60134		662	4.71713		662	-27.6781
663	10.9838		663	-13.1553		663	36.1337		663	-4.58048		663	4.86822		663	-27.68
664	11.1813		664	-13.1503		664	36.3083		664	-4.55775		664	4.82826		664	-27.6828
665	11.1889		665	-13.1317		665	36.4943		665	-4.54472		665	4.71252		665	-27.6866
666	11.0885		666	-13.1001		666	36.5252		666	-4.54364		666	4.67798		666	-27.6912
667	10.9324		667	-13.0671		667	36.4116		667	-4.55282		667	4.75919		667	-27.6968
668	10.6394		668	-13.0394		668	36.1953		668	-4.56816		668	4.81817		668	-27.7034
669	10.3532		669	-13.0187		669	35.9648		669	-4.58152		669	4.74689		669	-27.7109
670	10.3064		670	-13.0045		670	35.9096		670	-4.5909		670	4.57874		670	-27.7193
671	10.2963		671	-12.9955		671	36.0487		671	-4.59983		671	4.41209		671	-27.7287
672	10.0479		672	-12.9891		672	36.1756		672	-4.60912		672	4.37736		672	-27.7389
673	9.74208		673	-12.9823		673	36.171		673	-4.62021		673	4.48294		673	-27.7499
674	9.70959		674	-12.975		674	36.0947		674	-4.63466		674	4.60555		674	-27.7617
675	10.0333		675	-12.9705		675	36.0503		675	-4.64807		675	4.67405		675	-27.7742
676	10.5131		676	-12.9691		676	36.0676		676	-4.65677		676	4.63701		676	-27.7874
677	10.7795		677	-12.9679		677	36.1		677	-4.6612		677	4.51492		677	-27.8011
678	10.6667		678	-12.968		678	36.1076		678	-4.66067		678	4.46468		678	-27.8152
679	10.3459		679	-12.974		679	36.1052		679	-4.65483		679	4.50495		679	-27.8298
680	9.94785		680	-12.9844		680	36.116		680	-4.64491		680	4.48828		680	-27.8447
681	9.49605		681	-12.991		681	36.1065		681	-4.63215		681	4.39066		681	-27.8597
682	9.1708		682	-12.9895		682	36.0611		682	-4.61816		682	4.32172		682	-27.8749
683	9.14669		683	-12.9812		683	36.0817		683	-4.6057		683	4.38677		683	-27.8901
684	9.36957		684	-12.967		684	36.2358		684	-4.5971		684	4.6074		684	-27.9053
685	9.70289		685	-12.9474		685	36.4065		685	-4.59339		685	4.82173		685	-27.9203
686	10.0174		686	-12.9237		686	36.4502		686	-4.595		686	4.84844		686	-27.9352
687	10.1478		687	-12.8984		687	36.348		687	-4.59927		687	4.76805		687	-27.9498
688	10.0062		688	-12.8765		688	36.1837		688	-4.60129		688	4.74645		688	-27.964
689	9.68552		689	-12.8613		689	36.0917		689	-4.60144		689	4.76766		689	-27.9778
690	9.3744		690	-12.8488		690	36.1629		690	-4.60647		690	4.71868		690	-27.9913
691	9.27299		691	-12.8341		691	36.3255		691	-4.6199		691	4.54192		691	-28.0042
692	9.40081		692	-12.8167		692	36.3886		692	-4.63606		692	4.30146		692	-28.0167
693	9.58507		693	-12.802		693	36.2764		693	-4.64762		693	4.14258		693	-28.0286
694	9.73562		694	-12.8001		694	36.1742		694	-4.65347		694	4.14658		694	-28.04
695	9.87326		695	-12.8123		695	36.2745		695	-4.65306		695	4.25673		695	-28.0508
696	10.0031		696	-12.8243		696	36.4732		696	-4.64483		696	4.33768		696	-28.0611
697	10.0813		697	-12.8246		697	36.5495		697	-4.63282		697	4.4026		697	-28.0708
698	10.112		698	-12.8166		698	36.4714		698	-4.62084		698	4.56826		698	-28.08
699	10.1914		699	-12.8077		699	36.3154		699	-4.60723		699	4.78113		699	-28.0886
700	10.3123		700	-12.7978		700	36.1262		700	-4.59086		700	4.87226		700	-28.0967
701	10.3108		701	-12.7836		701	36.0018		701	-4.57591		701	4.78497		701	-28.1042
702	10.1337		702	-12.7645		702	36.0595		702	-4.56795		702	4.6575		702	-28.1113
703	9.90383		703	-12.7425		703	36.2974		703	-4.56717		703	4.66665		703	-28.1179
704	9.75134		704	-12.7182		704	36.6212		704	-4.57145		704	4.78349		704	-28.124
705	9.66551		705	-12.6917		705	36.9093		705	-4.57878		705	4.83526		705	-28.1297
706	9.59192		706	-12.6651		706	37.0551		706	-4.58568		706	4.79797		706	-28.135
707	9.59505		707	-12.643		707	37.0165		707	-4.59135		707	4.79394		707	-28.14
708	9.72235		708	-12.6291		708	36.8412		708	-4.6		708	4.84695		708	-28.1445
709	9.86909		709	-12.6229		709	36.6311		709	-4.61615		709	4.87838		709	-28.1488
710	9.9233		710	-12.6202		710	36.4299		710	-4.63879		710	4.886		710	-28.1527
711	9.94523		711	-12.6174		711	36.2238		711	-4.65903		711	4.89453		711	-28.1564
712	10.0325		712	-12.6147		712	36.0794		712	-4.66925		712	4.88047		712	-28.1598
713	10.1451		713	-12.6112		713	36.0749		713	-4.67361		713	4.8821		713	-28.163
714	10.2059		714	-12.6038		714	36.1391		714	-4.68103		714	4.9459		714	-28.1661
715	10.1625		715	-12.5898		715	36.1741		715	-4.69206		715	5.01721		715	-28.1689
716	9.93591		716	-12.5679		716	36.179		716	-4.70057		716	5.00607		716	-28.1717
717	9.52355		717	-12.5419		717	36.1626		717	-4.70323		717	4.86618		717	-28.1745
718	9.11673		718	-12.5185		718	36.1463		718	-4.70047		718	4.63964		718	-28.1771
719	8.91642		719	-12.4995		719	36.2457		719	-4.69147		719	4.4702		719	-28.1798
720	8.91169		720	-12.4813		720	36.5108		720	-4.6763		720	4.44463		720	-28.1825
721	8.97806		721	-12.4615		721	36.7897		721	-4.66071		721	4.50775		721	-28.1852
722	9.08209		722	-12.44		722	36.9514		722	-4.65086		722	4.61676		722	-28.1881
723	9.25331		723	-12.4142		723	37.0875		723	-4.64749		723	4.82158		723	-28.1911
724	9.5259		724	-12.3762		724	37.2584		724	-4.64857		724	5.12345		724	-28.1942
725	9.96336		725	-12.3231		725	37.3122		725	-4.65068		725	5.38725		725	-28.1976
726	10.4738		726	-12.2643		726	37.1412		726	-4.64895		726	5.47589		726	-28.2012
727	10.7345		727	-12.2114		727	36.8447		727	-4.6417		727	5.40915		727	-28.2051
728	10.5704		728	-12.1702		728	36.5421		728	-4.63412		728	5.33705		728	-28.2093
729	10.2328		729	-12.1431		729	36.27		729	-4.63386		729	5.30817		729	-28.2138
730	10.0018		730	-12.1257		730	36.0808		730	-4.64391		730	5.23718		730	-28.2186
731	9.74077		731	-12.1048		731	36.0312		731	-4.66103		731	5.16746		731	-28.2237
732	9.30983		732	-12.0568		732	36.1108		732	-4.67838		732	5.28146		732	-28.2293
733	8.97384		733	-11.9562		733	36.2421		733	-4.69185		733	5.57704		733	-28.2352
734	8.89303		734	-11.7923		734	36.3382		734	-4.70224		734	5.7666		734	-28.2414
735	8.86212		735	-11.5794		735	36.3528		735	-4.70897		735	5.62446		735	-28.248
736	8.7461		736	-11.3419		736	36.3007		736	-4.70933		736	5.27309		736	-28.2549
737	8.58172		737	-11.096		737	36.2427		737	-4.70397		737	4.98903		737	-28.2622
738	8.39975		738	-10.8505		738	36.1733		738	-4.69503		738	4.84694		738	-28.2697
739	8.25099		739	-10.618		739	36.0465		739	-4.68499		739	4.80088		739	-28.2775
740	8.19379		740	-10.4057		740	35.9416		740	-4.67923		740	4.86463		740	-28.2855
741	8.24905		741	-10.1994		741	35.9366		741	-4.67971		741	4.96656		741	-28.2936
742	8.50715		742	-9.98118		742	35.953		742	-4.68114		742	5.04041		742	-28.3019
743	8.94354		743	-9.75348		743	35.9319		743	-4.67896		743	5.15463		743	-28.3103
744	9.25849		744	-9.52913		744	35.8953		744	-4.67664		744	5.26677		744	-28.3187
745	9.33887		745	-9.31411		745	35.8707		745	-4.68072		745	5.24134		745	-28.327
746	9.36303		746	-9.11523		746	35.9205		746	-4.69014		746	5.08125		746	-28.3353
747	9.38531		747	-8.94711		747	36.0275		747	-4.69837		747	4.91429		747	-28.3434
748	9.37393		748	-8.81393		748	36.0093		748	-4.70376		748	4.86204		748	-28.3513
749	9.33411		749	-8.69808		749	35.8074		749	-4.71266		749	4.92825		749	-28.359
750	9.21537		750	-8.58796		750	35.6138		750	-4.73135		750	4.99697		750	-28.3664
751	8.986		751	-8.50294		751	35.5807		751	-4.75596		751	4.98213		751	-28.3734
752	8.64054		752	-8.46677		752	35.7128		752	-4.77705		752	4.90824		752	-28.38
753	8.26315		753	-8.47515		753	35.9349		753	-4.78823		753	4.82666		753	-28.3861
754	8.13651		754	-8.50841		754	36.1033		754	-4.78739		754	4.76145		754	-28.3918
755	8.4531		755	-8.554		755	36.1377		755	-4.77888		755	4.72257		755	-28.3971
756	9.04357		756	-8.60528		756	36.0988		756	-4.76867		756	4.70656		756	-28.4017
757	9.66639		757	-8.65349		757	36.0727		757	-4.75614		757	4.69375		757	-28.4059
758	10.2287		758	-8.69033		758	36.0476		758	-4.73785		758	4.65047		758	-28.4095
759	10.5899		759	-8.71394		759	35.953		759	-4.7156		759	4.58654		759	-28.4126
760	10.6647		760	-8.72692		760	35.8247		760	-4.69472		760	4.56615		760	-28.4151
761	10.603		761	-8.7322		761	35.7929		761	-4.67774		761	4.62025		761	-28.4171
762	10.5606		762	-8.73162		762	35.8778		762	-4.66341		762	4.73547		762	-28.4185
763	10.5328		763	-8.72532		763	35.9418		763	-4.6497		763	4.8512		763	-28.4195
764	10.4732		764	-8.71241		764	35.8991		764	-4.63768		764	4.88605		764	-28.4199
765	10.4558		765	-8.69365		765	35.8275		765	-4.63095		765	4.84635		765	-28.4199
766	10.6313		766	-8.67434		766	35.7625		766	-4.63124		766	4.7996		766	-28.4195
767	10.9325		767	-8.65933		767	35.6192		767	-4.63561		767	4.76593		767	-28.4186
768	11.0672		768	-8.65014		768	35.4093		768	-4.63915		768	4.73343		768	-28.4174
769	10.9297		769	-8.64936		769	35.2839		769	-4.64283		769	4.68237		769	-28.4158
770	10.7297		770	-8.65754		770	35.3903		770	-4.65327		770	4.53914		770	-28.4139
771	10.6949		771	-8.67041		771	35.7118		771	-4.67116		771	4.31932		771	-28.4118
772	10.9253		772	-8.68568		772	36.0254		772	-4.69083		772	4.20713		772	-28.4093
773	11.3254		773	-8.70437		773	36.1381		773	-4.70793		773	4.32128		773	-28.4067
774	11.5759		774	-8.7258		774	36.0842		774	-4.72011		774	4.59315		774	-28.4039
775	11.4051		775	-8.74708		775	36.0046		775	-4.728		775	4.86689		775	-28.401
776	10.8782		776	-8.76609		776	35.9893		776	-4.73332		776	4.99602		776	-28.3979
777	10.3331		777	-8.785		777	36.0326		777	-4.73487		777	4.91358		777	-28.3947
778	10.0157		778	-8.80836		778	36.0777		778	-4.73105		778	4.68866		778	-28.3914
779	9.90038		779	-8.8397		779	36.0766		779	-4.72201		779	4.48063		779	-28.388
780	9.88705		780	-8.87651		780	36.0251		780	-4.70832		780	4.39993		780	-28.3845
781	9.96653		781	-8.90847		781	35.963		781	-4.69152		781	4.47974		781	-28.3809
782	10.0548		782	-8.92702		782	35.9494		782	-4.67444		782	4.65719		782	-28.3773
783	9.97762		783	-8.93304		783	36.0297		783	-4.65777		783	4.78926		783	-28.3735
784	9.82052		784	-8.9332		784	36.1646		784	-4.6432		784	4.82521		784	-28.3696
785	9.79701		785	-8.93162		785	36.3141		785	-4.63596		785	4.80505		785	-28.3656
786	9.81604		786	-8.92718		786	36.5147		786	-4.63586		786	4.75957		786	-28.3615
787	9.75587		787	-8.91942		787	36.7446		787	-4.63708		787	4.75389		787	-28.3572
788	9.70087		788	-8.91474		788	36.8983		788	-4.63928		788	4.80392		788	-28.3527
789	9.67632		789	-8.91856		789	36.9295		789	-4.64791		789	4.81053		789	-28.3479
790	9.58355		790	-8.92589		790	36.8815		790	-4.66539		790	4.74342		790	-28.3429
791	9.34078		791	-8.93098		791	36.8034		791	-4.68765		791	4.64141		791	-28.3376
792	9.03681		792	-8.93817		792	36.7583		792	-4.70886		792	4.50801		792	-28.3319
793	8.869		793	-8.95639		793	36.7895		793	-4.72553		793	4.38731		793	-28.3259
794	8.9161		794	-8.99059		794	36.8232		794	-4.73544		794	4.35032		794	-28.3194
795	9.11094		795	-9.03657		795	36.7672		795	-4.73983		795	4.43046		795	-28.3126
796	9.30202		796	-9.08093		796	36.6089		796	-4.74308		796	4.63835		796	-28.3052
797	9.35822		797	-9.11122		797	36.3817		797	-4.74566		797	4.86571		797	-28.2973
798	9.34612		798	-9.12466		798	36.1475		798	-4.74422		798	4.90246		798	-28.2889
799	9.41465		799	-9.12651		799	35.9649		799	-4.73679		799	4.72622		799	-28.2799
800	9.54627		800	-9.12191		800	35.8259		800	-4.72215		800	4.55782		800	-28.2703
801	9.63471		801	-9.11021		801	35.6868		801	-4.70104		801	4.56089		801	-28.2602
802	9.67916		802	-9.0884		802	35.5754		802	-4.68149		802	4.67674		802	-28.2494
803	9.65266		803	-9.05494		803	35.5622		803	-4.67353		803	4.7709		803	-28.2381
804	9.45916		804	-9.00896		804	35.6281		804	-4.67748		804	4.81069		804	-28.2262
805	9.26947		805	-8.95336		805	35.722		805	-4.68412		805	4.82499		805	-28.2137
806	9.35319		806	-8.89757		806	35.7949		806	-4.68874		806	4.81678		806	-28.2006
807	9.56239		807	-8.85004		807	35.7962		807	-4.69492		807	4.76881		807	-28.1871
808	9.53237		808	-8.81347		808	35.7516		808	-4.70464		808	4.69669		808	-28.173
809	9.29554		809	-8.78815		809	35.6909		809	-4.71525		809	4.62685		809	-28.1585
810	9.21792		810	-8.77285		810	35.5934		810	-4.72432		810	4.53709		810	-28.1436
811	9.51941		811	-8.7615		811	35.4833		811	-4.72977		811	4.44384		811	-28.1283
812	10.1264		812	-8.74		812	35.445		812	-4.72907		812	4.43753		812	-28.1126
813	10.7105		813	-8.69181		813	35.5147		813	-4.72291		813	4.52562		813	-28.0967
814	10.9254		814	-8.61492		814	35.6153		814	-4.71519		814	4.59379		814	-28.0806
815	10.7941		815	-8.52215		815	35.6555		815	-4.71188		815	4.56558		815	-28.0643
816	10.618		816	-8.42407		816	35.6345		816	-4.71684		816	4.45903		816	-28.0478
817	10.5125		817	-8.32649		817	35.5906		817	-4.72619		817	4.36853		817	-28.0313
818	10.3889		818	-8.23073		818	35.5515		818	-4.73147		818	4.35851		818	-28.0146
819	10.2902		819	-8.13097		819	35.5707		819	-4.72641		819	4.35621		819	-27.998
820	10.4071		820	-8.02332		820	35.682		820	-4.70949		820	4.29403		820	-27.9814
821	10.7551		821	-7.91609		821	35.8123		821	-4.68402		821	4.22827		821	-27.9648
822	11.0399		822	-7.82787		822	35.8525		822	-4.65806		822	4.22335		822	-27.9482
823	10.9966		823	-7.7708		823	35.792		823	-4.64053		823	4.30129		823	-27.9318
824	10.7849		824	-7.73777		824	35.6993		824	-4.63452		824	4.49286		824	-27.9153
825	10.7532		825	-7.71503		825	35.6124		825	-4.6346		825	4.76853		825	-27.899
826	10.8508		826	-7.69975		826	35.5171		826	-4.63226		826	4.9812		826	-27.8827
827	10.7942		827	-7.69403		827	35.3671		827	-4.62452		827	4.99038		827	-27.8666
828	10.5715		828	-7.69685		828	35.1907		828	-4.61504		828	4.79315		828	-27.8504
829	10.3569		829	-7.70969		829	35.1156		829	-4.6097		829	4.54596		829	-27.8344
830	10.278		830	-7.73399		830	35.2247		830	-4.61365		830	4.4632		830	-27.8183
831	10.3455		831	-7.77076		831	35.4906		831	-4.62529		831	4.54158		831	-27.8023
832	10.4632		832	-7.83159		832	35.8288		832	-4.63772		832	4.58883		832	-27.7863
833	10.5314		833	-7.92806		833	36.166		833	-4.64886		833	4.58537		833	-27.7704
834	10.5278		834	-8.04912		834	36.441		834	-4.6588		834	4.64803		834	-27.7543
835	10.4396		835	-8.1692		835	36.6185		835	-4.66564		835	4.79592		835	-27.7383
836	10.2242		836	-8.27399		836	36.7146		836	-4.66811		836	4.90056		836	-27.7222
837	9.93207		837	-8.36769		837	36.7572		837	-4.66446		837	4.82259		837	-27.706
838	9.74033		838	-8.46		838	36.7639		838	-4.65458		838	4.6465		838	-27.6898
839	9.69048		839	-8.55506		839	36.7424		839	-4.64026		839	4.62037		839	-27.6734
840	9.67727		840	-8.65261		840	36.7284		840	-4.62144		840	4.77232		840	-27.657
841	9.71769		841	-8.74899		841	36.7476		841	-4.6009		841	4.83665		841	-27.6405
842	9.90452		842	-8.83802		842	36.7687		842	-4.58483		842	4.72199		842	-27.624
843	10.1948		843	-8.91638		843	36.7429		843	-4.57675		843	4.66534		843	-27.6073
844	10.3897		844	-8.9858		844	36.6289		844	-4.57885		844	4.78603		844	-27.5905
845	10.323		845	-9.04983		845	36.483		845	-4.58872		845	4.89434		845	-27.5736
846	10.0068		846	-9.11506		846	36.3916		846	-4.59909		846	4.85049		846	-27.5567
847	9.60713		847	-9.18999		847	36.2799		847	-4.60846		847	4.72319		847	-27.5396
848	9.30989		848	-9.27606		848	36.0058		848	-4.62065		848	4.60503		848	-27.5225
849	9.21094		849	-9.37052		849	35.6347		849	-4.63875		849	4.53509		849	-27.5054
850	9.33111		850	-9.47184		850	35.4238		850	-4.66422		850	4.4913		850	-27.4882
851	9.59076		851	-9.57561		851	35.4871		851	-4.69334		851	4.44096		851	-27.471
852	9.7464		852	-9.67614		852	35.7131		852	-4.71928		852	4.37495		852	-27.4538
853	9.70359		853	-9.77226		853	35.9418		853	-4.73865		853	4.2994		853	-27.4366
854	9.69049		854	-9.86765		854	36.0716		854	-4.75122		854	4.23573		854	-27.4194
855	9.82712		855	-9.9675		855	36.1072		855	-4.75653		855	4.20345		855	-27.4023
856	9.98686		856	-10.0738		856	36.1065		856	-4.75338		856	4.20177		856	-27.3853
857	10.0577		857	-10.1831		857	36.0595		857	-4.74506		857	4.22667		857	-27.3683
858	9.99934		858	-10.2898		858	35.9601		858	-4.73958		858	4.29667		858	-27.3514
859	9.90476		859	-10.3918		859	35.8847		859	-4.73891		859	4.42977		859	-27.3347
860	9.90241		860	-10.4923		860	35.8524		860	-4.73533		860	4.59694		860	-27.3181
861	9.96311		861	-10.5953		861	35.8186		861	-4.72253		861	4.7291		861	-27.3016
862	10.0787		862	-10.7011		862	35.7503		862	-4.70184		862	4.78039		862	-27.2854
863	10.2528		863	-10.8042		863	35.6583		863	-4.67872		863	4.80731		863	-27.2693
864	10.3866		864	-10.8985		864	35.6241		864	-4.66202		864	4.88821		864	-27.2534
865	10.5134		865	-10.9852		865	35.6876		865	-4.66026		865	4.98331		865	-27.2378
866	10.7178		866	-11.0717		866	35.7668		866	-4.67168		866	5.02718		866	-27.2224
867	10.9041		867	-11.1636		867	35.7984		867	-4.68371		867	4.99197		867	-27.2072
868	10.929		868	-11.2645		868	35.8218		868	-4.68703		868	4.84617		868	-27.1923
869	10.7963		869	-11.3767		869	35.8547		869	-4.68701		869	4.63853		869	-27.1777
870	10.6902		870	-11.4949		870	35.8503		870	-4.69487		870	4.42966		870	-27.1633
871	10.7277		871	-11.6096		871	35.8105		871	-4.7116		871	4.21518		871	-27.1493
872	10.7563		872	-11.7184		872	35.8095		872	-4.72921		872	4.04654		872	-27.1356
873	10.5555		873	-11.8249		873	35.8446		873	-4.74353		873	4.03193		873	-27.1222
874	10.1128		874	-11.9284		874	35.8614		874	-4.75274		874	4.16278		874	-27.1092
875	9.60067		875	-12.023		875	35.8954		875	-4.75302		875	4.32494		875	-27.0965
876	9.22527		876	-12.106		876	35.9841		876	-4.74741		876	4.45994		876	-27.0842
877	9.09479		877	-12.1817		877	36.0971		877	-4.74443		877	4.54411		877	-27.0724
878	9.12897		878	-12.2547		878	36.1883		878	-4.74555		878	4.56619		878	-27.0609
879	9.14893		879	-12.3262		879	36.2013		879	-4.74395		879	4.57285		879	-27.05
880	9.12608		880	-12.395		880	36.114		880	-4.73396		880	4.628		880	-27.0395
881	9.22285		881	-12.4576		881	35.9727		881	-4.71728		881	4.71027		881	-27.0295
882	9.4993		882	-12.5109		882	35.8595		882	-4.69711		882	4.78274		882	-27.02
883	9.81704		883	-12.5521		883	35.8321		883	-4.67489		883	4.83911		883	-27.0111
884	10.0185		884	-12.5808		884	35.8434		884	-4.65536		884	4.84878		884	-27.0028
885	10.1522		885	-12.6053		885	35.7986		885	-4.64492		885	4.79936		885	-26.9951
886	10.3579		886	-12.6389		886	35.7196		886	-4.64455		886	4.72549		886	-26.9881
887	10.5368		887	-12.683		887	35.7083		887	-4.64786		887	4.67128		887	-26.9818
888	10.5253		888	-12.7314		888	35.7558		888	-4.64663		888	4.66708		888	-26.9763
889	10.5045		889	-12.7861		889	35.7825		889	-4.63981		889	4.73418		889	-26.9715
890	10.7075		890	-12.8507		890	35.7864		890	-4.63678		890	4.83602		890	-26.9674
891	10.9245		891	-12.9199		891	35.8087		891	-4.64533		891	4.88526		891	-26.9643
892	10.8953		892	-12.9868		892	35.8623		892	-4.65978		892	4.82431		892	-26.9619
893	10.8122		893	-13.049		893	35.9371		893	-4.67006		893	4.6819		893	-26.9604
894	10.8751		894	-13.111		894	36.0183		894	-4.67471		894	4.55248		894	-26.9598
895	10.8306		895	-13.1794		895	36.0213		895	-4.6766		895	4.50498		895	-26.9602
896	10.451		896	-13.2518		896	35.9156		896	-4.67638		896	4.48486		896	-26.9614
897	9.92098		897	-13.3162		897	35.8434		897	-4.67405		897	4.37217		897	-26.9636
898	9.60518		898	-13.3634		898	35.8352		898	-4.66998		898	4.18896		898	-26.9666
899	9.62854		899	-13.3957		899	35.7976		899	-4.66254		899	4.09027		899	-26.9706
900	9.84729		900	-13.418		900	35.757		900	-4.64757		900	4.17024		900	-26.9755
901	10.2502		901	-13.4239		901	35.7839		901	-4.62557		901	4.39552		901	-26.9812
902	10.8496		902	-13.4026		902	35.8662		902	-4.60177		902	4.65766		902	-26.9878
903	11.3686		903	-13.3617		903	35.9661		903	-4.57909		903	4.8071		903	-26.9953
904	11.5828		904	-13.327		904	36.088		904	-4.56165		904	4.81792		904	-27.0035
905	11.5522		905	-13.3147		905	36.2025		905	-4.55361		905	4.84589		905	-27.0124
906	11.2879		906	-13.3215		906	36.2144		906	-4.5535		906	4.95173		906	-27.022
907	10.8447		907	-13.3379		907	36.0778		907	-4.55949		907	5.00935		907	-27.0323
908	10.531		908	-13.3613		908	35.8884		908	-4.57435		908	4.93871		908	-27.0432
909	10.49		909	-13.3969		909	35.8011		909	-4.59671		909	4.80114		909	-27.0545
910	10.542		910	-13.4449		910	35.8461		910	-4.61919		910	4.7025		910	-27.0663
911	10.5481		911	-13.4974		911	35.9345		911	-4.63943		911	4.67991		911	-27.0785
912	10.5655		912	-13.5482		912	35.9946		912	-4.66031		912	4.67879		912	-27.0911
913	10.6253		913	-13.5957		913	36.0534		913	-4.68144		913	4.65195		913	-27.1038
914	10.6518		914	-13.6408		914	36.1838		914	-4.69802		914	4.59782		914	-27.1168
915	10.6311		915	-13.6844		915	36.3601		915	-4.70498		915	4.54521		915	-27.1299
916	10.5854		916	-13.7276		916	36.4693		916	-4.70111		916	4.53919		916	-27.143
917	10.4032		917	-13.7701		917	36.4507		917	-4.6895		917	4.55216		917	-27.1562
918	10.0107		918	-13.8102		918	36.3156		918	-4.673		918	4.56091		918	-27.1692
919	9.58058		919	-13.8483		919	36.0975		919	-4.65379		919	4.69575		919	-27.1822
920	9.27847		920	-13.8849		920	35.876		920	-4.63461		920	5.01717		920	-27.1949
921	9.06173		921	-13.9159		921	35.7193		921	-4.61775		921	5.29875		921	-27.2075
922	8.94601		922	-13.9381		922	35.6678		922	-4.60382		922	5.29338		922	-27.2197
923	9.1115		923	-13.9519		923	35.7639		923	-4.59236		923	5.0776		923	-27.2317
924	9.5484		924	-13.9563		924	35.9213		924	-4.58298		924	4.96201		924	-27.2433
925	10.021		925	-13.9523		925	35.9772		925	-4.57673		925	5.03598		925	-27.2545
926	10.3252		926	-13.9472		926	35.9192		926	-4.57897		926	5.08583		926	-27.2654
927	10.362		927	-13.9503		927	35.8173		927	-4.59453		927	5.01205		927	-27.2759
928	10.2031		928	-13.9693		928	35.7073		928	-4.61797		928	4.94909		928	-27.286
929	10.0892		929	-14.0076		929	35.6806		929	-4.63932		929	4.98308		929	-27.2957
930	10.167		930	-14.0585		930	35.8245		930	-4.65748		930	5.00846		930	-27.305
931	10.3131		931	-14.1143		931	36.0491		931	-4.67543		931	4.91836		931	-27.3139
932	10.298		932	-14.1761		932	36.1723		932	-4.68893		932	4.79837		932	-27.3225
933	10.0578		933	-14.2488		933	36.132		933	-4.69261		933	4.75766		933	-27.3308
934	9.80285		934	-14.3313		934	36.0331		934	-4.69045		934	4.70789		934	-27.3388
935	9.73884		935	-14.4147		935	35.9986		935	-4.69174		935	4.54497		935	-27.3465
936	9.75985		936	-14.4904		936	36.0563		936	-4.70053		936	4.35725		936	-27.354
937	9.67333		937	-14.5586		937	36.1805		937	-4.713		937	4.27202		937	-27.3613
938	9.46589		938	-14.6256		938	36.3176		938	-4.7218		938	4.2559		938	-27.3685
939	9.23458		939	-14.6939		939	36.3772		939	-4.72023		939	4.24329		939	-27.3756
940	9.05192		940	-14.7627		940	36.2841		940	-4.70576		940	4.32594		940	-27.3827
941	8.95802		941	-14.8321		941	36.0743		941	-4.68448		941	4.55272		941	-27.3897
942	9.02437		942	-14.9026		942	35.916		942	-4.66691		942	4.79056		942	-27.3968
943	9.27319		943	-14.9711		943	35.9256		943	-4.65612		943	4.90309		943	-27.404
944	9.52693		944	-15.0334		944	36.0298		944	-4.6481		944	4.88192		944	-27.4112
945	9.61852		945	-15.0919		945	36.1106		945	-4.64208		945	4.81764		945	-27.4187
946	9.6236		946	-15.1538		946	36.0867		946	-4.64288		946	4.75553		946	-27.4263
947	9.63428		947	-15.2208		947	35.9361		947	-4.65373		947	4.67201		947	-27.4342
948	9.629		948	-15.2927		948	35.8178		948	-4.67299		948	4.63379		948	-27.4423
949	9.59001		949	-15.3712		949	35.9148		949	-4.69701		949	4.72541		949	-27.4506
950	9.53869		950	-15.4521		950	36.1358		950	-4.72285		950	4.82086		950	-27.4593
951	9.39457		951	-15.5282		951	36.2676		951	-4.74821		951	4.74468		951	-27.4683
952	8.99797		952	-15.5962		952	36.2238		952	-4.77025		952	4.59408		952	-27.4775
953	8.44135		953	-15.6528		953	36.0433		953	-4.7861		953	4.59658		953	-27.4872
954	8.01557		954	-15.6887		954	35.8974		954	-4.79301		954	4.72711		954	-27.4971
955	7.82911		955	-15.6941		955	35.9069		955	-4.78877		955	4.77868		955	-27.5074
956	7.78498		956	-15.6705		956	36.0226		956	-4.77451		956	4.67549		956	-27.5181
957	7.79652		957	-15.6293		957	36.2054		957	-4.7551		957	4.49439		957	-27.5291
958	7.9558		958	-15.5822		958	36.4211		958	-4.73756		958	4.3677		958	-27.5405
959	8.34099		959	-15.5326		959	36.519		959	-4.72814		959	4.37673		959	-27.5522
960	8.72961		960	-15.4681		960	36.3997		960	-4.72672		960	4.48932		960	-27.5643
961	8.80674		961	-15.3655		961	36.1936		961	-4.7269		961	4.62141		961	-27.5767
962	8.59555		962	-15.2084		962	36.0983		962	-4.72126		962	4.68917		962	-27.5895
963	8.38407		963	-15.0017		963	36.1343		963	-4.70771		963	4.66101		963	-27.6026
964	8.29447		964	-14.7649		964	36.1741		964	-4.69357		964	4.58322		964	-27.6161
965	8.27687		965	-14.512		965	36.1318		965	-4.68737		965	4.53584		965	-27.6299
966	8.26461		966	-14.2388		966	36.0091		966	-4.68821		966	4.56722		966	-27.644
967	8.21609		967	-13.9293		967	35.8761		967	-4.68972		967	4.66432		967	-27.6584
968	8.12581		968	-13.5823		968	35.8428		968	-4.68836		968	4.77183		968	-27.6732
969	7.98415		969	-13.2232		969	35.9269		969	-4.68495		969	4.84187		969	-27.6883
970	7.86766		970	-12.8775		970	36.0336		970	-4.6831		970	4.83262		970	-27.7037
971	7.92735		971	-12.5491		971	36.0915		971	-4.68495		971	4.76255		971	-27.7193
972	8.1734		972	-12.2333		972	36.0965		972	-4.69093		972	4.74561		972	-27.7353
973	8.48107		973	-11.9281		973	36.1		973	-4.70141		973	4.82884		973	-27.7514
974	8.72091		974	-11.6311		974	36.1706		974	-4.71198		974	4.90632		974	-27.7678
975	8.72465		975	-11.3422		975	36.2342		975	-4.71543		975	4.84406		975	-27.7844
976	8.48175		976	-11.0669		976	36.1525		976	-4.70986		976	4.64205		976	-27.8011
977	8.3286		977	-10.8117		977	35.9688		977	-4.69763		977	4.42094		977	-27.818
978	8.51513		978	-10.5846		978	35.7932		978	-4.6793		978	4.26853		978	-27.8349
979	8.8411		979	-10.3922		979	35.6061		979	-4.65465		979	4.20542		979	-27.8518
980	8.99176		980	-10.2285		980	35.4074		980	-4.62775		980	4.26226		980	-27.8688
981	8.89701		981	-10.0741		981	35.3428		981	-4.60534		981	4.45892		981	-27.8857
982	8.712		982	-9.91498		982	35.4764		982	-4.59067		982	4.72102		982	-27.9025
983	8.61239		983	-9.74932		983	35.6519		983	-4.58032		983	4.88497		983	-27.9192
984	8.62275		984	-9.58041		984	35.7003		984	-4.56936		984	4.87029		984	-27.9356
985	8.65757		985	-9.4153		985	35.6453		985	-4.55871		985	4.78054		985	-27.9518
986	8.651		986	-9.26331		986	35.5945		986	-4.55412		986	4.72769		986	-27.9677
987	8.57749		987	-9.1281		987	35.6009		987	-4.55896		987	4.68479		987	-27.9833
988	8.50161		988	-9.00331		988	35.6636		988	-4.57009		988	4.58341		988	-27.9985
989	8.5984		989	-8.88336		989	35.7493		989	-4.58295		989	4.42454		989	-28.0133
990	8.91305		990	-8.77149		990	35.8669		990	-4.59808		990	4.29086		990	-28.0277
991	9.27795		991	-8.66961		991	36.036		991	-4.61739		991	4.26516		991	-28.0417
992	9.4921		992	-8.57168		992	36.2035		992	-4.63827		992	4.33696		992	-28.0552
993	9.49242		993	-8.47237		993	36.2503		993	-4.65637		993	4.48024		993	-28.0682
994	9.39958		994	-8.37454		994	36.1198		994	-4.67038		994	4.63396		994	-28.0807
995	9.33191		995	-8.28439		995	35.9394		995	-4.67988		995	4.65981		995	-28.0928
996	9.32994		996	-8.20297		996	35.8667		996	-4.68277		996	4.55767		996	-28.1045
997	9.39116		997	-8.1261		997	35.8901		997	-4.68032		997	4.48876		997	-28.1157
998	9.42974		998	-8.05317		998	35.8959		998	-4.67678		998	4.49923		998	-28.1266
999	9.29313		999	-7.99484		999	35.8508		999	-4.67165		999	4.51774		999	-28.137
1000	8.9491		1000	-7.96568		1000	35.8076		1000	-4.66205		1000	4.54151		1000	-28.1471
1001	8.58992		1001	-7.96945		1001	35.7912		1001	-4.64972		1001	4.6279		1001	-28.1569
1002	8.42564		1002	-7.99543		1002	35.7745		1002	-4.63734		1002	4.72585		1002	-28.1664
1003	8.52915		1003	-8.02602		1003	35.7471		1003	-4.62576		1003	4.71301		1003	-28.1757
1004	8.84505		1004	-8.04736		1004	35.727		1004	-4.61802		1004	4.64753		1004	-28.1847
1005	9.21972		1005	-8.05675		1005	35.7134		1005	-4.6173		1005	4.65741		1005	-28.1935
1006	9.38657		1006	-8.06207		1006	35.6816		1006	-4.62248		1006	4.69961		1006	-28.2022
1007	9.18453		1007	-8.07093		1007	35.5985		1007	-4.63122		1007	4.71696		1007	-28.2108
1008	8.81975		1008	-8.08603		1008	35.4962		1008	-4.64215		1008	4.75031		1008	-28.2192
1009	8.5807		1009	-8.1119		1009	35.4554		1009	-4.6555		1009	4.79693		1009	-28.2275
1010	8.53764		1010	-8.1508		1010	35.5073		1010	-4.67549		1010	4.80639		1010	-28.2357
1011	8.6454		1011	-8.19476		1011	35.6202		1011	-4.70318		1011	4.75638		1011	-28.2437
1012	8.8408		1012	-8.23453		1012	35.6792		1012	-4.73008		1012	4.67926		1012	-28.2517
1013	9.0668		1013	-8.26875		1013	35.5643		1013	-4.74708		1013	4.70775		1013	-28.2595
1014	9.29708		1014	-8.30194		1014	35.3601		1014	-4.75318		1014	4.91867		1014	-28.2671
1015	9.44486		1015	-8.33935		1015	35.3079		1015	-4.75292		1015	5.12149		1015	-28.2746
1016	9.4257		1016	-8.38117		1016	35.4873		1016	-4.75103		1016	5.08292		1016	-28.2817
1017	9.29133		1017	-8.42391		1017	35.7756		1017	-4.74999		1017	4.85584		1017	-28.2887
1018	9.07259		1018	-8.4665		1018	36.0497		1018	-4.74933		1018	4.69038		1018	-28.2952
1019	8.7536		1019	-8.51155		1019	36.2122		1019	-4.74503		1019	4.68791		1019	-28.3014
1020	8.4338		1020	-8.56073		1020	36.1778		1020	-4.73175		1020	4.71887		1020	-28.3072
1021	8.30429		1021	-8.61481		1021	35.9754		1021	-4.70896		1021	4.69868		1021	-28.3124
1022	8.47076		1022	-8.68207		1022	35.7402		1022	-4.68332		1022	4.7269		1022	-28.3171
1023	8.84067		1023	-8.77195		1023	35.5901		1023	-4.66342		1023	4.84836		1023	-28.3212
1024	9.29722		1024	-8.87985		1024	35.5536		1024	-4.65543		1024	4.93532		1024	-28.3246
1025	9.79483		1025	-8.99397		1025	35.5786		1025	-4.65945		1025	4.90654		1025	-28.3274
1026	10.1641		1026	-9.1096		1026	35.6315		1026	-4.66744		1026	4.82341		1026	-28.3293
1027	10.1992		1027	-9.22582		1027	35.7394		1027	-4.67191		1027	4.7899		1027	-28.3305
1028	9.99445		1028	-9.34222		1028	35.8968		1028	-4.67421		1028	4.75398		1028	-28.3309
1029	9.82509		1029	-9.46307		1029	36.0231		1029	-4.68007		1029	4.61635		1029	-28.3304
1030	9.75906		1030	-9.59307		1030	36.0722		1030	-4.6905		1030	4.46286		1030	-28.329
1031	9.66772		1031	-9.73195		1031	36.0782		1031	-4.70073		1031	4.38903		1031	-28.3269
1032	9.49382		1032	-9.87712		1032	36.0639		1032	-4.70729		1032	4.36375		1032	-28.3239
1033	9.33377		1033	-10.0276		1033	36.0097		1033	-4.71083		1033	4.37064		1033	-28.3201
1034	9.29695		1034	-10.1839		1034	35.9544		1034	-4.71445		1034	4.45597		1034	-28.3155
1035	9.41223		1035	-10.3434		1035	35.9875		1035	-4.72213		1035	4.60589		1035	-28.3102
1036	9.61658		1036	-10.497		1036	36.0915		1036	-4.73369		1036	4.6755		1036	-28.3042
1037	9.7023		1037	-10.6366		1037	36.1612		1037	-4.74303		1037	4.59587		1037	-28.2976
1038	9.48547		1038	-10.7629		1038	36.1593		1038	-4.74424		1038	4.54308		1038	-28.2904
1039	9.0489		1039	-10.8834		1039	36.1236		1039	-4.73473		1039	4.65697		1039	-28.2828
1040	8.66204		1040	-11.0028		1040	36.0099		1040	-4.71626		1040	4.86333		1040	-28.2748
1041	8.5077		1041	-11.1172		1041	35.753		1041	-4.6963		1041	5.05997		1041	-28.2666
1042	8.62653		1042	-11.2191		1042	35.5099		1042	-4.68144		1042	5.1775		1042	-28.2581
1043	8.96768		1043	-11.3067		1043	35.4585		1043	-4.67172		1043	5.14083		1043	-28.2495
1044	9.33406		1044	-11.3862		1044	35.5277		1044	-4.6641		1044	4.99782		1044	-28.2409
1045	9.45278		1045	-11.4634		1045	35.6089		1045	-4.65497		1045	4.8848		1045	-28.2323
1046	9.26781		1046	-11.5392		1046	35.6386		1046	-4.6413		1046	4.84303		1046	-28.2239
1047	8.99784		1047	-11.6174		1047	35.6351		1047	-4.62651		1047	4.86322		1047	-28.2158
1048	8.84634		1048	-11.7061		1048	35.7339		1048	-4.61925		1048	4.87972		1048	-28.2079
1049	8.81017		1049	-11.8087		1049	35.9236		1049	-4.62201		1049	4.75989		1049	-28.2004
1050	8.77095		1050	-11.9205		1050	36.0273		1050	-4.62984		1050	4.48669		1050	-28.1934
1051	8.72583		1051	-12.0352		1051	35.9927		1051	-4.63917		1051	4.25513		1051	-28.1868
1052	8.74677		1052	-12.1514		1052	35.9353		1052	-4.65111		1052	4.23668		1052	-28.1808
1053	8.80055		1053	-12.2669		1053	35.9241		1053	-4.66685		1053	4.34008		1053	-28.1754
1054	8.86436		1054	-12.3776		1054	35.9453		1054	-4.68256		1054	4.37704		1054	-28.1706
1055	8.93317		1055	-12.4864		1055	35.9657		1055	-4.6921		1055	4.35764		1055	-28.1664
1056	8.95255		1056	-12.6002		1056	35.9782		1056	-4.6928		1056	4.44509		1056	-28.1629
1057	8.9069		1057	-12.7184		1057	36.0166		1057	-4.68708		1057	4.61534		1057	-28.16
1058	8.78792		1058	-12.8321		1058	36.0739		1058	-4.67773		1058	4.65455		1058	-28.1578
1059	8.5549		1059	-12.9269		1059	36.1169		1059	-4.66446		1059	4.54628		1059	-28.1563
1060	8.33386		1060	-12.9842		1060	36.1313		1060	-4.64725		1060	4.48462		1060	-28.1554
1061	8.42146		1061	-12.9986		1061	36.0896		1061	-4.62953		1061	4.52169		1061	-28.1552
1062	8.81648		1062	-12.9858		1062	35.9992		1062	-4.61361		1062	4.55785		1062	-28.1557
1063	9.17704		1063	-12.9629		1063	35.9499		1063	-4.59671		1063	4.57713		1063	-28.1567
1064	9.33169		1064	-12.9357		1064	35.974		1064	-4.57883		1064	4.67597		1064	-28.1584
1065	9.42519		1065	-12.9031		1065	35.9764		1065	-4.56664		1065	4.87776		1065	-28.1607
1066	9.60503		1066	-12.8662		1066	35.9224		1066	-4.56548		1066	5.06975		1066	-28.1636
1067	9.74838		1067	-12.83		1067	35.9179		1067	-4.57676		1067	5.18494		1067	-28.1671
1068	9.63041		1068	-12.8004		1068	35.9884		1068	-4.59936		1068	5.22035		1068	-28.1712
1069	9.37092		1069	-12.7815		1069	36.0389		1069	-4.6277		1069	5.10493		1069	-28.1758
1070	9.28141		1070	-12.7705		1070	36.0926		1070	-4.65428		1070	4.86565		1070	-28.181
1071	9.33649		1071	-12.7601		1071	36.266		1071	-4.67284		1071	4.69235		1071	-28.1867
1072	9.31466		1072	-12.747		1072	36.4928		1072	-4.68344		1072	4.65248		1072	-28.1929
1073	9.23748		1073	-12.733		1073	36.5489		1073	-4.69498		1073	4.64657		1073	-28.1996
1074	9.309		1074	-12.722		1074	36.4057		1074	-4.71286		1074	4.63368		1074	-28.2067
1075	9.59159		1075	-12.7156		1075	36.2589		1075	-4.7333		1075	4.63814		1075	-28.2143
1076	9.92316		1076	-12.7058		1076	36.2138		1076	-4.7501		1076	4.60716		1076	-28.2223
1077	9.99112		1077	-12.6751		1077	36.2178		1077	-4.75968		1077	4.48329		1077	-28.2307
1078	9.64855		1078	-12.6066		1078	36.176		1078	-4.76231		1078	4.36622		1078	-28.2395
1079	9.18491		1079	-12.4997		1079	36.0251		1079	-4.75616		1079	4.4349		1079	-28.2485
1080	8.92324		1080	-12.3715		1080	35.831		1080	-4.73703		1080	4.70551		1080	-28.2578
1081	8.90089		1081	-12.2391		1081	35.7276		1081	-4.70779		1081	4.97969		1081	-28.2673
1082	9.07915		1082	-12.1131		1082	35.7092		1082	-4.67687		1082	5.06312		1082	-28.277
1083	9.35759		1083	-12.0013		1083	35.7158		1083	-4.64941		1083	4.98861		1083	-28.2867
1084	9.59253		1084	-11.8985		1084	35.7475		1084	-4.63129		1084	4.93146		1084	-28.2966
1085	9.82046		1085	-11.7893		1085	35.8221		1085	-4.62984		1085	4.93643		1085	-28.3064
1086	10.1707		1086	-11.6666		1086	35.9592		1086	-4.63996		1086	4.89445		1086	-28.3161
1087	10.5711		1087	-11.5419		1087	36.0632		1087	-4.64704		1087	4.80749		1087	-28.3257
1088	10.715		1088	-11.4408		1088	36.0123		1088	-4.64715		1088	4.82941		1088	-28.3351
1089	10.4545		1089	-11.3832		1089	35.9156		1089	-4.64923		1089	4.97244		1089	-28.3443
1090	10.0486		1090	-11.3641		1090	35.9451		1090	-4.65896		1090	5.056		1090	-28.3531
1091	9.78532		1091	-11.3657		1091	36.0674		1091	-4.67165		1091	4.94106		1091	-28.3615
1092	9.68723		1092	-11.3795		1092	36.1472		1092	-4.67955		1092	4.68821		1092	-28.3695
1093	9.62706		1093	-11.4043		1093	36.1411		1093	-4.67968		1093	4.50515		1093	-28.377
1094	9.5244		1094	-11.4391		1094	36.1325		1094	-4.67705		1094	4.49799		1094	-28.3839
1095	9.4381		1095	-11.4761		1095	36.2073		1095	-4.67992		1095	4.55634		1095	-28.3902
1096	9.42547		1096	-11.5036		1096	36.3216		1096	-4.68834		1096	4.56727		1096	-28.3959
1097	9.41239		1097	-11.5182		1097	36.3798		1097	-4.69383		1097	4.55122		1097	-28.4008
1098	9.30725		1098	-11.5274		1098	36.3384		1098	-4.69167		1098	4.53398		1098	-28.405
1099	9.1251		1099	-11.5366		1099	36.22		1099	-4.68553		1099	4.49849		1099	-28.4085
1100	8.96157		1100	-11.5412		1100	36.0965		1100	-4.68042		1100	4.47048		1100	-28.4112
1101	8.9079		1101	-11.532		1101	36.0231		1101	-4.67717		1101	4.49087		1101	-28.413
1102	9.05427		1102	-11.4943		1102	36.0069		1102	-4.67382		1102	4.55423		1102	-28.4141
1103	9.45176		1103	-11.4123		1103	36.02		1103	-4.66928		1103	4.63441		1103	-28.4143
1104	9.94374		1104	-11.2874		1104	36.0694		1104	-4.66556		1104	4.71774		1104	-28.4137
1105	10.2561		1105	-11.1382		1105	36.1967		1105	-4.666		1105	4.79333		1105	-28.4122
1106	10.3253		1106	-10.9799		1106	36.3159		1106	-4.66961		1106	4.87197		1106	-28.4099
1107	10.2376		1107	-10.8176		1107	36.306		1107	-4.67176		1107	4.9783		1107	-28.4068
1108	9.99971		1108	-10.655		1108	36.2114		1108	-4.67183		1108	5.08409		1108	-28.403
1109	9.65816		1109	-10.4987		1109	36.1466		1109	-4.67361		1109	5.10428		1109	-28.3983
1110	9.34612		1110	-10.3537		1110	36.1443		1110	-4.68173		1110	4.98194		1110	-28.393
1111	9.14469		1111	-10.2185		1111	36.1426		1111	-4.69916		1111	4.75678		1111	-28.387
1112	9.08678		1112	-10.0861		1112	36.1045		1112	-4.72364		1112	4.55927		1112	-28.3804
1113	9.16876		1113	-9.95247		1113	36.0776		1113	-4.7475		1113	4.46648		1113	-28.3731
1114	9.30131		1114	-9.82059		1114	36.1161		1114	-4.76521		1114	4.38916		1114	-28.3654
1115	9.36611		1115	-9.69438		1115	36.1776		1115	-4.77771		1115	4.3059		1115	-28.3571
1116	9.25182		1116	-9.57003		1116	36.1928		1116	-4.78506		1116	4.3359		1116	-28.3485
1117	8.99498		1117	-9.44044		1117	36.2071		1117	-4.78491		1117	4.49186		1117	-28.3396
1118	8.841		1118	-9.30704		1118	36.2786		1118	-4.77703		1118	4.64077		1118	-28.3303
1119	8.83758		1119	-9.17901		1119	36.3622		1119	-4.76275		1119	4.66438		1119	-28.3209
1120	8.78476		1120	-9.06007		1120	36.4008		1120	-4.74401		1120	4.58404		1120	-28.3114
1121	8.69568		1121	-8.94456		1121	36.4146		1121	-4.72148		1121	4.50706		1121	-28.3019
1122	8.77089		1122	-8.82561		1122	36.4466		1122	-4.6926		1122	4.50427		1122	-28.2924
1123	9.00676		1123	-8.70006		1123	36.4762		1123	-4.65819		1123	4.60191		1123	-28.2831
1124	9.24761		1124	-8.56758		1124	36.4388		1124	-4.62854		1124	4.75596		1124	-28.274
1125	9.47321		1125	-8.43039		1125	36.3448		1125	-4.6127		1125	4.86192		1125	-28.2652
1126	9.70362		1126	-8.2956		1126	36.2367		1126	-4.60668		1126	4.88085		1126	-28.2569
1127	9.81471		1127	-8.17118		1127	36.1298		1127	-4.6023		1127	4.83845		1127	-28.249
1128	9.69289		1128	-8.05926		1128	36.0786		1128	-4.60005		1128	4.76245		1128	-28.2418
1129	9.39035		1129	-7.95723		1129	36.1284		1129	-4.60694		1129	4.71603		1129	-28.2352
1130	9.14045		1130	-7.85992		1130	36.2573		1130	-4.62755		1130	4.71332		1130	-28.2293
1131	9.18446		1131	-7.76136		1131	36.4016		1131	-4.65558		1131	4.67172		1131	-28.2242
1132	9.48924		1132	-7.66236		1132	36.4705		1132	-4.67747		1132	4.58299		1132	-28.2201
1133	9.78267		1133	-7.57206		1133	36.4306		1133	-4.68817		1133	4.54346		1133	-28.2168
1134	9.89408		1134	-7.49724		1134	36.3511		1134	-4.69364		1134	4.58874		1134	-28.2145
1135	9.93606		1135	-7.43402		1135	36.3006		1135	-4.69608		1135	4.62728		1135	-28.2133
1136	10.0346		1136	-7.37481		1136	36.3366		1136	-4.68806		1136	4.6245		1136	-28.2131
1137	10.0569		1137	-7.31684		1137	36.4988		1137	-4.66635		1137	4.6605		1137	-28.2139
1138	9.92705		1138	-7.2589		1138	36.6853		1138	-4.64051		1138	4.76435		1138	-28.2158
1139	9.86009		1139	-7.19718		1139	36.7213		1139	-4.62133		1139	4.88569		1139	-28.2188
1140	10.0073		1140	-7.12156		1140	36.584		1140	-4.61268		1140	4.93915		1140	-28.2228
1141	10.2648		1141	-7.02333		1141	36.4283		1141	-4.61409		1141	4.86415		1141	-28.2278
1142	10.5458		1142	-6.9132		1142	36.3863		1142	-4.6233		1142	4.73737		1142	-28.2337
1143	10.9095		1143	-6.81942		1143	36.4141		1143	-4.63591		1143	4.67392		1143	-28.2405
1144	11.3409		1144	-6.76502		1144	36.4214		1144	-4.64711		1144	4.68027		1144	-28.2481
1145	11.7798		1145	-6.75023		1145	36.4181		1145	-4.65419		1145	4.75391		1145	-28.2564
1146	12.2749		1146	-6.75682		1146	36.4819		1146	-4.65604		1146	4.87568		1146	-28.2653
1147	12.7345		1147	-6.76683		1147	36.6532		1147	-4.65463		1147	4.96585		1147	-28.2747
1148	12.9254		1148	-6.77714		1148	36.8142		1148	-4.65407		1148	4.97851		1148	-28.2845
1149	12.8779		1149	-6.79598		1149	36.796		1149	-4.65615		1149	4.95299		1149	-28.2946
1150	12.8174		1150	-6.82724		1150	36.6359		1150	-4.66087		1150	4.92242		1150	-28.3048
1151	12.7598		1151	-6.86546		1151	36.4858		1151	-4.6689		1151	4.83612		1151	-28.3151
1152	12.5213		1152	-6.90333		1152	36.401		1152	-4.68018		1152	4.6391		1152	-28.3252
1153	12.0957		1153	-6.9405		1153	36.3737		1153	-4.69111		1153	4.43842		1153	-28.335
1154	11.7689		1154	-6.986		1154	36.3558		1154	-4.69686		1154	4.36037		1154	-28.3445
1155	11.8025		1155	-7.0474		1155	36.304		1155	-4.6972		1155	4.36169		1155	-28.3534
1156	12.1703		1156	-7.12038		1156	36.3001		1156	-4.69513		1156	4.37752		1156	-28.3617
1157	12.5103		1157	-7.19402		1157	36.3823		1157	-4.69271		1157	4.38432		1157	-28.3693
1158	12.409		1158	-7.25934		1158	36.4252		1158	-4.68965		1158	4.37566		1158	-28.3759
1159	11.9468		1159	-7.31158		1159	36.3845		1159	-4.684		1159	4.37679		1159	-28.3817
1160	11.5731		1160	-7.34965		1160	36.3162		1160	-4.67567		1160	4.3958		1160	-28.3864
1161	11.5613		1161	-7.37335		1161	36.2312		1161	-4.6668		1161	4.4422		1161	-28.3899
1162	11.9138		1162	-7.38709		1162	36.1316		1162	-4.65671		1162	4.58559		1162	-28.3923
1163	12.4239		1163	-7.40362		1163	36.063		1163	-4.64409		1163	4.80843		1163	-28.3935
1164	12.8038		1164	-7.43494		1164	36.0702		1164	-4.63241		1164	4.96207		1164	-28.3934
1165	12.9187		1165	-7.48306		1165	36.1381		1165	-4.62482		1165	4.95407		1165	-28.392
1166	12.8382		1166	-7.54251		1166	36.1672		1166	-4.61928		1166	4.82883		1166	-28.3894
1167	12.6583		1167	-7.61273		1167	36.0852		1167	-4.61362		1167	4.72515		1167	-28.3855
1168	12.4321		1168	-7.70267		1168	35.9557		1168	-4.61056		1168	4.71011		1168	-28.3803
1169	12.1656		1169	-7.81775		1169	35.9069		1169	-4.61591		1169	4.6719		1169	-28.3739
1170	11.711		1170	-7.94955		1170	36.0192		1170	-4.63147		1170	4.50387		1170	-28.3664
1171	10.9578		1171	-8.07376		1171	36.2062		1171	-4.65115		1171	4.33601		1171	-28.3576
1172	10.0638		1172	-8.15113		1172	36.2901		1172	-4.66618		1172	4.36728		1172	-28.3479
1173	9.35905		1173	-8.15409		1173	36.2489		1173	-4.67247		1173	4.55299		1173	-28.3371
1174	9.08477		1174	-8.09687		1174	36.207		1174	-4.67509		1174	4.69255		1174	-28.3254
1175	9.11735		1175	-8.01508		1175	36.2233		1175	-4.68082		1175	4.71798		1175	-28.3129
1176	9.1579		1176	-7.92763		1176	36.2167		1176	-4.68626		1176	4.69324		1176	-28.2995
1177	9.13008		1177	-7.83455		1177	36.1272		1177	-4.6859		1177	4.69419		1177	-28.2856
1178	9.07878		1178	-7.7334		1178	36.0059		1178	-4.68212		1178	4.78211		1178	-28.2711
1179	8.95988		1179	-7.62696		1179	35.8923		1179	-4.67772		1179	4.89481		1179	-28.256
1180	8.80557		1180	-7.51735		1180	35.7809		1180	-4.67124		1180	4.93078		1180	-28.2406
1181	8.79537		1181	-7.40295		1181	35.7228		1181	-4.66253		1181	4.91887		1181	-28.2249
1182	8.97274		1182	-7.28736		1182	35.7777		1182	-4.65319		1182	4.88955		1182	-28.209
1183	9.15604		1183	-7.18027		1183	35.929		1183	-4.64387		1183	4.84376		1183	-28.1929
1184	9.25401		1184	-7.0846		1184	36.1009		1184	-4.63736		1184	4.86197		1184	-28.1768
1185	9.35127		1185	-6.98906		1185	36.2143		1185	-4.63776		1185	4.98678		1185	-28.1608
1186	9.44861		1186	-6.87961		1186	36.2345		1186	-4.64536		1186	5.12315		1186	-28.1448
1187	9.46449		1187	-6.7571		1187	36.1676		1187	-4.65643		1187	5.16367		1187	-28.129
1188	9.42679		1188	-6.63492		1188	36.0798		1188	-4.66877		1188	5.11087		1188	-28.1135
1189	9.42849		1189	-6.5238		1189	36.0798		1189	-4.68503		1189	5.00754		1189	-28.0982
1190	9.47512		1190	-6.4238		1190	36.171		1190	-4.7062		1190	4.83215		1190	-28.0833
1191	9.54536		1191	-6.32803		1191	36.2256		1191	-4.72548		1191	4.59623		1191	-28.0687
1192	9.66991		1192	-6.23296		1192	36.1987		1192	-4.73431		1192	4.41616		1192	-28.0546
1193	9.83112		1193	-6.14222		1193	36.1948		1193	-4.73302		1193	4.39993		1193	-28.0409
1194	9.9174		1194	-6.06357		1194	36.2904		1194	-4.73012		1194	4.52821		1194	-28.0276
1195	9.93814		1195	-6.00115		1195	36.4357		1195	-4.73049		1195	4.64332		1195	-28.0148
1196	10.0894		1196	-5.94747		1196	36.5379		1196	-4.72963		1196	4.66838		1196	-28.0024
1197	10.3088		1197	-5.88933		1197	36.548		1197	-4.72163		1197	4.70454		1197	-27.9905
1198	10.1771		1198	-5.82168		1198	36.4882		1198	-4.70646		1198	4.80749		1198	-27.9791
1199	9.55548		1199	-5.74997		1199	36.4554		1199	-4.68797		1199	4.88151		1199	-27.968
1200	8.8687		1200	-5.68038		1200	36.4931		1200	-4.66838		1200	4.8453		1200	-27.9572
1201	8.56524		1201	-5.6112		1201	36.5431		1201	-4.65031		1201	4.80364		1201	-27.9469
1202	8.72679		1202	-5.53583		1202	36.5456		1202	-4.6382		1202	4.88629		1202	-27.9368
1203	9.15246		1203	-5.45225		1203	36.5125		1203	-4.63156		1203	4.99925		1203	-27.927
1204	9.53059		1204	-5.36654		1204	36.4907		1204	-4.6263		1204	4.99438		1204	-27.9174
1205	9.71218		1205	-5.29128		1205	36.4509		1205	-4.62217		1205	4.88819		1205	-27.9079
1206	9.79016		1206	-5.243		1206	36.3536		1206	-4.62155		1206	4.78173		1206	-27.8985
1207	9.86843		1207	-5.23577		1207	36.2648		1207	-4.62539		1207	4.7491		1207	-27.8892
1208	10.0321		1208	-5.27507		1208	36.3065		1208	-4.63226		1208	4.76156		1208	-27.8798
1209	10.3781		1209	-5.35765		1209	36.4997		1209	-4.64018		1209	4.76738		1209	-27.8703
1210	10.8373		1210	-5.4713		1210	36.707		1210	-4.6496		1210	4.77974		1210	-27.8607
1211	11.207		1211	-5.5987		1211	36.796		1211	-4.66186		1211	4.7946		1211	-27.8509
1212	11.3241		1212	-5.72665		1212	36.7472		1212	-4.67626		1212	4.78031		1212	-27.8408
1213	11.2103		1213	-5.84961		1213	36.6388		1213	-4.69246		1213	4.76773		1213	-27.8305
1214	11.1044		1214	-5.97191		1214	36.5753		1214	-4.71244		1214	4.80568		1214	-27.8198
1215	11.1829		1215	-6.10421		1215	36.5938		1215	-4.73416		1215	4.82163		1215	-27.8087
1216	11.39		1216	-6.24808		1216	36.6842		1216	-4.7495		1216	4.74312		1216	-27.7972
1217	11.5625		1217	-6.39412		1217	36.7878		1217	-4.7527		1217	4.61994		1217	-27.7852
1218	11.5304		1218	-6.5306		1218	36.813		1218	-4.74445		1218	4.49461		1218	-27.7728
1219	11.2105		1219	-6.64244		1219	36.7147		1219	-4.72719		1219	4.42603		1219	-27.7598
1220	10.6916		1220	-6.71152		1220	36.4883		1220	-4.70316		1220	4.51191		1220	-27.7463
1221	10.1913		1221	-6.7298		1221	36.1972		1221	-4.67635		1221	4.70996		1221	-27.7323
1222	9.94372		1222	-6.70503		1222	36.0314		1222	-4.65028		1222	4.8701		1222	-27.7177
1223	10.0118		1223	-6.64443		1223	36.1071		1223	-4.62808		1223	4.93431		1223	-27.7025
1224	10.2259		1224	-6.54881		1224	36.2872		1224	-4.61349		1224	4.94151		1224	-27.6869
1225	10.4641		1225	-6.42752		1225	36.3605		1225	-4.60539		1225	4.92318		1225	-27.6707
1226	10.7445		1226	-6.29715		1226	36.2901		1226	-4.5994		1226	4.90048		1226	-27.654
1227	10.9402		1227	-6.16612		1227	36.1797		1227	-4.59545		1227	4.90468		1227	-27.6369
1228	10.8594		1228	-6.03717		1228	36.1066		1228	-4.5996		1228	4.93466		1228	-27.6193
1229	10.625		1229	-5.92146		1229	36.1293		1229	-4.61549		1229	4.94099		1229	-27.6012
1230	10.5537		1230	-5.83201		1230	36.2812		1230	-4.63659		1230	4.86785		1230	-27.5828
1231	10.6962		1231	-5.76257		1231	36.4794		1231	-4.65233		1231	4.7091		1231	-27.564
1232	10.8098		1232	-5.69055		1232	36.6121		1232	-4.65766		1232	4.5455		1232	-27.5449
1233	10.7641		1233	-5.60205		1233	36.6852		1233	-4.6576		1233	4.49388		1233	-27.5256
1234	10.6695		1234	-5.50161		1234	36.7707		1234	-4.66138		1234	4.58319		1234	-27.506
1235	10.6078		1235	-5.40469		1235	36.864		1235	-4.67174		1235	4.69258		1235	-27.4863
1236	10.5578		1236	-5.332		1236	36.8815		1236	-4.68388		1236	4.68719		1236	-27.4665
1237	10.4688		1237	-5.3014		1237	36.758		1237	-4.6914		1237	4.57756		1237	-27.4467
1238	10.2765		1238	-5.30845		1238	36.518		1238	-4.69012		1238	4.49973		1238	-27.4269
1239	9.96901		1239	-5.32811		1239	36.2691		1239	-4.6776		1239	4.60346		1239	-27.4071
1240	9.67535		1240	-5.342		1240	36.1082		1240	-4.65393		1240	4.86896		1240	-27.3875
1241	9.56775		1241	-5.34741		1241	36.0459		1241	-4.62454		1241	5.0727		1241	-27.368
1242	9.72562		1242	-5.34246		1242	36.0537		1242	-4.59858		1242	5.055		1242	-27.3488
1243	10.0503		1243	-5.31432		1243	36.1231		1243	-4.58354		1243	4.89516		1243	-27.3299
1244	10.2507		1244	-5.24861		1244	36.1874		1244	-4.58124		1244	4.74368		1244	-27.3113
1245	10.2029		1245	-5.14903		1245	36.1923		1245	-4.5865		1245	4.67299		1245	-27.2931
1246	10.0716		1246	-5.03669		1246	36.2108		1246	-4.593		1246	4.71991		1246	-27.2753
1247	9.95938		1247	-4.92794		1247	36.2573		1247	-4.60023		1247	4.83481		1247	-27.2581
1248	9.78669		1248	-4.82411		1248	36.2148		1248	-4.61059		1248	4.81822		1248	-27.2413
1249	9.47589		1249	-4.72513		1249	36.0834		1249	-4.62408		1249	4.62115		1249	-27.2251
1250	9.09463		1250	-4.63881		1250	36.03		1250	-4.63821		1250	4.54035		1250	-27.2095
1251	8.80365		1251	-4.56888		1251	36.1195		1251	-4.6506		1251	4.74016		1251	-27.1944
1252	8.66373		1252	-4.50967		1252	36.213		1252	-4.66095		1252	4.97855		1252	-27.18
1253	8.62344		1253	-4.4565		1253	36.1928		1253	-4.67004		1253	5.02804		1253	-27.1661
1254	8.61841		1254	-4.40764		1254	36.1244		1254	-4.6778		1254	4.94445		1254	-27.1529
1255	8.60007		1255	-4.36204		1255	36.0998		1255	-4.68362		1255	4.87771		1255	-27.1402
1256	8.55835		1256	-4.32207		1256	36.0753		1256	-4.6888		1256	4.86741		1256	-27.1281
1257	8.5057		1257	-4.29259		1257	35.9767		1257	-4.6945		1257	4.86202		1257	-27.1165
1258	8.42266		1258	-4.27925		1258	35.8267		1258	-4.69756		1258	4.81897		1258	-27.1055
1259	8.29471		1259	-4.28979		1259	35.6845		1259	-4.69372		1259	4.76923		1259	-27.0949
1260	8.20765		1260	-4.32565		1260	35.605		1260	-4.68511		1260	4.75208		1260	-27.0846
1261	8.24899		1261	-4.37407		1261	35.6003		1261	-4.67913		1261	4.76535		1261	-27.0748
1262	8.42296		1262	-4.41934		1262	35.643		1262	-4.67944		1262	4.8124		1262	-27.0652
1263	8.71055		1263	-4.45393		1263	35.7684		1263	-4.68254		1263	4.87047		1263	-27.0558
1264	9.01174		1264	-4.47478		1264	35.9764		1264	-4.68299		1264	4.91213		1264	-27.0465
1265	9.21016		1265	-4.48133		1265	36.148		1265	-4.67864		1265	4.92984		1265	-27.0374
1266	9.30202		1266	-4.47812		1266	36.2047		1266	-4.67246		1266	4.9052		1266	-27.0282
1267	9.29466		1267	-4.47059		1267	36.1848		1267	-4.66862		1267	4.84666		1267	-27.0189
1268	9.1933		1268	-4.46562		1268	36.1228		1268	-4.66849		1268	4.79565		1268	-27.0095
1269	9.10151		1269	-4.47137		1269	36.0487		1269	-4.67328		1269	4.81034		1269	-26.9999
1270	9.04787		1270	-4.48472		1270	36.037		1270	-4.68421		1270	4.87689		1270	-26.9901
1271	8.91692		1271	-4.49466		1271	36.123		1271	-4.69839		1271	4.89646		1271	-26.9799
1272	8.71319		1272	-4.49932		1272	36.277		1272	-4.7114		1272	4.87403		1272	-26.9694
1273	8.56022		1273	-4.50847		1273	36.4118		1273	-4.72186		1273	4.88087		1273	-26.9585
1274	8.51429		1274	-4.53218		1274	36.4581		1274	-4.72804		1274	4.8628		1274	-26.9471
1275	8.59107		1275	-4.57347		1275	36.426		1275	-4.72681		1275	4.76401		1275	-26.9353
1276	8.79155		1276	-4.62812		1276	36.3484		1276	-4.71781		1276	4.6712		1276	-26.923
1277	9.01196		1277	-4.6868		1277	36.2818		1277	-4.70285		1277	4.63238		1277	-26.9103
1278	9.20245		1278	-4.7434		1278	36.2544		1278	-4.6845		1278	4.60245		1278	-26.8972
1279	9.51062		1279	-4.79668		1279	36.2655		1279	-4.66547		1279	4.60615		1279	-26.8836
1280	9.94469		1280	-4.84345		1280	36.2759		1280	-4.64715		1280	4.67674		1280	-26.8696
1281	10.2544		1281	-4.88023		1281	36.2216		1281	-4.62991		1281	4.76424		1281	-26.8553
1282	10.2967		1282	-4.90936		1282	36.1798		1282	-4.61284		1282	4.85321		1282	-26.8406
1283	10.0939		1283	-4.93772		1283	36.2773		1283	-4.59473		1283	4.9628		1283	-26.8257
1284	9.73648		1284	-4.96865		1284	36.4228		1284	-4.57849		1284	5.03275		1284	-26.8105
1285	9.4651		1285	-5.00017		1285	36.4531		1285	-4.56748		1285	5.01646		1285	-26.7953
1286	9.42399		1286	-5.03297		1286	36.4257		1286	-4.55977		1286	4.968		1286	-26.7799
1287	9.44592		1287	-5.07215		1287	36.4291		1287	-4.55448		1287	4.93166		1287	-26.7645
1288	9.36639		1288	-5.12189		1288	36.4125		1288	-4.55639		1288	4.90947		1288	-26.7492
1289	9.21269		1289	-5.18064		1289	36.3689		1289	-4.56728		1289	4.89006		1289	-26.7339
1290	9.04019		1290	-5.24203		1290	36.3475		1290	-4.58142		1290	4.84996		1290	-26.7189
1291	8.85728		1291	-5.30207		1291	36.346		1291	-4.59173		1291	4.80334		1291	-26.7041
1292	8.7083		1292	-5.36127		1292	36.3943		1292	-4.59501		1292	4.78309		1292	-26.6896
1293	8.71362		1293	-5.42136		1293	36.5191		1293	-4.59517		1293	4.77702		1293	-26.6754
1294	8.95119		1294	-5.48267		1294	36.6444		1294	-4.60073		1294	4.76564		1294	-26.6616
1295	9.25658		1295	-5.54421		1295	36.7025		1295	-4.61515		1295	4.72624		1295	-26.6482
1296	9.38458		1296	-5.60582		1296	36.672		1296	-4.63117		1296	4.65269		1296	-26.6353
1297	9.36505		1297	-5.66791		1297	36.5768		1297	-4.63892		1297	4.60359		1297	-26.6229
1298	9.34194		1298	-5.72748		1298	36.5364		1298	-4.63613		1298	4.66352		1298	-26.6109
1299	9.24597		1299	-5.77982		1299	36.6001		1299	-4.62812		1299	4.85229		1299	-26.5995
1300	8.98335		1300	-5.82413		1300	36.6134		1300	-4.62249		1300	5.0597		1300	-26.5885
1301	8.7059		1301	-5.863		1301	36.4495		1301	-4.62089		1301	5.12993		1301	-26.578
1302	8.63105		1302	-5.899		1302	36.2235		1302	-4.61641		1302	5.07444		1302	-26.5679
1303	8.70129		1303	-5.9335		1303	36.1371		1303	-4.60376		1303	5.03556		1303	-26.5581
1304	8.75004		1304	-5.96645		1304	36.1973		1304	-4.5871		1304	5.02268		1304	-26.5487
1305	8.85093		1305	-5.99735		1305	36.2773		1305	-4.5759		1305	4.96825		1305	-26.5396
1306	9.10031		1306	-6.02587		1306	36.3077		1306	-4.57635		1306	4.875		1306	-26.5307
1307	9.31345		1307	-6.05089		1307	36.2853		1307	-4.58722		1307	4.76857		1307	-26.522
1308	9.25738		1308	-6.07556		1308	36.2747		1308	-4.6046		1308	4.67059		1308	-26.5133
1309	9.03304		1309	-6.10842		1309	36.3295		1309	-4.62752		1309	4.61107		1309	-26.5045
1310	8.91321		1310	-6.14959		1310	36.4092		1310	-4.65472		1310	4.58021		1310	-26.4957
1311	8.90606		1311	-6.18924		1311	36.4698		1311	-4.68149		1311	4.54418		1311	-26.4867
1312	8.81051		1312	-6.22388		1312	36.5225		1312	-4.70485		1312	4.50656		1312	-26.4773
1313	8.57921		1313	-6.25901		1313	36.5656		1313	-4.72597		1313	4.49284		1313	-26.4676
1314	8.37987		1314	-6.29863		1314	36.5296		1314	-4.74524		1314	4.5295		1314	-26.4573
1315	8.33996		1315	-6.34343		1315	36.4055		1315	-4.75937		1315	4.59505		1315	-26.4465
1316	8.4184		1316	-6.39697		1316	36.3414		1316	-4.76373		1316	4.64714		1316	-26.4349
1317	8.55353		1317	-6.47008		1317	36.4048		1317	-4.75771		1317	4.6161		1317	-26.4226
1318	8.70537		1318	-6.57277		1318	36.4318		1318	-4.74683		1318	4.47511		1318	-26.4094
1319	8.85951		1319	-6.70093		1319	36.3277		1319	-4.73584		1319	4.41296		1319	-26.3953
1320	9.006		1320	-6.84145		1320	36.2385		1320	-4.72362		1320	4.57439		1320	-26.3802
1321	8.99076		1321	-6.98478		1321	36.2644		1321	-4.70805		1321	4.82239		1321	-26.3639
1322	8.71776		1322	-7.1269		1322	36.3189		1322	-4.68941		1322	4.96959		1322	-26.3466
1323	8.40112		1323	-7.26527		1323	36.3424		1323	-4.66923		1323	4.99295		1323	-26.3282
1324	8.29236		1324	-7.39866		1324	36.3487		1324	-4.65142		1324	4.98864		1324	-26.3086
1325	8.44742		1325	-7.52837		1325	36.3413		1325	-4.63992		1325	5.03991		1325	-26.2878
1326	8.76418		1326	-7.65874		1326	36.3217		1326	-4.63393		1326	5.09163		1326	-26.2659
1327	8.98107		1327	-7.79302		1327	36.2622		1327	-4.63296		1327	4.99647		1327	-26.2429
1328	8.85841		1328	-7.93006		1328	36.1633		1328	-4.63961		1328	4.81952		1328	-26.2188
1329	8.48389		1329	-8.07074		1329	36.1097		1329	-4.65253		1329	4.76903		1329	-26.1937
1330	8.19722		1330	-8.21635		1330	36.1854		1330	-4.66476		1330	4.8205		1330	-26.1676
1331	8.16719		1331	-8.36453		1331	36.365		1331	-4.66967		1331	4.83788		1331	-26.1408
1332	8.27151		1332	-8.51553		1332	36.5633		1332	-4.66726		1332	4.77979		1332	-26.1132
1333	8.41254		1333	-8.67104		1333	36.7408		1333	-4.66389		1333	4.68342		1333	-26.085
1334	8.58265		1334	-8.82856		1334	36.8619		1334	-4.66583		1334	4.64582		1334	-26.0563
1335	8.69956		1335	-8.98456		1335	36.8969		1335	-4.67437		1335	4.6516		1335	-26.0273
1336	8.64663		1336	-9.13743		1336	36.8456		1336	-4.6859		1336	4.64986		1336	-25.9981
1337	8.39699		1337	-9.28715		1337	36.7034		1337	-4.69517		1337	4.70932		1337	-25.9689
1338	8.13181		1338	-9.43382		1338	36.5043		1338	-4.69542		1338	4.76307		1338	-25.9398
1339	8.10582		1339	-9.57822		1339	36.3302		1339	-4.68313		1339	4.67959		1339	-25.9109
1340	8.24692		1340	-9.7212		1340	36.2621		1340	-4.66392		1340	4.59041		1340	-25.8825
1341	8.27174		1341	-9.85863		1341	36.3364		1341	-4.64524		1341	4.67595		1341	-25.8546
1342	8.25497		1342	-9.98454		1342	36.446		1342	-4.62983		1342	4.91427		1342	-25.8274
1343	8.49187		1343	-10.0967		1343	36.4278		1343	-4.61925		1343	5.21675		1343	-25.8011
1344	8.94326		1344	-10.1963		1344	36.2762		1344	-4.61644		1344	5.42978		1344	-25.7756
1345	9.34696		1345	-10.2887		1345	36.1355		1345	-4.62148		1345	5.44738		1345	-25.7512
1346	9.59178		1346	-10.3843		1346	36.1023		1346	-4.629		1346	5.40586		1346	-25.7279
1347	9.7293		1347	-10.4883		1347	36.1515		1347	-4.63312		1347	5.3488		1347	-25.7059
1348	9.79646		1348	-10.5996		1348	36.2096		1348	-4.63306		1348	5.10328		1348	-25.685
1349	9.75986		1349	-10.7239		1349	36.2114		1349	-4.63344		1349	4.71105		1349	-25.6654
1350	9.6592		1350	-10.8655		1350	36.2166		1350	-4.64031		1350	4.44038		1350	-25.6471
1351	9.70135		1351	-11.0147		1351	36.3318		1351	-4.65521		1351	4.44102		1351	-25.6302
1352	9.94711		1352	-11.1603		1352	36.4689		1352	-4.67351		1352	4.72113		1352	-25.6145
1353	10.1213		1353	-11.2994		1353	36.4899		1353	-4.69016		1353	5.17724		1353	-25.6001
1354	10.0133		1354	-11.4365		1354	36.4446		1354	-4.70311		1354	5.54168		1354	-25.5869
1355	9.73215		1355	-11.5748		1355	36.4471		1355	-4.71111		1355	5.61406		1355	-25.575
1356	9.42755		1356	-11.7104		1356	36.4611		1356	-4.71423		1356	5.41561		1356	-25.5642
1357	9.12889		1357	-11.8414		1357	36.3728		1357	-4.71452		1357	5.07002		1357	-25.5544
1358	8.90453		1358	-11.9705		1358	36.2373		1358	-4.71333		1358	4.76248		1358	-25.5458
1359	8.85837		1359	-12.0997		1359	36.178		1359	-4.70845		1359	4.63663		1359	-25.5381
1360	8.9219		1360	-12.2279		1360	36.1845		1360	-4.69535		1360	4.6893		1360	-25.5313
1361	8.94209		1361	-12.3523		1361	36.2187		1361	-4.67312		1361	4.8146		1361	-25.5253
1362	8.92454		1362	-12.4688		1362	36.2575		1362	-4.64521		1362	4.92954		1362	-25.5201
1363	8.939		1363	-12.575		1363	36.2542		1363	-4.61646		1363	5.00372		1363	-25.5156
1364	8.98324		1364	-12.6711		1364	36.2303		1364	-4.59391		1364	5.02337		1364	-25.5118
1365	9.05646		1365	-12.7605		1365	36.2667		1365	-4.58195		1365	5.01346		1365	-25.5085
1366	9.15775		1366	-12.8474		1366	36.353		1366	-4.57685		1366	4.98494		1366	-25.5059
1367	9.2773		1367	-12.9341		1367	36.3839		1367	-4.57593		1367	4.91289		1367	-25.5037
1368	9.43283		1368	-13.0262		1368	36.3512		1368	-4.5833		1368	4.83588		1368	-25.5021
1369	9.57698		1369	-13.1291		1369	36.3449		1369	-4.59852		1369	4.83238		1369	-25.5009
1370	9.52624		1370	-13.2388		1370	36.3723		1370	-4.61489		1370	4.88106		1370	-25.5002
1371	9.20871		1371	-13.3458		1371	36.4		1371	-4.62829		1371	4.88037		1371	-25.4999
1372	8.88251		1372	-13.447		1372	36.4404		1372	-4.63755		1372	4.75168		1372	-25.5
1373	8.8297		1373	-13.5444		1373	36.4646		1373	-4.64288		1373	4.53865		1373	-25.5006
1374	9.06711		1374	-13.6409		1374	36.41		1374	-4.6456		1374	4.38841		1374	-25.5016
1375	9.47323		1375	-13.7414		1375	36.3111		1375	-4.64757		1375	4.3747		1375	-25.503
1376	9.81628		1376	-13.8498		1376	36.2852		1376	-4.65107		1376	4.45921		1376	-25.5049
1377	9.86985		1377	-13.9648		1377	36.357		1377	-4.6557		1377	4.55328		1377	-25.5072
1378	9.69321		1378	-14.082		1378	36.4341		1378	-4.65965		1378	4.55693		1378	-25.51
1379	9.49627		1379	-14.1982		1379	36.4278		1379	-4.66285		1379	4.45746		1379	-25.5132
1380	9.39515		1380	-14.3125		1380	36.3183		1380	-4.66317		1380	4.36344		1380	-25.5169
1381	9.38034		1381	-14.4245		1381	36.1593		1381	-4.65802		1381	4.35486		1381	-25.521
1382	9.3596		1382	-14.5314		1382	36.0417		1382	-4.65014		1382	4.43977		1382	-25.5256
1383	9.30393		1383	-14.6291		1383	36.0371		1383	-4.64512		1383	4.59225		1383	-25.5307
1384	9.2415		1384	-14.7146		1384	36.1557		1384	-4.64476		1384	4.72726		1384	-25.5362
1385	9.20494		1385	-14.7898		1385	36.3424		1385	-4.64822		1385	4.80355		1385	-25.5422
1386	9.2437		1386	-14.8631		1386	36.5122		1386	-4.65438		1386	4.86191		1386	-25.5487
1387	9.33808		1387	-14.9418		1387	36.6039		1387	-4.66151		1387	4.91129		1387	-25.5556
1388	9.34687		1388	-15.0253		1388	36.6012		1388	-4.6689		1388	4.93234		1388	-25.5629
1389	9.17232		1389	-15.1111		1389	36.5705		1389	-4.67716		1389	4.90328		1389	-25.5707
1390	8.91136		1390	-15.1979		1390	36.5821		1390	-4.68594		1390	4.76669		1390	-25.5788
1391	8.70859		1391	-15.2831		1391	36.5785		1391	-4.69377		1391	4.48625		1391	-25.5873
1392	8.62557		1392	-15.3641		1392	36.474		1392	-4.70229		1392	4.19359		1392	-25.5961
1393	8.67633		1393	-15.4422		1393	36.2995		1393	-4.71373		1393	4.13536		1393	-25.6052
1394	8.86832		1394	-15.5222		1394	36.1751		1394	-4.72498		1394	4.30086		1394	-25.6146
1395	9.10053		1395	-15.6076		1395	36.1885		1395	-4.73299		1395	4.43707		1395	-25.6243
1396	9.15222		1396	-15.698		1396	36.3299		1396	-4.73968		1396	4.48092		1396	-25.6341
1397	8.91648		1397	-15.7942		1397	36.5177		1397	-4.74689		1397	4.54462		1397	-25.6442
1398	8.55724		1398	-15.8985		1398	36.6603		1398	-4.75224		1398	4.64809		1398	-25.6544
1399	8.36456		1399	-16.0098		1399	36.6919		1399	-4.75037		1399	4.76039		1399	-25.6647
1400	8.42218		1400	-16.1218		1400	36.6005		1400	-4.73778		1400	4.87136		1400	-25.6751
1401	8.64899		1401	-16.226		1401	36.4747		1401	-4.71795		1401	4.94515		1401	-25.6856
1402	9.02888		1402	-16.3173		1402	36.413		1402	-4.69957		1402	4.95336		1402	-25.6961
1403	9.58808		1403	-16.3911		1403	36.4336		1403	-4.68888		1403	4.92634		1403	-25.7065
1404	10.2791		1404	-16.4295		1404	36.5272		1404	-4.68581		1404	4.91113		1404	-25.717
1405	10.9299		1405	-16.4151		1405	36.6419		1405	-4.68368		1405	4.91157		1405	-25.7274
1406	11.2889		1406	-16.3564		1406	36.6694		1406	-4.67691		1406	4.88211		1406	-25.7377
1407	11.1987		1407	-16.2804		1407	36.5881		1407	-4.66888		1407	4.79206		1407	-25.7478
1408	10.8411		1408	-16.2072		1408	36.5174		1408	-4.664		1408	4.68733		1408	-25.7579
1409	10.5561		1409	-16.1464		1409	36.5052		1409	-4.66248		1409	4.69487		1409	-25.7678
1410	10.4332		1410	-16.1001		1410	36.4652		1410	-4.66628		1410	4.8408		1410	-25.7775
1411	10.3455		1411	-16.0623		1411	36.3946		1411	-4.67892		1411	4.95291		1411	-25.787
1412	10.2357		1412	-16.027		1412	36.3945		1412	-4.70066		1412	4.86352		1412	-25.7964
1413	10.1979		1413	-15.9968		1413	36.513		1413	-4.72695		1413	4.6413		1413	-25.8055
1414	10.3174		1414	-15.979		1414	36.7058		1414	-4.74941		1414	4.49391		1414	-25.8143
1415	10.5129		1415	-15.9748		1415	36.8567		1415	-4.76097		1415	4.47658		1415	-25.8229
1416	10.657		1416	-15.9767		1416	36.8683		1416	-4.76281		1416	4.50695		1416	-25.8313
1417	10.6619		1417	-15.9781		1417	36.7354		1417	-4.75973		1417	4.54831		1417	-25.8394
1418	10.4902		1418	-15.9784		1418	36.5361		1418	-4.7493		1418	4.55065		1418	-25.8472
1419	10.2301		1419	-15.9766		1419	36.3798		1419	-4.72574		1419	4.46806		1419	-25.8547
1420	10.0934		1420	-15.9697		1420	36.2978		1420	-4.69254		1420	4.40816		1420	-25.8619
1421	10.2149		1421	-15.9543		1421	36.2699		1421	-4.66252		1421	4.46834		1421	-25.8688
1422	10.3183		1422	-15.9266		1422	36.2934		1422	-4.6445		1422	4.60937		1422	-25.8754
1423	10.067		1423	-15.8846		1423	36.325		1423	-4.63841		1423	4.78506		1423	-25.8816
1424	9.65716		1424	-15.8291		1424	36.3212		1424	-4.64306		1424	4.97056		1424	-25.8875
1425	9.44016		1425	-15.7635		1425	36.2796		1425	-4.65716		1425	5.07673		1425	-25.8931
1426	9.43184		1426	-15.6982		1426	36.1843		1426	-4.67454		1426	5.0632		1426	-25.8983
1427	9.48919		1427	-15.6491		1427	36.0557		1427	-4.68861		1427	5.03904		1427	-25.9032
1428	9.5493		1428	-15.6159		1428	35.9479		1428	-4.69744		1428	5.04593		1428	-25.9077
1429	9.64573		1429	-15.5742		1429	35.9196		1429	-4.70282		1429	5.00847		1429	-25.912
1430	9.74732		1430	-15.5075		1430	36.0302		1430	-4.70995		1430	4.91357		1430	-25.9158
1431	9.66006		1431	-15.4251		1431	36.2604		1431	-4.72292		1431	4.76027		1431	-25.9194
1432	9.40121		1432	-15.3394		1432	36.4751		1432	-4.74046		1432	4.53028		1432	-25.9226
1433	9.2892		1433	-15.2508		1433	36.5466		1433	-4.76038		1433	4.33316		1433	-25.9255
1434	9.4279		1434	-15.1587		1434	36.4956		1434	-4.77872		1434	4.30534		1434	-25.9282
1435	9.60965		1435	-15.0679		1435	36.4447		1435	-4.78854		1435	4.38383		1435	-25.9305
1436	9.69423		1436	-14.9827		1436	36.4983		1436	-4.78837		1436	4.44183		1436	-25.9325
1437	9.74723		1437	-14.9047		1437	36.5828		1437	-4.78409		1437	4.5037		1437	-25.9344
1438	9.89864		1438	-14.8322		1438	36.5255		1438	-4.78038		1438	4.61402		1438	-25.9359
1439	10.1263		1439	-14.7626		1439	36.3213		1439	-4.77459		1439	4.70567		1439	-25.9373
1440	10.1969		1440	-14.6956		1440	36.1317		1440	-4.76173		1440	4.73245		1440	-25.9385
1441	10.0628		1441	-14.6293		1441	36.0902		1441	-4.7442		1441	4.80052		1441	-25.9395
1442	10.0085		1442	-14.5554		1442	36.1599		1442	-4.72688		1442	4.99416		1442	-25.9404
1443	10.1022		1443	-14.4584		1443	36.2479		1443	-4.70913		1443	5.2117		1443	-25.9412
1444	10.0829		1444	-14.314		1444	36.3378		1444	-4.69296		1444	5.34951		1444	-25.9419
1445	9.88466		1445	-14.1089		1445	36.3568		1445	-4.68463		1445	5.41277		1445	-25.9425
1446	9.72217		1446	-13.8633		1446	36.2146		1446	-4.68228		1446	5.36731		1446	-25.9432
1447	9.73261		1447	-13.6134		1447	36.0037		1447	-4.67905		1447	5.23354		1447	-25.9439
1448	9.85154		1448	-13.3807		1448	35.8693		1448	-4.67714		1448	5.14736		1448	-25.9446
1449	9.95307		1449	-13.1717		1449	35.8421		1449	-4.68459		1449	5.13454		1449	-25.9455
1450	9.91887		1450	-12.9864		1450	35.9226		1450	-4.70362		1450	5.10269		1450	-25.9465
1451	9.72161		1451	-12.8171		1451	36.1312		1451	-4.72625		1451	4.97033		1451	-25.9477
1452	9.55923		1452	-12.654		1452	36.3913		1452	-4.74073		1452	4.76178		1452	-25.9491
1453	9.62486		1453	-12.4937		1453	36.5545		1453	-4.74289		1453	4.62378		1453	-25.9507
1454	9.83633		1454	-12.336		1454	36.5731		1454	-4.73745		1454	4.64893		1454	-25.9527
1455	9.97568		1455	-12.1797		1455	36.5169		1455	-4.73107		1455	4.70585		1455	-25.955
1456	9.98539		1456	-12.0226		1456	36.4714		1456	-4.72705		1456	4.71444		1456	-25.9577
1457	9.97518		1457	-11.8654		1457	36.4185		1457	-4.72607		1457	4.79091		1457	-25.9607
1458	9.95927		1458	-11.7145		1458	36.3121		1458	-4.72944		1458	4.95736		1458	-25.9642
1459	9.85653		1459	-11.5737		1459	36.2493		1459	-4.73656		1459	5.09596		1459	-25.9681
1460	9.67102		1460	-11.4385		1460	36.2621		1460	-4.74077		1460	5.12534		1460	-25.9725
1461	9.47712		1461	-11.3085		1461	36.2194		1461	-4.73478		1461	5.03367		1461	-25.9774
1462	9.4403		1462	-11.194		1462	36.1182		1462	-4.71663		1462	4.90098		1462	-25.9827
1463	9.67578		1463	-11.1008		1463	36.1027		1463	-4.69001		1463	4.81852		1463	-25.9886
1464	9.9979		1464	-11.0222		1464	36.1818		1464	-4.66362		1464	4.79536		1464	-25.995
1465	10.2226		1465	-10.95		1465	36.2531		1465	-4.64581		1465	4.82183		1465	-26.0018
1466	10.386		1466	-10.8821		1466	36.2766		1466	-4.63947		1466	4.87807		1466	-26.0092
1467	10.4327		1467	-10.8206		1467	36.2742		1467	-4.6437		1467	4.94356		1467	-26.0171
1468	10.2487		1468	-10.7693		1468	36.3278		1468	-4.65581		1468	4.99529		1468	-26.0254
1469	10.0017		1469	-10.7317		1469	36.4708		1469	-4.67301		1469	5.04016		1469	-26.0342
1470	9.8557		1470	-10.7118		1470	36.5902		1470	-4.69634		1470	5.13973		1470	-26.0434
1471	9.66091		1471	-10.7132		1471	36.5922		1471	-4.72561		1471	5.28546		1471	-26.053
1472	9.33457		1472	-10.7352		1472	36.5397		1472	-4.75324		1472	5.31509		1472	-26.063
1473	9.14095		1473	-10.7772		1473	36.5242		1473	-4.77248		1473	5.13723		1473	-26.0734
1474	9.25495		1474	-10.8403		1474	36.5627		1474	-4.78416		1474	4.90308		1474	-26.0841
1475	9.45646		1475	-10.9122		1475	36.6342		1475	-4.79204		1475	4.78783		1475	-26.095
1476	9.5455		1476	-10.9707		1476	36.712		1476	-4.79904		1476	4.78183		1476	-26.1063
1477	9.57771		1477	-11.008		1477	36.7807		1477	-4.80483		1477	4.81743		1477	-26.1178
1478	9.6627		1478	-11.0372		1478	36.8048		1478	-4.80349		1478	4.92002		1478	-26.1294
1479	9.80051		1479	-11.0771		1479	36.74		1479	-4.78932		1479	5.06478		1479	-26.1412
1480	9.90407		1480	-11.1344		1480	36.6085		1480	-4.76378		1480	5.06459		1480	-26.1531
1481	9.85016		1481	-11.2014		1481	36.4905		1481	-4.73373		1481	4.86791		1481	-26.1651
1482	9.61434		1482	-11.2671		1482	36.4472		1482	-4.70653		1482	4.71926		1482	-26.177
1483	9.39267		1483	-11.3256		1483	36.4285		1483	-4.68608		1483	4.76732		1483	-26.189
1484	9.33713		1484	-11.3799		1484	36.3378		1484	-4.67081		1484	4.91666		1484	-26.2009
1485	9.35186		1485	-11.4396		1485	36.2003		1485	-4.65821		1485	5.03513		1485	-26.2127
1486	9.28885		1486	-11.5086		1486	36.1123		1486	-4.64962		1486	5.00487		1486	-26.2243
1487	9.12192		1487	-11.5806		1487	36.1123		1487	-4.64732		1487	4.8092		1487	-26.2358
1488	8.86869		1488	-11.6498		1488	36.1629		1488	-4.65258		1488	4.58602		1488	-26.2469
1489	8.57184		1489	-11.719		1489	36.2244		1489	-4.66567		1489	4.5071		1489	-26.2578
1490	8.3584		1490	-11.7915		1490	36.2681		1490	-4.68407		1490	4.60634		1490	-26.2682
1491	8.30569		1491	-11.8675		1491	36.2726		1491	-4.70399		1491	4.72803		1491	-26.2783
1492	8.34964		1492	-11.9469		1492	36.2876		1492	-4.72472		1492	4.7742		1492	-26.2879
1493	8.43377		1493	-12.0306		1493	36.3707		1493	-4.74362		1493	4.83198		1493	-26.2969
1494	8.54503		1494	-12.1223		1494	36.4979		1494	-4.75342		1494	4.93372		1494	-26.3054
1495	8.65025		1495	-12.2286		1495	36.5833		1495	-4.75166		1495	4.96849		1495	-26.3133
1496	8.73838		1496	-12.3517		1496	36.5647		1496	-4.74211		1496	4.89782		1496	-26.3205
1497	8.81636		1497	-12.4863		1497	36.4646		1497	-4.73151		1497	4.81531		1497	-26.327
1498	8.79625		1498	-12.625		1498	36.3516		1498	-4.72699		1498	4.74421		1498	-26.3327
1499	8.57005		1499	-12.7637		1499	36.2698		1499	-4.72792		1499	4.62281		1499	-26.3376
1500	8.25978		1500	-12.8998		1500	36.2196		1500	-4.72578		1500	4.49877		1500	-26.3417
1501	8.09009		1501	-13.0311		1501	36.1728		1501	-4.7175		1501	4.48657		1501	-26.3449
1502	8.07316		1502	-13.1568		1502	36.1675		1502	-4.70965		1502	4.58508		1502	-26.3472
1503	8.14189		1503	-13.2787		1503	36.2626		1503	-4.70553		1503	4.67147		1503	-26.3487
1504	8.33288		1504	-13.3982		1504	36.3498		1504	-4.70328		1504	4.69772		1504	-26.3492
1505	8.63168		1505	-13.5158		1505	36.3006		1505	-4.70448		1505	4.75145		1505	-26.3487
1506	8.85638		1506	-13.6346		1506	36.1904		1506	-4.71026		1506	4.84925		1506	-26.3474
1507	8.84387		1507	-13.7582		1507	36.1165		1507	-4.71716		1507	4.89959		1507	-26.3451
1508	8.67509		1508	-13.8847		1508	36.0594		1508	-4.72395		1508	4.91319		1508	-26.3419
1509	8.53835		1509	-14.0128		1509	36.0202		1509	-4.73407		1509	5.00452		1509	-26.3378
1510	8.49836		1510	-14.1447		1510	36.0149		1510	-4.75031		1510	5.23435		1510	-26.3328
1511	8.52845		1511	-14.2784		1511	36.022		1511	-4.77164		1511	5.55969		1511	-26.327
1512	8.59329		1512	-14.4097		1512	36.0253		1512	-4.79468		1512	5.78954		1512	-26.3203
1513	8.6695		1513	-14.5378		1513	36.0215		1513	-4.81435		1513	5.7819		1513	-26.3129
1514	8.75548		1514	-14.6614		1514	36.0608		1514	-4.82503		1514	5.65645		1514	-26.3047
1515	8.8367		1515	-14.7768		1515	36.2147		1515	-4.82613		1515	5.55242		1515	-26.2958
1516	8.94671		1516	-14.8848		1516	36.4148		1516	-4.8203		1516	5.47307		1516	-26.2862
1517	9.08985		1517	-14.994		1517	36.4483		1517	-4.80791		1517	5.43275		1517	-26.2761
1518	9.12002		1518	-15.1101		1518	36.2442		1518	-4.78938		1518	5.36361		1518	-26.2654
1519	8.96412		1519	-15.2306		1519	36.0106		1519	-4.76742		1519	5.13014		1519	-26.2542
1520	8.81167		1520	-15.3509		1520	35.9077		1520	-4.74276		1520	4.87248		1520	-26.2426
1521	8.9272		1521	-15.4647		1521	35.8698		1521	-4.71517		1521	4.87415		1521	-26.2306
1522	9.39009		1522	-15.5623		1522	35.8486		1522	-4.68972		1522	5.11666		1522	-26.2183
1523	10.0421		1523	-15.6296		1523	35.9119		1523	-4.67234		1523	5.35259		1523	-26.2057
1524	10.5685		1524	-15.651		1524	36.0858		1524	-4.66547		1524	5.46128		1524	-26.193
1525	10.7315		1525	-15.6274		1525	36.2359		1525	-4.66918		1525	5.5123		1525	-26.1802
1526	10.5197		1526	-15.5825		1526	36.2394		1526	-4.67776		1526	5.50005		1526	-26.1672
1527	10.0399		1527	-15.5368		1527	36.1522		1527	-4.68355		1527	5.31943		1527	-26.1543
1528	9.52935		1528	-15.4935		1528	36.0588		1528	-4.68618		1528	5.05018		1528	-26.1413
1529	9.23006		1529	-15.4533		1529	36.0187		1529	-4.69155		1529	4.82996		1529	-26.1286
1530	9.1121		1530	-15.4195		1530	36.1201		1530	-4.70594		1530	4.61867		1530	-26.1159
1531	9.05565		1531	-15.394		1531	36.3575		1531	-4.72873		1531	4.39993		1531	-26.1034
1532	9.08201		1532	-15.3765		1532	36.6084		1532	-4.75215		1532	4.27836		1532	-26.0912
1533	9.22923		1533	-15.3625		1533	36.7721		1533	-4.76869		1533	4.30421		1533	-26.0792
1534	9.37808		1534	-15.3471		1534	36.8269		1534	-4.77339		1534	4.4573		1534	-26.0675
1535	9.34421		1535	-15.3306		1535	36.7829		1535	-4.76347		1535	4.68797		1535	-26.0562
1536	9.1237		1536	-15.3158		1536	36.6603		1536	-4.74117		1536	4.83431		1536	-26.0452
1537	8.86613		1537	-15.3019		1537	36.498		1537	-4.71505		1537	4.79191		1537	-26.0346
1538	8.69156		1538	-15.2856		1538	36.3457		1538	-4.69085		1538	4.69984		1538	-26.0244
1539	8.66534		1539	-15.266		1539	36.2243		1539	-4.66714		1539	4.64896		1539	-26.0145
1540	8.75771		1540	-15.2436		1540	36.1347		1540	-4.64326		1540	4.60143		1540	-26.0051
1541	8.90219		1541	-15.2164		1541	36.1145		1541	-4.62201		1541	4.58705		1541	-25.9961
1542	9.15968		1542	-15.1815		1542	36.1988		1542	-4.60365		1542	4.68433		1542	-25.9874
1543	9.53233		1543	-15.1378		1543	36.3099		1543	-4.58721		1543	4.88452		1543	-25.9792
1544	9.84023		1544	-15.0841		1544	36.3361		1544	-4.57824		1544	5.01329		1544	-25.9713
1545	9.98167		1545	-15.018		1545	36.3266		1545	-4.58219		1545	4.95641		1545	-25.9638
1546	9.98602		1546	-14.942		1546	36.362		1546	-4.59231		1546	4.81113		1546	-25.9567
1547	9.93894		1547	-14.8639		1547	36.4134		1547	-4.59628		1547	4.70401		1547	-25.9499
1548	9.92915		1548	-14.79		1548	36.4323		1548	-4.59422		1548	4.69267		1548	-25.9435
1549	9.87735		1549	-14.7217		1549	36.4108		1549	-4.59556		1549	4.78559		1549	-25.9374
1550	9.62681		1550	-14.6594		1550	36.3947		1550	-4.60128		1550	4.90681		1550	-25.9317
1551	9.31355		1551	-14.6048		1551	36.4272		1551	-4.60623		1551	4.9105		1551	-25.9264
1552	9.23847		1552	-14.5562		1552	36.4754		1552	-4.61005		1552	4.75609		1552	-25.9214
1553	9.3577		1553	-14.5107		1553	36.4564		1553	-4.61417		1553	4.59211		1553	-25.9168
1554	9.42297		1554	-14.4785		1554	36.3667		1554	-4.61717		1554	4.52292		1554	-25.9125
1555	9.36954		1555	-14.4781		1555	36.3115		1555	-4.61929		1555	4.47175		1555	-25.9086
1556	9.22819		1556	-14.5137		1556	36.3627		1556	-4.62405		1556	4.39061		1556	-25.9052
1557	9.06812		1557	-14.5745		1557	36.5002		1557	-4.63027		1557	4.31599		1557	-25.9022
1558	8.9764		1558	-14.6512		1558	36.6854		1558	-4.6318		1558	4.30518		1558	-25.8996
1559	8.91295		1559	-14.7344		1559	36.844		1559	-4.62546		1559	4.42722		1559	-25.8974
1560	8.80503		1560	-14.8155		1560	36.8491		1560	-4.61341		1560	4.61585		1560	-25.8958
1561	8.74509		1561	-14.893		1561	36.6822		1561	-4.60334		1561	4.76674		1561	-25.8946
1562	8.82814		1562	-14.9658		1562	36.51		1562	-4.60365		1562	4.88212		1562	-25.8939
1563	9.01045		1563	-15.0269		1563	36.4326		1563	-4.61396		1563	4.9746		1563	-25.8938
1564	9.26835		1564	-15.0687		1564	36.3842		1564	-4.62978		1564	5.05264		1564	-25.8942
1565	9.60868		1565	-15.0922		1565	36.3027		1565	-4.64952		1565	5.10026		1565	-25.8952
1566	9.91295		1566	-15.1047		1566	36.2002		1566	-4.66955		1566	5.06095		1566	-25.8967
1567	9.97268		1567	-15.1136		1567	36.1645		1567	-4.68494		1567	4.9899		1567	-25.8988
1568	9.78243		1568	-15.1263		1568	36.2557		1568	-4.69647		1568	5.02844		1568	-25.9014
1569	9.62181		1569	-15.1516		1569	36.4138		1569	-4.70893		1569	5.14513		1569	-25.9047
1570	9.68322		1570	-15.1948		1570	36.5795		1570	-4.72348		1570	5.13431		1570	-25.9084
1571	9.81812		1571	-15.2548		1571	36.7464		1571	-4.73645		1571	4.92704		1571	-25.9128
1572	9.80908		1572	-15.3252		1572	36.8803		1572	-4.74446		1572	4.69316		1572	-25.9177
1573	9.65991		1573	-15.3985		1573	36.897		1573	-4.74722		1573	4.60471		1573	-25.9231
1574	9.48494		1574	-15.4717		1574	36.7395		1574	-4.74583		1574	4.61848		1574	-25.9291
1575	9.3674		1575	-15.5421		1575	36.4518		1575	-4.74295		1575	4.56789		1575	-25.9356
1576	9.29258		1576	-15.6037		1576	36.1607		1576	-4.74077		1576	4.45222		1576	-25.9425
1577	9.12002		1577	-15.6562		1577	35.9715		1577	-4.73929		1577	4.37902		1577	-25.95
1578	8.81641		1578	-15.7069		1578	35.9141		1578	-4.73728		1578	4.29927		1578	-25.9579
1579	8.57079		1579	-15.7602		1579	35.9309		1579	-4.72976		1579	4.17933		1579	-25.9663
1580	8.49631		1580	-15.8183		1580	35.9508		1580	-4.71278		1580	4.17624		1580	-25.9751
1581	8.54385		1581	-15.8812		1581	35.9467		1581	-4.69065		1581	4.34961		1581	-25.9844
1582	8.68216		1582	-15.9481		1582	35.9323		1582	-4.66978		1582	4.57032		1582	-25.994
1583	8.92941		1583	-16.018		1583	35.9641		1583	-4.6523		1583	4.78046		1583	-26.0041
1584	9.27593		1584	-16.0861		1584	36.0364		1584	-4.64173		1584	4.99539		1584	-26.0145
1585	9.68149		1585	-16.1457		1585	36.051		1585	-4.64267		1585	5.1476		1585	-26.0253
1586	10.0216		1586	-16.1974		1586	35.9509		1586	-4.65304		1586	5.13795		1586	-26.0364
1587	10.0559		1587	-16.2483		1587	35.7896		1587	-4.66783		1587	4.9586		1587	-26.0479
1588	9.74451		1588	-16.3077		1588	35.6314		1588	-4.68522		1588	4.74162		1588	-26.0596
1589	9.37372		1589	-16.3831		1589	35.5343		1589	-4.70222		1589	4.62479		1589	-26.0717
1590	9.19192		1590	-16.4716		1590	35.5695		1590	-4.71412		1590	4.5824		1590	-26.0841
1591	9.08387		1591	-16.5605		1591	35.6731		1591	-4.72073		1591	4.54822		1591	-26.0967
1592	8.8732		1592	-16.64		1592	35.7417		1592	-4.7254		1592	4.53393		1592	-26.1095
1593	8.68659		1593	-16.7109		1593	35.8087		1593	-4.72766		1593	4.5431		1593	-26.1226
1594	8.67735		1594	-16.777		1594	35.8869		1594	-4.72445		1594	4.55901		1594	-26.1359
1595	8.78908		1595	-16.8353		1595	35.9538		1595	-4.71708		1595	4.56955		1595	-26.1493
1596	8.89063		1596	-16.8832		1596	36.0098		1596	-4.7071		1596	4.55732		1596	-26.1629
1597	8.94207		1597	-16.9282		1597	36.0022		1597	-4.69408		1597	4.536		1597	-26.1766
1598	8.9731		1598	-16.9784		1598	35.9071		1598	-4.68023		1598	4.52128		1598	-26.1903
1599	9.07619		1599	-17.032		1599	35.8106		1599	-4.66932		1599	4.45824		1599	-26.2042
1600	9.3591		1600	-17.0724		1600	35.7978		1600	-4.66526		1600	4.33515		1600	-26.218
1601	9.74041		1601	-17.0707		1601	35.8553		1601	-4.66978		1601	4.29209		1601	-26.2318
1602	10.0403		1602	-17.0045		1602	35.8889		1602	-4.67671		1602	4.42846		1602	-26.2456
1603	10.2339		1603	-16.8708		1603	35.8458		1603	-4.67932		1603	4.66304		1603	-26.2594
1604	10.3731		1604	-16.6778		1604	35.8285		1604	-4.68238		1604	4.87699		1604	-26.273
1605	10.4184		1605	-16.4372		1605	35.9207		1605	-4.69372		1605	5.01279		1605	-26.2865
1606	10.3458		1606	-16.1652		1606	35.9886		1606	-4.70918		1606	5.05619		1606	-26.2998
1607	10.2256		1607	-15.8772		1607	35.8967		1607	-4.71661		1607	4.99548		1607	-26.313
1608	10.2041		1608	-15.585		1608	35.7438		1608	-4.71128		1608	4.82156		1608	-26.3259
1609	10.3916		1609	-15.2957		1609	35.707		1609	-4.70063		1609	4.61814		1609	-26.3386
1610	10.5896		1610	-15.0114		1610	35.8372		1610	-4.69649		1610	4.54168		1610	-26.3511
1611	10.5188		1611	-14.7319		1611	36.0344		1611	-4.70446		1611	4.63156		1611	-26.3633
1612	10.2395		1612	-14.4545		1612	36.1268		1612	-4.71893		1612	4.73765		1612	-26.3752
1613	10.0636		1613	-14.1777		1613	36.0928		1613	-4.73102		1613	4.70254		1613	-26.3868
1614	10.2179		1614	-13.9064		1614	36.0543		1614	-4.73798		1614	4.57214		1614	-26.3981
1615	10.5552		1615	-13.6478		1615	36.031		1615	-4.74062		1615	4.50448		1615	-26.4091
1616	10.8478		1616	-13.4044		1616	36.0002		1616	-4.74036		1616	4.51717		1616	-26.4197
1617	11.0846		1617	-13.1763		1617	36.0053		1617	-4.7386		1617	4.54535		1617	-26.4299
1618	11.2724		1618	-12.9612		1618	36.0348		1618	-4.73623		1618	4.61933		1618	-26.4398
1619	11.3204		1619	-12.7513		1619	35.9883		1619	-4.7326		1619	4.71502		1619	-26.4493
1620	11.1355		1620	-12.5364		1620	35.8514		1620	-4.72451		1620	4.70475		1620	-26.4585
1621	10.8136		1621	-12.3125		1621	35.7451		1621	-4.712		1621	4.61649		1621	-26.4672
1622	10.6111		1622	-12.0858		1622	35.7349		1622	-4.69956		1622	4.61249		1622	-26.4755
1623	10.6354		1623	-11.8628		1623	35.7715		1623	-4.68938		1623	4.70855		1623	-26.4835
1624	10.8018		1624	-11.6409		1624	35.8155		1624	-4.68332		1624	4.77257		1624	-26.4911
1625	11.0505		1625	-11.4165		1625	35.9057		1625	-4.68412		1625	4.74988		1625	-26.4982
1626	11.2922		1626	-11.1918		1626	36.0637		1626	-4.68934		1626	4.74542		1626	-26.505
1627	11.3432		1627	-10.9662		1627	36.2044		1627	-4.69437		1627	4.85358		1627	-26.5113
1628	11.1394		1628	-10.7377		1628	36.2431		1628	-4.69888		1628	4.99213		1628	-26.5173
1629	10.7128		1629	-10.5215		1629	36.1859		1629	-4.70522		1629	5.03847		1629	-26.5229
1630	10.1196		1630	-10.3509		1630	36.1279		1630	-4.71278		1630	4.99167		1630	-26.5281
1631	9.60039		1631	-10.2554		1631	36.2029		1631	-4.71757		1631	4.91408		1631	-26.5329
1632	9.39261		1632	-10.2408		1632	36.366		1632	-4.71744		1632	4.82488		1632	-26.5374
1633	9.43483		1633	-10.2848		1633	36.4282		1633	-4.71236		1633	4.73555		1633	-26.5415
1634	9.56849		1634	-10.3593		1634	36.3705		1634	-4.70501		1634	4.66865		1634	-26.5453
1635	9.71536		1635	-10.4475		1635	36.3162		1635	-4.70053		1635	4.59012		1635	-26.5488
1636	9.80374		1636	-10.538		1636	36.3392		1636	-4.70018		1636	4.48457		1636	-26.5521
1637	9.81944		1637	-10.6218		1637	36.4009		1637	-4.70093		1637	4.40492		1637	-26.555
1638	9.81974		1638	-10.6973		1638	36.3883		1638	-4.69944		1638	4.39804		1638	-26.5577
1639	9.79047		1639	-10.7683		1639	36.2713		1639	-4.6948		1639	4.4624		1639	-26.5602
1640	9.72035		1640	-10.8365		1640	36.1395		1640	-4.68962		1640	4.52867		1640	-26.5626
1641	9.67727		1641	-10.8983		1641	36.0917		1641	-4.68558		1641	4.56786		1641	-26.5647
1642	9.70507		1642	-10.9478		1642	36.145		1642	-4.67786		1642	4.63272		1642	-26.5667
1643	9.85145		1643	-10.979		1643	36.2198		1643	-4.66017		1643	4.70612		1643	-26.5687
1644	10.1543		1644	-10.9819		1644	36.2356		1644	-4.63785		1644	4.80177		1644	-26.5705
1645	10.6167		1645	-10.9429		1645	36.1917		1645	-4.62344		1645	5.00934		1645	-26.5722
1646	11.1564		1646	-10.8626		1646	36.1339		1646	-4.61879		1646	5.23101		1646	-26.5738
1647	11.5449		1647	-10.7595		1647	36.1393		1647	-4.61589		1647	5.2752		1647	-26.5755
1648	11.6784		1648	-10.6514		1648	36.2423		1648	-4.6105		1648	5.18766		1648	-26.577
1649	11.7482		1649	-10.5466		1649	36.3484		1649	-4.60917		1649	5.10649		1649	-26.5785
1650	11.886		1650	-10.4472		1650	36.3381		1650	-4.62383		1650	4.98551		1650	-26.58
1651	11.8697		1651	-10.3599		1651	36.2417		1651	-4.65493		1651	4.74209		1651	-26.5814
1652	11.545		1652	-10.3071		1652	36.1471		1652	-4.68714		1652	4.46995		1652	-26.5828
1653	11.1018		1653	-10.3065		1653	36.0576		1653	-4.70822		1653	4.31631		1653	-26.5841
1654	10.765		1654	-10.3522		1654	36.0134		1654	-4.72012		1654	4.2966		1654	-26.5852
1655	10.63		1655	-10.4283		1655	36.0754		1655	-4.72817		1655	4.35471		1655	-26.5862
1656	10.6953		1656	-10.5216		1656	36.2153		1656	-4.73239		1656	4.47698		1656	-26.5871
1657	10.8866		1657	-10.6178		1657	36.3542		1657	-4.73091		1657	4.63765		1657	-26.5877
1658	11.0601		1658	-10.705		1658	36.3882		1658	-4.72437		1658	4.76396		1658	-26.588
1659	11.0757		1659	-10.7834		1659	36.2488		1659	-4.71433		1659	4.79495		1659	-26.5881
1660	10.9357		1660	-10.8576		1660	35.9857		1660	-4.7007		1660	4.71947		1660	-26.5878
1661	10.6831		1661	-10.9245		1661	35.7359		1661	-4.68394		1661	4.60048		1661	-26.5871
1662	10.368		1662	-10.9792		1662	35.6298		1662	-4.66798		1662	4.58206		1662	-26.586
1663	10.2082		1663	-11.0189		1663	35.7118		1663	-4.65859		1663	4.77486		1663	-26.5844
1664	10.3903		1664	-11.0427		1664	35.9227		1664	-4.65783		1664	5.12887		1664	-26.5821
1665	10.794		1665	-11.0544		1665	36.1415		1665	-4.66171		1665	5.49793		1665	-26.5793
1666	11.1162		1666	-11.0635		1666	36.245		1666	-4.6664		1666	5.80757		1666	-26.5759
1667	11.1652		1667	-11.0803		1667	36.2068		1667	-4.67185		1667	6.01952		1667	-26.5717
1668	10.9765		1668	-11.1158		1668	36.1449		1668	-4.67885		1668	5.99072		1668	-26.5668
1669	10.7585		1669	-11.1865		1669	36.187		1669	-4.68974		1669	5.66289		1669	-26.5612
1670	10.732		1670	-11.3006		1670	36.3175		1670	-4.70829		1670	5.23074		1670	-26.5546
1671	10.8861		1671	-11.4457		1671	36.4185		1671	-4.73217		1671	4.93202		1671	-26.5473
1672	11.0441		1672	-11.6048		1672	36.4455		1672	-4.75174		1672	4.83524		1672	-26.5391
1673	11.1477		1673	-11.7682		1673	36.4725		1673	-4.76109		1673	4.81584		1673	-26.5299
1674	11.2826		1674	-11.9297		1674	36.5128		1674	-4.76343		1674	4.67459		1674	-26.5199
1675	11.515		1675	-12.0884		1675	36.4819		1675	-4.76268		1675	4.41892		1675	-26.5089
1676	11.734		1676	-12.2435		1676	36.3855		1676	-4.75804		1676	4.27023		1676	-26.4969
1677	11.7167		1677	-12.3924		1677	36.2785		1677	-4.74853		1677	4.2964		1677	-26.4839
1678	11.3943		1678	-12.5347		1678	36.1636		1678	-4.73301		1678	4.36979		1678	-26.4699
1679	10.9386		1679	-12.6743		1679	36.0622		1679	-4.71155		1679	4.43376		1679	-26.4549
1680	10.588		1680	-12.8142		1680	35.9884		1680	-4.69232		1680	4.48089		1680	-26.4389
1681	10.4767		1681	-12.9539		1681	35.8933		1681	-4.68516		1681	4.50099		1681	-26.4218
1682	10.5924		1682	-13.0898		1682	35.8055		1682	-4.68702		1682	4.56615		1682	-26.4036
1683	10.807		1683	-13.2172		1683	35.8523		1683	-4.68584		1683	4.6528		1683	-26.3844
1684	10.9845		1684	-13.3324		1684	36.0379		1684	-4.67851		1684	4.617		1684	-26.3641
1685	11.1864		1685	-13.4316		1685	36.1873		1685	-4.67209		1685	4.48902		1685	-26.3427
1686	11.4542		1686	-13.5119		1686	36.168		1686	-4.67201		1686	4.49464		1686	-26.3202
1687	11.55		1687	-13.5643		1687	36.0094		1687	-4.67877		1687	4.67679		1687	-26.2965
1688	11.3613		1688	-13.5787		1688	35.8331		1688	-4.68956		1688	4.85082		1688	-26.2718
1689	11.1556		1689	-13.5598		1689	35.7886		1689	-4.70024		1689	4.94221		1689	-26.2458
1690	11.1657		1690	-13.5156		1690	35.9749		1690	-4.70967		1690	4.99713		1690	-26.2188
1691	11.374		1691	-13.4449		1691	36.2696		1691	-4.72051		1691	5.02075		1691	-26.1906
1692	11.7121		1692	-13.3495		1692	36.4384		1692	-4.73587		1692	4.9944		1692	-26.1612
1693	11.9977		1693	-13.241		1693	36.4455		1693	-4.75528		1693	4.93224		1693	-26.1307
1694	11.9982		1694	-13.1351		1694	36.4078		1694	-4.77427		1694	4.84173		1694	-26.0992
1695	11.7008		1695	-13.0448		1695	36.401		1695	-4.78537		1695	4.64161		1695	-26.0665
1696	11.2685		1696	-12.9703		1696	36.4296		1696	-4.78168		1696	4.30103		1696	-26.0328
1697	10.8819		1697	-12.8982		1697	36.4521		1697	-4.76522		1697	4.03444		1697	-25.998
1698	10.6242		1698	-12.819		1698	36.4156		1698	-4.74378		1698	4.08919		1698	-25.9624
1699	10.4565		1699	-12.7388		1699	36.2998		1699	-4.72145		1699	4.37152		1699	-25.9258
1700	10.303		1700	-12.6707		1700	36.1397		1700	-4.69949		1700	4.59331		1700	-25.8883
1701	10.1129		1701	-12.6221		1701	36.0369		1701	-4.68052		1701	4.66492		1701	-25.8502
1702	9.9687		1702	-12.5956		1702	36.0699		1702	-4.66912		1702	4.68563		1702	-25.8114
1703	10.0785		1703	-12.5869		1703	36.1841		1703	-4.66776		1703	4.76494		1703	-25.772
1704	10.4158		1704	-12.5814		1704	36.2715		1704	-4.67194		1704	4.89098		1704	-25.7323
1705	10.7425		1705	-12.5683		1705	36.3126		1705	-4.67382		1705	4.98245		1705	-25.6922
1706	11.0198		1706	-12.5519		1706	36.3708		1706	-4.67048		1706	5.05448		1706	-25.6519
1707	11.2956		1707	-12.5445		1707	36.452		1707	-4.665		1707	5.14131		1707	-25.6116
1708	11.4622		1708	-12.5583		1708	36.4819		1708	-4.66327		1708	5.21002		1708	-25.5713
1709	11.4702		1709	-12.6057		1709	36.4342		1709	-4.67362		1709	5.22702		1709	-25.5313
1710	11.4681		1710	-12.6969		1710	36.3601		1710	-4.70003		1710	5.15391		1710	-25.4917
1711	11.5012		1711	-12.8267		1711	36.3409		1711	-4.73244		1711	4.97192		1711	-25.4526
1712	11.4858		1712	-12.9749		1712	36.3784		1712	-4.756		1712	4.82322		1712	-25.4141
1713	11.4853		1713	-13.1247		1713	36.4134		1713	-4.7668		1713	4.84838		1713	-25.3765
1714	11.5837		1714	-13.2722		1714	36.4661		1714	-4.76915		1714	4.92214		1714	-25.3398
1715	11.6628		1715	-13.4201		1715	36.5301		1715	-4.76831		1715	4.81002		1715	-25.3042
1716	11.5649		1716	-13.569		1716	36.5242		1716	-4.76774		1716	4.49777		1716	-25.2698
1717	11.2749		1717	-13.716		1717	36.4484		1717	-4.76647		1717	4.2619		1717	-25.2368
1718	10.8433		1718	-13.8575		1718	36.3646		1718	-4.76029		1718	4.33993		1718	-25.2051
1719	10.4158		1719	-13.9941		1719	36.3128		1719	-4.7459		1719	4.59631		1719	-25.175
1720	10.1945		1720	-14.1285		1720	36.264		1720	-4.72515		1720	4.72747		1720	-25.1465
1721	10.2012		1721	-14.26		1721	36.1917		1721	-4.70592		1721	4.69693		1721	-25.1197
1722	10.2737		1722	-14.3883		1722	36.1716		1722	-4.69455		1722	4.68016		1722	-25.0946
1723	10.3507		1723	-14.5146		1723	36.228		1723	-4.69042		1723	4.69715		1723	-25.0713
1724	10.5895		1724	-14.6402		1724	36.2937		1724	-4.68962		1724	4.66466		1724	-25.0498
1725	11.0861		1725	-14.7653		1725	36.3304		1725	-4.68846		1725	4.69498		1725	-25.0303
1726	11.5822		1726	-14.888		1726	36.3092		1726	-4.68788		1726	4.93353		1726	-25.0125
1727	11.8175		1727	-15.0046		1727	36.2523		1727	-4.69174		1727	5.24297		1727	-24.9967
1728	11.8959		1728	-15.1117		1728	36.2741		1728	-4.7009		1728	5.36434		1728	-24.9827
1729	11.8432		1729	-15.2093		1729	36.4208		1729	-4.71588		1729	5.28507		1729	-24.9706
1730	11.5976		1730	-15.3011		1730	36.5812		1730	-4.73835		1730	5.15793		1730	-24.9603
1731	11.3642		1731	-15.3939		1731	36.6517		1731	-4.76547		1731	5.04811		1731	-24.9518
1732	11.3126		1732	-15.4917		1732	36.6648		1732	-4.79106		1732	4.9482		1732	-24.9451
1733	11.3521		1733	-15.592		1733	36.6903		1733	-4.81037		1733	4.85315		1733	-24.94
1734	11.3372		1734	-15.6905		1734	36.7672		1734	-4.82166		1734	4.76907		1734	-24.9366
1735	11.1963		1735	-15.7863		1735	36.86		1735	-4.8271		1735	4.71304		1735	-24.9347
1736	10.9895		1736	-15.8797		1736	36.8958		1736	-4.82747		1736	4.71498		1736	-24.9344
1737	10.7917		1737	-15.9683		1737	36.9016		1737	-4.8172		1737	4.75877		1737	-24.9355
1738	10.537		1738	-16.0491		1738	36.9182		1738	-4.79309		1738	4.80359		1738	-24.9379
1739	10.246		1739	-16.1218		1739	36.8382		1739	-4.76493		1739	4.84245		1739	-24.9417
1740	10.1237		1740	-16.1858		1740	36.5586		1740	-4.74434		1740	4.85864		1740	-24.9467
1741	10.2379		1741	-16.2316		1741	36.2127		1741	-4.73011		1741	4.83621		1741	-24.9528
1742	10.4444		1742	-16.2402		1742	36.0238		1742	-4.71475		1742	4.80164		1742	-24.96
1743	10.6391		1743	-16.1969		1743	36.0554		1743	-4.69568		1743	4.82679		1743	-24.9682
1744	10.8106		1744	-16.1089		1744	36.2194		1744	-4.6773		1744	4.93425		1744	-24.9773
1745	10.9646		1745	-16.0004		1745	36.4021		1745	-4.66446		1745	5.03766		1745	-24.9872
1746	11.111		1746	-15.8915		1746	36.5403		1746	-4.65603		1746	5.07624		1746	-24.9979
1747	11.2209		1747	-15.7862		1747	36.6247		1747	-4.65241		1747	5.08577		1747	-25.0094
1748	11.2762		1748	-15.6845		1748	36.6231		1748	-4.65857		1748	5.09603		1748	-25.0214
1749	11.4491		1749	-15.5932		1749	36.5356		1749	-4.6745		1749	5.09563		1749	-25.034
1750	11.948		1750	-15.5168		1750	36.4862		1750	-4.6976		1750	5.07851		1750	-25.0471
1751	12.5341		1751	-15.4527		1751	36.5417		1751	-4.72675		1751	5.01603		1751	-25.0606
1752	12.7837		1752	-15.3968		1752	36.6129		1752	-4.75682		1752	4.89932		1752	-25.0744
1753	12.7441		1753	-15.342		1753	36.6252		1753	-4.78108		1753	4.76082		1753	-25.0885
1754	12.7124		1754	-15.2827		1754	36.5914		1754	-4.79768		1754	4.60181		1754	-25.1029
1755	12.7289		1755	-15.2198		1755	36.5254		1755	-4.80795		1755	4.42665		1755	-25.1173
1756	12.6346		1756	-15.1452		1756	36.444		1756	-4.81158		1756	4.30779		1756	-25.1318
1757	12.3467		1757	-15.0415		1757	36.3985		1757	-4.80399		1757	4.27705		1757	-25.1463
1758	11.896		1758	-14.9069		1758	36.3962		1758	-4.78204		1758	4.28182		1758	-25.1608
1759	11.469		1759	-14.7547		1759	36.3815		1759	-4.75161		1759	4.30447		1759	-25.1751
1760	11.3283		1760	-14.5984		1760	36.3502		1760	-4.72087		1760	4.37917		1760	-25.1893
1761	11.506		1761	-14.4473		1761	36.3662		1761	-4.69332		1761	4.52349		1761	-25.2032
1762	11.7951		1762	-14.3062		1762	36.451		1762	-4.66991		1762	4.69355		1762	-25.2168
1763	12.0166		1763	-14.1764		1763	36.5261		1763	-4.65164		1763	4.75485		1763	-25.23
1764	12.0917		1764	-14.0557		1764	36.53		1764	-4.64066		1764	4.65824		1764	-25.2429
1765	12.0407		1765	-13.9461		1765	36.4797		1765	-4.63814		1765	4.54414		1765	-25.2553
1766	11.9098		1766	-13.8631		1766	36.3563		1766	-4.64212		1766	4.52203		1766	-25.2672
1767	11.6565		1767	-13.826		1767	36.148		1767	-4.64856		1767	4.59135		1767	-25.2787
1768	11.3183		1768	-13.8409		1768	35.9282		1768	-4.65447		1768	4.70094		1768	-25.2896
1769	11.0698		1769	-13.8982		1769	35.8342		1769	-4.6606		1769	4.80992		1769	-25.3
1770	10.9708		1770	-13.9676		1770	35.9647		1770	-4.66957		1770	4.91185		1770	-25.3099
1771	10.9257		1771	-14.0134		1771	36.2467		1771	-4.68111		1771	4.97614		1771	-25.3192
1772	10.9289		1772	-14.0274		1772	36.4952		1772	-4.69513		1772	4.93447		1772	-25.328
1773	11.065		1773	-14.0319		1773	36.6421		1773	-4.7136		1773	4.82117		1773	-25.3363
1774	11.3503		1774	-14.0537		1774	36.7293		1774	-4.73397		1774	4.84221		1774	-25.3441
1775	11.6675		1775	-14.1071		1775	36.7349		1775	-4.74895		1775	5.09867		1775	-25.3514
1776	11.8028		1776	-14.1942		1776	36.661		1776	-4.75392		1776	5.32036		1776	-25.3584
1777	11.5904		1777	-14.3065		1777	36.5759		1777	-4.74919		1777	5.23285		1777	-25.3649
1778	11.0763		1778	-14.4299		1778	36.4761		1778	-4.73407		1778	4.99405		1778	-25.3712
1779	10.5044		1779	-14.5543		1779	36.3473		1779	-4.70681		1779	4.85681		1779	-25.3771
1780	10.1316		1780	-14.6758		1780	36.2308		1780	-4.67263		1780	4.81858		1780	-25.3828
1781	10.0877		1781	-14.7916		1781	36.1514		1781	-4.64194		1781	4.8486		1781	-25.3883
1782	10.3664		1782	-14.9001		1782	36.1273		1782	-4.62132		1782	5.0357		1782	-25.3937
1783	10.8964		1783	-14.998		1783	36.1634		1783	-4.61451		1783	5.39371		1783	-25.399
1784	11.5235		1784	-15.0795		1784	36.2042		1784	-4.6242		1784	5.75362		1784	-25.4043
1785	12.0114		1785	-15.1439		1785	36.192		1785	-4.6459		1785	5.99244		1785	-25.4096
1786	12.1733		1786	-15.1995		1786	36.1779		1786	-4.66999		1786	6.1062		1786	-25.415
1787	12.0445		1787	-15.256		1787	36.2256		1787	-4.69004		1787	5.9748		1787	-25.4205
1788	11.8691		1788	-15.3178		1788	36.2839		1788	-4.70403		1788	5.54501		1788	-25.4263
1789	11.7721		1789	-15.3834		1789	36.3143		1789	-4.71571		1789	5.07883		1789	-25.4322
1790	11.6227		1790	-15.4475		1790	36.3502		1790	-4.73386		1790	4.81149		1790	-25.4383
1791	11.3435		1791	-15.5114		1791	36.3998		1791	-4.76185		1791	4.68389		1791	-25.4448
1792	11.0884		1792	-15.5869		1792	36.4219		1792	-4.79066		1792	4.56406		1792	-25.4515
1793	10.9436		1793	-15.6769		1793	36.4429		1793	-4.8079		1793	4.4964		1793	-25.4584
1794	10.8094		1794	-15.7618		1794	36.5041		1794	-4.81235		1794	4.55832		1794	-25.4657
1795	10.6537		1795	-15.8122		1795	36.5156		1795	-4.81167		1795	4.68156		1795	-25.4733
1796	10.5134		1796	-15.8137		1796	36.4651		1796	-4.80869		1796	4.87837		1796	-25.4811
1797	10.4154		1797	-15.7795		1797	36.4781		1797	-4.79917		1797	5.24846		1797	-25.4892
1798	10.3476		1798	-15.7316		1798	36.5801		1798	-4.78213		1798	5.67267		1798	-25.4975
1799	10.2596		1799	-15.6815		1799	36.6606		1799	-4.76281		1799	5.96782		1799	-25.5061
1800	10.1652		1800	-15.6331		1800	36.6331		1800	-4.74594		1800	6.10865		1800	-25.5148
1801	10.0924		1801	-15.5906		1801	36.5173		1801	-4.73449		1801	6.07435		1801	-25.5236
1802	10.0567		1802	-15.5614		1802	36.3892		1802	-4.72842		1802	5.99504		1802	-25.5325
1803	10.1205		1803	-15.5491		1803	36.3137		1803	-4.72066		1803	6.24332		1803	-25.5415
1804	10.3488		1804	-15.5408		1804	36.2639		1804	-4.70445		1804	6.87195		1804	-25.5504
1805	10.7878		1805	-15.5123		1805	36.2032		1805	-4.68257		1805	7.42658		1805	-25.5593
1806	11.3014		1806	-15.4533		1806	36.1531		1806	-4.66342		1806	7.53243		1806	-25.5681
1807	11.5274		1807	-15.3759		1807	36.1105		1807	-4.65329		1807	7.25476		1807	-25.5767
1808	11.2893		1808	-15.301		1808	36.0754		1808	-4.65426		1808	6.85909		1808	-25.5851
1809	10.7576		1809	-15.2514		1809	36.0806		1809	-4.66471		1809	6.49281		1809	-25.5933
1810	10.249		1810	-15.2447		1810	36.1513		1810	-4.68214		1810	6.20874		1810	-25.6012
1811	10.0615		1811	-15.2755		1811	36.284		1811	-4.70396		1811	6.04837		1811	-25.6088
1812	10.2946		1812	-15.3204		1812	36.4315		1812	-4.72364		1812	5.97118		1812	-25.616
1813	10.93		1813	-15.367		1813	36.5456		1813	-4.73328		1813	5.81952		1813	-25.6228
1814	11.9576		1814	-15.4206		1814	36.5954		1814	-4.733		1814	5.5014		1814	-25.6293
1815	13.1783		1815	-15.4855		1815	36.6359		1815	-4.7302		1815	5.09687		1815	-25.6354
1816	14.1604		1816	-15.5543		1816	36.79		1816	-4.7295		1816	4.76286		1816	-25.641
1817	14.4903		1817	-15.616		1817	36.9873		1817	-4.73153		1817	4.58964		1817	-25.6463
1818	14.0909		1818	-15.6596		1818	37.0464		1818	-4.73618		1818	4.51701		1818	-25.6511
1819	13.3054		1819	-15.6721		1819	36.9367		1819	-4.74108		1819	4.4515		1819	-25.6556
1820	12.5042		1820	-15.648		1820	36.6922		1820	-4.74199		1820	4.39311		1820	-25.6597
1821	11.8321		1821	-15.5959		1821	36.3947		1821	-4.73768		1821	4.37616		1821	-25.6635
1822	11.343		1822	-15.5294		1822	36.2173		1822	-4.72886		1822	4.42648		1822	-25.667
1823	11.1114		1823	-15.4599		1823	36.2623		1823	-4.71657		1823	4.55826		1823	-25.6702
1824	11.1798		1824	-15.3942		1824	36.4407		1824	-4.70651		1824	4.71266		1824	-25.6732
1825	11.4805		1825	-15.3349		1825	36.5853		1825	-4.70395		1825	4.83051		1825	-25.6761
1826	11.8321		1826	-15.28		1826	36.6417		1826	-4.70744		1826	4.91489		1826	-25.6788
1827	11.9925		1827	-15.2205		1827	36.6858		1827	-4.71433		1827	4.92237		1827	-25.6815
1828	11.8764		1828	-15.1482		1828	36.7625		1828	-4.72466		1828	4.79157		1828	-25.6841
1829	11.7057		1829	-15.0734		1829	36.7879		1829	-4.73841		1829	4.61096		1829	-25.6868
1830	11.7032		1830	-15.0205		1830	36.72		1830	-4.75283		1830	4.5568		1830	-25.6895
1831	11.8165		1831	-14.9974		1831	36.6046		1831	-4.76309		1831	4.69146		1831	-25.6924
1832	11.8689		1832	-14.9883		1832	36.4039		1832	-4.76659		1832	4.89171		1832	-25.6954
1833	11.8129		1833	-14.9732		1833	36.1067		1833	-4.76536		1833	4.99861		1833	-25.6986
1834	11.8033		1834	-14.9483		1834	35.846		1834	-4.76183		1834	5.02079		1834	-25.7021
1835	11.9661		1835	-14.9274		1835	35.7473		1835	-4.75527		1835	5.04187		1835	-25.7059
1836	12.1479		1836	-14.9208		1836	35.8302		1836	-4.7459		1836	4.99923		1836	-25.7099
1837	12.1051		1837	-14.9234		1837	36.029		1837	-4.73723		1837	4.80754		1837	-25.7143
1838	11.8362		1838	-14.9257		1838	36.2477		1838	-4.73202		1838	4.56444		1838	-25.719
1839	11.5219		1839	-14.9244		1839	36.3557		1839	-4.72947		1839	4.42169		1839	-25.724
1840	11.279		1840	-14.9182		1840	36.2789		1840	-4.72806		1840	4.41711		1840	-25.7294
1841	11.1298		1841	-14.8989		1841	36.1433		1841	-4.72854		1841	4.50205		1841	-25.7351
1842	11.0989		1842	-14.8533		1842	36.1349		1842	-4.72975		1842	4.62838		1842	-25.7411
1843	11.2458		1843	-14.7729		1843	36.2391		1843	-4.72993		1843	4.76638		1843	-25.7475
1844	11.5547		1844	-14.6593		1844	36.3163		1844	-4.73259		1844	4.88745		1844	-25.7541
1845	11.8644		1845	-14.5234		1845	36.3008		1845	-4.73943		1845	4.97045		1845	-25.761
1846	12.0048		1846	-14.3802		1846	36.1927		1846	-4.74512		1846	4.99306		1846	-25.7681
1847	11.8908		1847	-14.24		1847	36.0291		1847	-4.74685		1847	4.93182		1847	-25.7754
1848	11.563		1848	-14.1061		1848	35.907		1848	-4.74811		1848	4.7811		1848	-25.7829
1849	11.1698		1849	-13.9895		1849	35.8967		1849	-4.75194		1849	4.5933		1849	-25.7905
1850	10.8522		1850	-13.9116		1850	35.9649		1850	-4.75909		1850	4.4653		1850	-25.7982
1851	10.7183		1851	-13.884		1851	36.0554		1851	-4.76893		1851	4.44258		1851	-25.806
1852	10.7522		1852	-13.8953		1852	36.1424		1852	-4.78		1852	4.49839		1852	-25.8138
1853	10.8061		1853	-13.9231		1853	36.2196		1853	-4.79153		1853	4.57638		1853	-25.8216
1854	10.8311		1854	-13.9545		1854	36.2887		1854	-4.80398		1854	4.62848		1854	-25.8293
1855	10.8745		1855	-13.985		1855	36.337		1855	-4.81685		1855	4.61494		1855	-25.8371
1856	10.9544		1856	-14.0094		1856	36.3487		1856	-4.82688		1856	4.5643		1856	-25.8447
1857	11.0826		1857	-14.024		1857	36.2798		1857	-4.82938		1857	4.53174		1857	-25.8523
1858	11.3556		1858	-14.0287		1858	36.1031		1858	-4.82265		1858	4.48241		1858	-25.8597
1859	11.8303		1859	-14.0248		1859	35.9026		1859	-4.80943		1859	4.4191		1859	-25.867
1860	12.2148		1860	-14.0123		1860	35.819		1860	-4.79135		1860	4.43897		1860	-25.8741
1861	12.17		1861	-13.9908		1861	35.9121		1861	-4.76923		1861	4.61102		1861	-25.8811
1862	11.8783		1862	-13.9623		1862	36.0926		1862	-4.74921		1862	4.87526		1862	-25.888
1863	11.7702		1863	-13.9276		1863	36.1874		1863	-4.73898		1863	5.07011		1863	-25.8947
1864	11.8971		1864	-13.8873		1864	36.1173		1864	-4.73793		1864	5.08505		1864	-25.9013
1865	12.1113		1865	-13.8455		1865	35.9902		1865	-4.74016		1865	4.99784		1865	-25.9078
1866	12.4103		1866	-13.8081		1866	35.8972		1866	-4.74417		1866	4.92311		1866	-25.9141
1867	12.7139		1867	-13.7774		1867	35.7764		1867	-4.75108		1867	4.85843		1867	-25.9204
1868	12.8509		1868	-13.7528		1868	35.6296		1868	-4.76159		1868	4.80552		1868	-25.9266
1869	12.8212		1869	-13.7357		1869	35.6057		1869	-4.7762		1869	4.76639		1869	-25.9327
1870	12.7004		1870	-13.7281		1870	35.7368		1870	-4.79365		1870	4.71872		1870	-25.9388
1871	12.5225		1871	-13.7256		1871	35.8659		1871	-4.80964		1871	4.63214		1871	-25.9449
1872	12.3406		1872	-13.7219		1872	35.8991		1872	-4.82041		1872	4.49888		1872	-25.951
1873	12.1873		1873	-13.7195		1873	35.9397		1873	-4.82912		1873	4.43013		1873	-25.9571
1874	12.1061		1874	-13.7241		1874	36.0719		1874	-4.84091		1874	4.47662		1874	-25.9632
1875	12.1032		1875	-13.7332		1875	36.2276		1875	-4.8531		1875	4.52114		1875	-25.9694
1876	12.0719		1876	-13.7377		1876	36.3713		1876	-4.86001		1876	4.51682		1876	-25.9757
1877	11.9622		1877	-13.7325		1877	36.4837		1877	-4.86087		1877	4.48968		1877	-25.982
1878	11.8875		1878	-13.7241		1878	36.4607		1878	-4.85513		1878	4.4497		1878	-25.9885
1879	11.8403		1879	-13.7212		1879	36.2997		1879	-4.83785		1879	4.49328		1879	-25.995
1880	11.5874		1880	-13.7251		1880	36.1389		1880	-4.80795		1880	4.65552		1880	-26.0017
1881	11.0817		1881	-13.7315		1881	36.0587		1881	-4.775		1881	4.77799		1881	-26.0084
1882	10.5691		1882	-13.7367		1882	36.0422		1882	-4.74807		1882	4.7921		1882	-26.0153
1883	10.2593		1883	-13.7383		1883	36.0875		1883	-4.72987		1883	4.81607		1883	-26.0223
1884	10.1982		1884	-13.7335		1884	36.2044		1884	-4.72352		1884	4.88754		1884	-26.0294
1885	10.3326		1885	-13.7169		1885	36.3157		1885	-4.72716		1885	4.92583		1885	-26.0365
1886	10.5443		1886	-13.6854		1886	36.3226		1886	-4.73205		1886	4.88609		1886	-26.0438
1887	10.7798		1887	-13.6471		1887	36.2186		1887	-4.73422		1887	4.84208		1887	-26.0511
1888	11.1554		1888	-13.6157		1888	36.0993		1888	-4.73547		1888	4.9009		1888	-26.0585
1889	11.7372		1889	-13.5985		1889	36.0738		1889	-4.73855		1889	4.97409		1889	-26.0659
1890	12.2471		1890	-13.5926		1890	36.142		1890	-4.74655		1890	4.83876		1890	-26.0733
1891	12.3797		1891	-13.5895		1891	36.2106		1891	-4.75949		1891	4.4949		1891	-26.0807
1892	12.2617		1892	-13.5812		1892	36.232		1892	-4.77481		1892	4.16994		1892	-26.0881
1893	12.088		1893	-13.565		1893	36.2465		1893	-4.79015		1893	4.03249		1893	-26.0956
1894	11.8167		1894	-13.5467		1894	36.2647		1894	-4.80281		1894	4.08355		1894	-26.1029
1895	11.4823		1895	-13.5332		1895	36.2328		1895	-4.81103		1895	4.17064		1895	-26.1102
1896	11.1557		1896	-13.5254		1896	36.1239		1896	-4.81468		1896	4.21914		1896	-26.1175
1897	10.7951		1897	-13.522		1897	35.9787		1897	-4.81474		1897	4.35737		1897	-26.1247
1898	10.4575		1898	-13.5211		1898	35.8938		1898	-4.81283		1898	4.54085		1898	-26.1318
1899	10.2879		1899	-13.5172		1899	35.9168		1899	-4.80865		1899	4.56736		1899	-26.1388
1900	10.3477		1900	-13.5061		1900	36.007		1900	-4.79869		1900	4.51966		1900	-26.1457
1901	10.6221		1901	-13.4893		1901	36.1253		1901	-4.78166		1901	4.54679		1901	-26.1525
1902	11.0205		1902	-13.4702		1902	36.2426		1902	-4.76202		1902	4.58805		1902	-26.1592
1903	11.3384		1903	-13.4472		1903	36.2904		1903	-4.74475		1903	4.60007		1903	-26.1657
1904	11.3696		1904	-13.4143		1904	36.2157		1904	-4.73208		1904	4.6327		1904	-26.1721
1905	11.1583		1905	-13.373		1905	36.094		1905	-4.72764		1905	4.7219		1905	-26.1785
1906	10.932		1906	-13.3333		1906	36.032		1906	-4.73446		1906	4.82408		1906	-26.1846
1907	10.8098		1907	-13.2968		1907	36.0127		1907	-4.74743		1907	4.82607		1907	-26.1907
1908	10.7923		1908	-13.2582		1908	35.9778		1908	-4.75846		1908	4.72182		1908	-26.1966
1909	10.8028		1909	-13.2167		1909	35.9636		1909	-4.76543		1909	4.65961		1909	-26.2024
1910	10.7908		1910	-13.1741		1910	35.9971		1910	-4.77166		1910	4.71271		1910	-26.208
1911	10.8429		1911	-13.131		1911	36.0179		1911	-4.78073		1911	4.7589		1911	-26.2135
1912	10.9164		1912	-13.092		1912	35.9989		1912	-4.79042		1912	4.64601		1912	-26.2189
1913	10.8035		1913	-13.061		1913	35.9828		1913	-4.79493		1913	4.43399		1913	-26.2241
1914	10.5913		1914	-13.0357		1914	35.977		1914	-4.79297		1914	4.31039		1914	-26.2292
1915	10.5555		1915	-13.0139		1915	35.952		1915	-4.78605		1915	4.30365		1915	-26.2341
1916	10.7054		1916	-12.9964		1916	35.9113		1916	-4.77577		1916	4.31019		1916	-26.2389
1917	10.8636		1917	-12.9852		1917	35.8725		1917	-4.76438		1917	4.27367		1917	-26.2435
1918	10.921		1918	-12.9802		1918	35.8806		1918	-4.75282		1918	4.18485		1918	-26.2479
1919	10.8861		1919	-12.9776		1919	35.9761		1919	-4.73987		1919	4.08898		1919	-26.2522
1920	10.9174		1920	-12.9714		1920	36.1718		1920	-4.72393		1920	4.07707		1920	-26.2563
1921	11.1707		1921	-12.9598		1921	36.4798		1921	-4.70745		1921	4.1777		1921	-26.2601
1922	11.5027		1922	-12.9452		1922	36.8389		1922	-4.69651		1922	4.34887		1922	-26.2638
1923	11.5726		1923	-12.9281		1923	37.0623		1923	-4.69251		1923	4.52857		1923	-26.2673
1924	11.2765		1924	-12.9049		1924	37.028		1924	-4.69123		1924	4.67181		1924	-26.2706
1925	10.9431		1925	-12.874		1925	36.8839		1925	-4.68862		1925	4.75835		1925	-26.2737
1926	10.8671		1926	-12.8416		1926	36.8427		1926	-4.68366		1926	4.78235		1926	-26.2765
1927	10.9451		1927	-12.8175		1927	36.8553		1927	-4.68055		1927	4.82101		1927	-26.2791
1928	10.856		1928	-12.8059		1928	36.761		1928	-4.68662		1928	4.90632		1928	-26.2814
1929	10.3972		1929	-12.8079		1929	36.6075		1929	-4.7049		1929	4.90557		1929	-26.2835
1930	9.74211		1930	-12.8255		1930	36.5776		1930	-4.72969		1930	4.7896		1930	-26.2853
1931	9.22126		1931	-12.8573		1931	36.7278		1931	-4.75074		1931	4.67813		1931	-26.2869
1932	8.96317		1932	-12.8923		1932	36.9658		1932	-4.76245		1932	4.601		1932	-26.2882
1933	8.90483		1933	-12.9207		1933	37.1771		1933	-4.76753		1933	4.54239		1933	-26.2891
1934	8.91627		1934	-12.9471		1934	37.324		1934	-4.77124		1934	4.51747		1934	-26.2899
1935	8.86675		1935	-12.9792		1935	37.4502		1935	-4.7762		1935	4.52084		1935	-26.2903
1936	8.72643		1936	-13.0167		1936	37.5306		1936	-4.78058		1936	4.54741		1936	-26.2905
1937	8.55058		1937	-13.0664		1937	37.4525		1937	-4.7806		1937	4.56088		1937	-26.2903
1938	8.42418		1938	-13.1474		1938	37.214		1938	-4.77486		1938	4.53054		1938	-26.29
1939	8.46879		1939	-13.2676		1939	36.9593		1939	-4.76379		1939	4.49059		1939	-26.2893
1940	8.63902		1940	-13.4104		1940	36.8023		1940	-4.74863		1940	4.49409		1940	-26.2885
1941	8.65042		1941	-13.5506		1941	36.709		1941	-4.73138		1941	4.56828		1941	-26.2874
1942	8.42865		1942	-13.6763		1942	36.5648		1942	-4.71378		1942	4.68432		1942	-26.2861
1943	8.30298		1943	-13.7897		1943	36.3863		1943	-4.698		1943	4.79245		1943	-26.2846
1944	8.51629		1944	-13.8892		1944	36.3445		1944	-4.68885		1944	4.90185		1944	-26.283
1945	8.90202		1945	-13.9618		1945	36.5391		1945	-4.69111		1945	5.02274		1945	-26.2813
1946	9.22902		1946	-13.9937		1946	36.8702		1946	-4.70401		1946	5.07123		1946	-26.2795
1947	9.40537		1947	-13.9821		1947	37.1186		1947	-4.72114		1947	4.99994		1947	-26.2777
1948	9.41812		1948	-13.942		1948	37.137		1948	-4.73699		1948	4.90179		1948	-26.2758
1949	9.38786		1949	-13.8976		1949	37.0218		1949	-4.7513		1949	4.79519		1949	-26.274
1950	9.35275		1950	-13.866		1950	36.9909		1950	-4.76621		1950	4.61033		1950	-26.2724
1951	9.15897		1951	-13.849		1951	37.0962		1951	-4.78026		1951	4.44994		1951	-26.2709
1952	8.83395		1952	-13.8408		1952	37.1977		1952	-4.78967		1952	4.42595		1952	-26.2696
1953	8.62147		1953	-13.8395		1953	37.2086		1953	-4.79454		1953	4.50274		1953	-26.2686
1954	8.63103		1954	-13.8469		1954	37.1938		1954	-4.79847		1954	4.63874		1954	-26.2679
1955	8.80822		1955	-13.8663		1955	37.2028		1955	-4.80201		1955	4.75548		1955	-26.2677
1956	9.07059		1956	-13.8958		1956	37.2078		1956	-4.80142		1956	4.75093		1956	-26.268
1957	9.32896		1957	-13.9268		1957	37.1771		1957	-4.7939		1957	4.64234		1957	-26.2688
1958	9.50074		1958	-13.9536		1958	37.1255		1958	-4.78111		1958	4.55011		1958	-26.2703
1959	9.5196		1959	-13.9761		1959	37.1115		1959	-4.76599		1959	4.54273		1959	-26.2726
1960	9.37441		1960	-13.9927		1960	37.1587		1960	-4.74874		1960	4.61796		1960	-26.2756
1961	9.20504		1961	-13.9973		1961	37.2241		1961	-4.72917		1961	4.75795		1961	-26.2796
1962	9.21796		1962	-13.9867		1962	37.2841		1962	-4.70894		1962	4.8822		1962	-26.2845
1963	9.35472		1963	-13.9671		1963	37.3335		1963	-4.6922		1963	4.87441		1963	-26.2905
1964	9.42112		1964	-13.9445		1964	37.2949		1964	-4.68601		1964	4.73407		1964	-26.2977
1965	9.60057		1965	-13.9165		1965	37.0947		1965	-4.69517		1965	4.61086		1965	-26.3061
1966	10.1248		1966	-13.874		1966	36.858		1966	-4.716		1966	4.60535		1966	-26.3158
1967	10.6354		1967	-13.8025		1967	36.7932		1967	-4.7398		1967	4.67677		1967	-26.327
1968	10.7353		1968	-13.693		1968	36.8969		1968	-4.76139		1968	4.73505		1968	-26.3396
1969	10.5623		1969	-13.5575		1969	37.0306		1969	-4.78075		1969	4.71777		1969	-26.3537
1970	10.3359		1970	-13.4168		1970	37.1297		1970	-4.79709		1970	4.6479		1970	-26.3695
1971	10.147		1971	-13.2833		1971	37.2014		1971	-4.8065		1971	4.56111		1971	-26.3868
1972	10.0965		1972	-13.1623		1972	37.291		1972	-4.80823		1972	4.44867		1972	-26.4058
1973	10.1219		1973	-13.0528		1973	37.4294		1973	-4.80779		1973	4.33626		1973	-26.4266
1974	10.0566		1974	-12.9471		1974	37.5351		1974	-4.81207		1974	4.27259		1974	-26.449
1975	9.99963		1975	-12.8372		1975	37.5168		1975	-4.82443		1975	4.26756		1975	-26.4731
1976	10.1856		1976	-12.7208		1976	37.4592		1976	-4.8423		1976	4.30596		1976	-26.4989
1977	10.5184		1977	-12.6001		1977	37.4767		1977	-4.85868		1977	4.35008		1977	-26.5263
1978	10.5791		1978	-12.4798		1978	37.5196		1978	-4.86607		1978	4.38727		1978	-26.5553
1979	10.2115		1979	-12.3661		1979	37.488		1979	-4.85969		1979	4.47332		1979	-26.5858
1980	9.7491		1980	-12.2621		1980	37.3707		1980	-4.84122		1980	4.62207		1980	-26.6178
1981	9.50661		1981	-12.1625		1981	37.2409		1981	-4.81855		1981	4.7298		1981	-26.651
1982	9.50875		1982	-12.0581		1982	37.1605		1982	-4.79884		1982	4.6987		1982	-26.6855
1983	9.7329		1983	-11.9423		1983	37.089		1983	-4.78685		1983	4.60289		1983	-26.7211
1984	10.1908		1984	-11.812		1984	37.0017		1984	-4.7846		1984	4.5939		1984	-26.7576
1985	10.7793		1985	-11.6685		1985	37.0034		1985	-4.78707		1985	4.71012		1985	-26.7949
1986	11.3457		1986	-11.5214		1986	37.1235		1986	-4.7879		1986	4.88241		1986	-26.8328
1987	11.7737		1987	-11.3856		1987	37.2286		1987	-4.78728		1987	5.00497		1987	-26.8713
1988	12.0102		1988	-11.2704		1988	37.2835		1988	-4.78765		1988	5.00896		1988	-26.91
1989	12.0772		1989	-11.1756		1989	37.3926		1989	-4.79046		1989	4.93062		1989	-26.9488
1990	11.9833		1990	-11.0919		1990	37.5412		1990	-4.79886		1990	4.83323		1990	-26.9876
1991	11.7049		1991	-11.009		1991	37.5699		1991	-4.81216		1991	4.69644		1991	-27.0263
1992	11.1745		1992	-10.9241		1992	37.4418		1992	-4.82278		1992	4.54652		1992	-27.0645
1993	10.4038		1993	-10.8412		1993	37.3367		1993	-4.82755		1993	4.48524		1993	-27.1022
1994	9.66802		1994	-10.7625		1994	37.3538		1994	-4.83086		1994	4.54422		1994	-27.1393
1995	9.20839		1995	-10.6789		1995	37.3962		1995	-4.83352		1995	4.64795		1995	-27.1756
1996	8.97532		1996	-10.5718		1996	37.4173		1996	-4.83039		1996	4.69253		1996	-27.2109
1997	8.87028		1997	-10.4323		1997	37.4805		1997	-4.81907		1997	4.68206		1997	-27.2451
[truncated: 20,198 more rows]

## Sheet: Fig 2b
Time (s)	0	20	40	60	80	100	120	140	160	180	200	220	240	260	280	300
Normalized intensity	1	0.9855	1.0313	1.1755	1.1617	1.3312	1.4433	1.4927	1.5389	1.7245	1.6528	1.7639	1.8661	1.9556	2.0253	1.9952
	1	0.9391	0.9474	1.3216	1.5776	1.6634	1.7	1.7348	1.7361	1.7296	1.7708	1.7957	1.8153	1.8562	1.8696	2.0346
	1	0.9318	1.1335	1.3769	1.4509	1.5125	1.6027	1.6516	1.687	1.7537	1.8619	1.9259	1.9891	2.0089	2.1221	2.2007
	1	1	1.0332	0.917	0.9656	1.0065	1.1025	1.1382	1.1447	1.2272	1.3009	1.2099	1.2384	1.2204	1.2771	1.2973
	1	0.9386	1.0508	1.0734	1.2766	1.4141	1.3876	1.5072	1.5683	1.6718	1.7232	1.7988	1.834	2.0459	2.0567	2.1054
mean	1	0.959	1.0392	1.1729	1.2865	1.3855	1.4472	1.5049	1.535	1.6214	1.6619	1.6988	1.7486	1.8174	1.8702	1.9266
SEM	0	0.014	0.0296	0.0834	0.1073	0.1097	0.1026	0.1022	0.1042	0.0994	0.0964	0.1253	0.1311	0.1526	0.154	0.1612

## Sheet: Fig 2d
Time (s)	0	10	20	30	40	50	60	70	80	90	100
Normalized intensity	1	1.0023	0.932	0.4344	0.3217	0.2972	0.2861	0.2847	0.2915	0.2823	0.2809
	1	0.9762	0.9816	0.4034	0.3039	0.2629	0.2515	0.2184	0.215	0.2054	0.2098
	1	1.0016	1.0153	0.4795	0.3329	0.2623	0.2309	0.2113	0.1975	0.1901	0.1851
	1	0.986	0.9975	0.5411	0.3791	0.2865	0.2372	0.2108	0.1886	0.1764	0.1666
mean	1	0.9915	0.9816	0.4646	0.3344	0.2772	0.2514	0.2313	0.2232	0.2136	0.2106
SEM	0	0.0063442	0.0179	0.0299	0.0161	0.0087225	0.0123	0.0179	0.0234	0.0237	0.025

## Sheet: Fig 2f
Time (s)	0	10	20	30	40	50	60	70	80	90	100	110	120	130	140	150	160	170	180
Normalized intensity	1	1.00893	1.00702	1.00014	0.980008	0.975631	0.977292	0.966877	0.955756	0.941947	0.93915	0.919939	0.934526	0.928264	0.918306	0.944481	0.937607	0.925248	0.910883
	1	1.00119	0.993351	0.990068	0.958471	0.97401	0.969851	1.01088	0.974649	0.951892	1.00377	1.03437	1.00563	1.02308	1.03014	1.02563	1.02473	1.01821	1.03743
	1	0.97091	0.978559	0.936552	0.983682	0.967983	0.975693	1.00709	0.998946	1.00366	1.00277	1.00363	0.996907	1.0105	1.00699	0.986407	0.974161	0.956179	0.972792
	1	0.9826	0.993141	0.948498	0.91901	0.913497	0.928692	0.920777	0.8816	0.90631	0.91094	0.900913	0.90438	0.904449	0.897024	0.876629	0.881837	0.879284	0.885978
	1	1.03307	0.992121	0.947856	1.03704	0.99747	1.05912	1.07535	1.04687	1.04536	1.0229	1.04234	0.985422	0.996691	0.954346	0.962172	0.950838	0.912225	0.943736
mean	1	0.9993	0.9928	0.9646	0.9756	0.9657	0.9821	0.9962	0.9716	0.9698	0.9759	0.9802	0.9654	0.9726	0.9614	0.9591	0.9538	0.9382	0.9502
SEM	0	0.0108	0.0045053	0.0127	0.0192	0.014	0.0212	0.0256	0.0272	0.0245	0.0215	0.0294	0.0196	0.0236	0.0254	0.0247	0.0233	0.0235	0.0263

## Sheet: Fig 2h
Time (s)	0	9.40453	23.7569	37.0037	50.3006	63.4851	76.7674	90.0729	103.339	116.633	129.927	143.222	156.432	169.697	182.897	196.078
Normalized intensity	1	1.03189	1.03377	1.18185	1.40271	1.63283	1.82047	2.0275	2.20583	2.34817	2.35558	2.57771	2.75151	2.8251	2.73467	2.58609
	1	1.13543	1.16479	1.17002	1.36457	1.47657	1.57041	1.75349	1.88789	1.99418	2.10308	2.08891	2.19838	2.17812	2.06237	2.08512
	1	0.994637	0.957624	0.968402	0.954997	0.983146	1.04504	1.09591	1.17302	1.18049	1.15947	1.19345	1.23755	1.34201	1.34894
	1	1.04563	0.936133	0.934935	0.990276	1.06361	1.19613	1.29904	1.36353	1.34004	1.28738	1.31772	1.38489	1.41803	1.39757	1.43626
mean	1	1.0519	1.0231	1.0638	1.1781	1.289	1.408	1.544	1.6576	1.7157	1.7264	1.7944	1.8931	1.9408	1.8859	2.0358
SEM	0	0.0299	0.0517	0.0651	0.1191	0.1575	0.1763	0.2118	0.2372	0.2746	0.2961	0.3277	0.3557	0.35	0.3264	0.3328

## Sheet: Fig 2j
Time (s)	0	20	40	60	80	100	120	140	160	180	200
Normalized intensity	1	1.05468	1.02255	0.995366	0.891796	0.831488	0.792893	0.759186	0.717503	0.709941	0.704459
	1	1.00856	1.04388	0.947103	0.909208	0.833479	0.770176	0.796347	0.731934	0.726797	0.690662
	1	0.999743	1.09462	0.96797	0.894265	0.842127	0.836454	0.876059	0.803327	0.778378	0.729319
	1	0.918871	0.970012	0.874921	0.800746	0.68171	0.679073	0.682681	0.667218	0.663007	0.712588
	1	0.959718	0.900211	0.786476	0.633792	0.611747	0.527324	0.538984	0.458289	0.429433	0.442717
mean	1	0.9883	1.0063	0.9144	0.826	0.7601	0.7212	0.7307	0.6757	0.6615	0.6559
SEM	0	0.023	0.0332	0.0377	0.0517	0.0476	0.0549	0.0571	0.0585	0.0609	0.0537

## Sheet: Fig 2l
Time (s)	0	13.3997	36.8688	59.6547	82.4467	105.217	128.004	150.886	173.758	196.529
Normalized intensity	1	0.977204	1.01073	0.976398	0.949681	0.970183	0.926863	0.972983	0.960672	0.923137
	1	1.00951	1.00763	0.983168	1.07025	1.07854	1.09116	0.963182	0.965863	0.909003
	1	0.982697	1.03154	1.04506	1.08055	1.11244	1.15283	1.15288	1.12197	1.08816
	1	0.961693	0.978793	0.891367	0.83452	0.881783	0.898053	0.966862	0.914175	0.896592
mean	1	0.9828	1.0072	0.974	0.9838	1.0107	1.0172	1.014	0.9907	0.9542
SEM	0	0.01	0.0108	0.0316	0.0579	0.0526	0.0621	0.0463	0.0453	0.045

## Sheet: Fig 3a
	Lyso-NpHR3.0	Lyso-NpHR3.0+light	Lyso-ArchT	Lyso-ArchT+light	Vector	Vector+light
	30858	26188.2	16844.3	31940.3	18818.4	19625.2
	22278.1	25554.1	20490.1	29903	21519	17846.7
	25017.4	23181.4	19494.4	29075.6	21443.1	19455.1
	30481.7	28015.8	19625.9	34088.1	19719.1	20571.6
	28294.7	26587.5	20552.5	29438.6	20241.7	19613.8
	30110.6	23582.3	21532.2	31214.5	23434	18399.7
	20391.6	24755.1	20449.9	31522.3	19059.3	17610.2
	25135.9	24993.5	20048.4	31754.7	16404.3	16058.8
	31146	26580.9	18014.8	33185.8	21341.9	16312.4
	32890.3	20798.1	20169.1	33646.3	19834.1	17711.5
	32241.6	20551.9	19719.8	30419.7	19792.3	21221.7
	28793.1	22347.8	20122.3	34256.5	18829.6	16995.3
	26063.6	25246.8	16928.6	31689.6	20175	20782.8
	25284.4	22637.6	17231.9	33034.2	19859.7	21835.3
	25556	20449.9	18587	30915.2	16677.6	22611.1
	22903.5	22357.1	19093.2	31934.7	17276.7	20339
	23589.2	21273.8	19524.1	30931.9	22042	19811.1
	23641.8	22390.9	24003.3	28407.2	20788.3	19223.9
	25342.6	20532.7	21363.8	32571.4	20211.4	18476.6
	29093.4	22945.8	20951.1	29214	17459.5	19685.8
	24419	27446.8	20142.7	31821.2	16777.4	19348.1
	25792.8	22484.2	19040.2	27064.4	16586.7	19932.5
		25811.2	18614	29672.7	16377.7	20041.4
		23707.7	18210	30077.4	20083.1	20902.6
		23910.9	17166.3	25885.1	22519	20249.8
		25143.4	19056.4	28135.6	19058.4	20932.1
		20225.7	19092.9	27654.9	18785.2	21269.4
		20115.1	17713.4	27614	19811.3	21314.2
						20820.7
Mean	26787.5	23564.9	19420.8	30609.6	19461.6	19620.6
SEM	741.706	443.534	300.114	415.929	364.346	303.303
P value	0.000294595		1.89633e-28		0.737878

## Sheet: Fig 3b
	Lyso-ChR2	Lyso-ChR2+light	ChR2	ChR2+light
	3083.36	4986.21	2813.95	2707.31
	2768.86	4502.97	2553.49	2884.54
	2672.89	5019.38	2613.9	3923.77
	2806.1	5248.93	2784.97	3319.92
	2706.55	5312.79	2661.71	3012.82
	2663.86	5175.4	2739.8	2631.2
	2683.81	4737.81	2596.4	2799.78
	3000.4	5610.29	3589.71	3055.18
	2538.41	5640.49	2696.89	2796.75
	2877.76	4501.78	2791.16	2840.1
	2743.91	5316.63	2832.29	2742.01
	2946.03	6046.8	2564.73	2675.28
	2786.02	6412.61	2371.26	2785.13
	2719.93	5319.78	2656.63	2932.5
	2593.54	4970.32	2839.85	2767.36
	2606.18	4908.88	3246.76	2542.6
	2670.3	4288.08	2465.46	2816.95
	2698.69	4362.02	3168.84	3017.88
	2703.77	4278.16	3120.34	2521.79
	3101.12	4578.02	2172.33	2691.46
	4893.18	4680.67	3260.93	2724.77
	2710.99	4816.46	2643.85	2795.75
	2362.84	5611.31	2817.19	2894.35
	2636.47	4074.86	3300.17	2824.41
	2784.19	4649.07	3357.34	2830.07
	2261.57	4793.61	3784.39	2407.98
	2338.16	4374.33	3196.44	2536.56
	3195.31	3888.55	3117.05	2711.17
	2391.3	5517.14	3344.62	2864.61
	2722.32	4224.47	2490.04	2586.59
	3048.79	4057.8	2688.49	3071.16
	2961.02	4315.04	2630.89	3032.67
	2890.86	4407.07	2632.14	2656.1
	2465.88	4362.4	2265.63	2436.79
	2467.98	5710.43	2619.18	2343.26
	2811.85	4310.41	2389.16	2605.59
	2681.33	4359.41	2160.6	3198.87
	2810.36	4447.68	2500.93	2474.36
	2701.96	4139.69	2683.47	2555.07
	3135.14	3872	2865.97	2319.82
	3160.3	4439.62	2395.39	2424.35
	3249.66	7940.24	3465.41	2787.85
	3090.08	4327.39	2852.76	2673.32
	2835.38	4507.91	2186.49	3118.09
	2764.44	4727.61		2559.07
	2652.13	5009.01		2394.78
	3278.45	5672.26		2199.83
	2924.07	6902.18		2243.52
	2707.37	4115.64		2300.04
	2742.2	4249.1		2820.52
Mean	2820.94	4874.41	2793.84	2737.11
SEM	53.6815	111.865	58.4988	42.9181
P value	3.88738e-30		0.429163

## Sheet: Fig 3c
	Lyso-NpHR 3.0	Lyso-NpHR3.0+light	Lyso-ArchT	Lyso-ArchT +light	Vector	Vector+light
	20127.7	28945.2	31019.8	19990.6	25960.6	28207.8
	19924.5	33629	27727.1	21113.7	25225.4	28015.5
	20932.2	32188	28990.4	21055.9	27252.5	29579.8
	21092.6	30635.5	30344.6	20506.6	24473.4	27406.2
	21967	30883.8	29611.7	19960.2	23932.8	28205.8
	21516.8	32687.2	26413.5	19846.7	32965.3	32587.4
	19454.8	28767.5	24299.7	17495.9	32070.7	29009
	21247.2	33906.8	27074	17364.1	32514.9	27301.4
	20221.9	34110.5	23775.1	20028.2	31655.6	25800.6
	20147.8	29294.8	25756.7	19846.1	30078	28290.9
	18969.6	28156.8	26477.2	19481.1	31184.1	26032.6
	19762.2	28748.3	25317.3	19863.3	26562.3	27129.6
	23682.2	32813.1	26370.2	22975.4	26106.7	28737.1
	24386.6	30517.7	27901.1	19349	27464	33154.8
	22748.3	29921	26065	17381.2	29890.3	30996.6
	24490.2	29984.2	23985.9	18222.1	26458.9	30495
	24142.2	26110.9	23787.9	16934.6	27945.6	31087.1
	21420.7	27001.8	25262.4	17730.3	27930.5	31485.7
	21960.3	25141.4	24260.2	18723.5	30929	29104.6
	21496.5	26288.9	27096.1	16817.5	29704.3	31263.5
	22143	25824.9	23182.7	18658.8	29132	30603
	19003.2	27225.9	29505.6	17586.4	27594.4	32422.4
	20115.2	27930.2	24774.6	20074.5	25216.6	29728.3
	18964.2	24859.8	26087.5	22451	25960.6	24239.9
	19252.6	24238	28008.8	17176.3	25225.4	27049.5
	17632.1	30608	23582.3	15399.1	27252.5	32489.6
	18460.2	25961.3	24840.1	17048.4	24473.4	26593.7
	18514.7	23933	24339.3	16627	23932.8	26445.3
				15712.5
				14281.1
				14260.7
Mean	20849.2	28939.8	26280.6	18514.9	27824.7	29052.2
SEM	353.171	571.99	414.606	388.4	519.378	443.676
P value	6.51896e-17		1.1828e-19		0.0779263

[truncated: 41 more sheets: Fig 3d, Fig 3e, Fig 3f, Fig 4b, Fig 4d, Fig 4f, Fig 4g, Fig 4h, Fig 5b, Fig 5d, Fig 5e, Fig 5g, Fig 5i, Fig 5k, Fig 5m, Fig 6e, Fig 6g, Fig 6j, Fig 6k, Fig S3a …]
